# Supplementary material for: Inhibition of mitochondrial complex II in neuronal cells triggers unique pathways culminating in autophagy with implications for neurodegeneration
Source: PubMed Central journal article supplement (PMC7810707; doi:10.1038/s41598-020-79339-2), 2021-01-15

## SUPPLEMENTARY INFORMATION

### **Inhibition of mitochondrial complex II in neuronal cells triggers unique pathways culminating in autophagy with implications for neurodegeneration**

**Sathyanarayanan Ranganayaki<sup>\*</sup>, Neema Jamshidi<sup>+</sup>, Mohamad Aiyaz<sup>&</sup>, Santhosh-Kumar Rashmi<sup>%</sup>, Narayanappa Gayathri<sup>%</sup>, Pulleri Kandi Harsha<sup>\$</sup>, Balasundaram Padmanabhan<sup>^</sup> and Muchukunte Mukunda Srinivas Bharath<sup>#@</sup>**

From the <sup>\*</sup>Department of Neurochemistry, National Institute of Mental Health and Neurosciences (NIMHANS), No. 2900, Hosur Road, Bangalore-560029, Karnataka, INDIA; <sup>+</sup>Department of Radiological Sciences, Ronald Reagan UCLA Medical Center, Los Angeles, California 90095, USA; <sup>&</sup>Genotypic Technology Pvt. Ltd., 2/13, Balaji Complex, 80 feet Road, RMV 2<sup>nd</sup> Stage, Bangalore-560094, Karnataka, INDIA; <sup>%</sup>Department of Neuropathology, NIMHANS, No. 2900, Hosur Road, Bangalore-560029, Karnataka, INDIA; <sup>\$</sup>Department of Neurovirology, NIMHANS, No. 2900, Hosur Road, Bangalore-560029, Karnataka, INDIA; <sup>^</sup>Department of Biophysics, NIMHANS, No. 2900, Hosur Road, Bangalore-560029, Karnataka, INDIA; <sup>#</sup>Department of Clinical Psychopharmacology and Neurotoxicology, NIMHANS, No. 2900, Hosur Road, Bangalore-560029, Karnataka, INDIA.

**Running title:** *Complex II inhibition elicits unique cascade in neurons*

**Supplementary table 1.** List of antibodies used for immunoblotting and immunocytochemistry in the current study.

| <b>Sl. No.</b> | <b>Protein detected/<br/>Primary antibody</b> | <b>RRID</b> | <b>Dilution</b> | <b>Secondary antibody</b> |
|----------------|-----------------------------------------------|-------------|-----------------|---------------------------|
| 1.             | LC3B (CST)                                    | AB_915950   | 1:1000          | Goat Anti- mouse          |
| 2.             | SQSTM1 (Abcam)                                | AB_945626   | 1:1000          | Goat Anti- mouse          |
| 3.             | LAMP1 (Abcam)                                 | AB_775978   | 1:1000          | Goat Anti- rabbit         |
| 4.             | mTOR (Abcam)                                  | AB_303257   | 1:500           | Goat Anti- rabbit         |
| 5.             | RPTOR (Abcam)                                 | AB_304901   | 1:500           | Goat Anti- rabbit         |
| 6.             | S6K1 (CST)                                    | AB_331676   | 1:1000          | Goat Anti- rabbit         |
| 7.             | pS6K1(T389) (CST)                             | AB_330944   | 1:500           | Goat Anti- rabbit         |
| 8.             | EIF4eBP (CST)                                 | AB_331692   | 1:1000          | Goat Anti- rabbit         |
| 9.             | pEIF4eBP (T46) (CST)                          | AB_560835   | 1:500           | Goat Anti- rabbit         |
| 10.            | PRAS40 (CST) (CST)                            | AB_916206   | 1:1000          | Goat Anti- rabbit         |
| 11.            | pPRAS40 (T246) (CST)                          | AB_916141   | 1:500           | Goat Anti- rabbit         |
| 12.            | AMPK (CST)                                    | AB_330331   | 1:1000          | Goat Anti- rabbit         |
| 13.            | pAMPK (T172) (CST)                            | AB_331250   | 1:500           | Goat Anti- rabbit         |
| 14.            | RICTOR (CST)                                  | AB_2179961  | 1:500           | Goat Anti- rabbit         |
| 15.            | mSIN1 (CST)                                   | AB_2798048  | 1:1000          | Goat Anti- rabbit         |
| 16.            | pmSIN1 (T86) (CST)                            | AB_2798584  | 1:500           | Goat Anti- rabbit         |
| 17.            | AKT (CST)                                     | AB_915783   | 1:1000          | Goat Anti- rabbit         |
| 18.            | pAKT (S473) (CST)                             | AB_329825   | 1:500           | Goat Anti- rabbit         |
| 19.            | pAKT (T308) (Abcam)                           | AB_722678   | 1:500           | Goat Anti- rabbit         |
| 20.            | BECN1 (Abcam)                                 | AB_955699   | 1:1000          | Goat Anti- rabbit         |
| 21.            | BCL2 (Abcam)                                  | AB_2064155  | 1:2000          | Goat Anti- rabbit         |
| 22.            | CASP3 (Abcam)                                 | AB_443014   | 1:1000          | Goat Anti- rabbit         |
| 23.            | CASP9 (Abcam)                                 | AB_448813   | 1:1000          | Goat Anti- mouse          |
| 24.            | BDNF (Abcam)                                  | AB_10862052 | 1:1000          | Goat Anti- rabbit         |
| 25.            | Beta-actin (Sigma)                            | AB_476744   | 1:3000          | Goat Anti- mouse          |

**Supplementary table 2: List of up-regulated genes upon 3-NPA treatment.** The Gene symbol, Gene name and fold change in expression (3-NPA/Control) are indicated.

| Gene Symbol | Gene Name                                                                                                                    | Fold change |
|-------------|------------------------------------------------------------------------------------------------------------------------------|-------------|
| Abca4       | ATP-binding cassette, subfamily A (ABC1), member 4                                                                           | 3.51        |
| Abca8       | ATP-binding cassette, subfamily A (ABC1), member 8                                                                           | 2.98        |
| Abcb1b      | ATP-binding cassette, subfamily B (MDR/TAP), member 1B                                                                       | 4.51        |
| Abcc12      | ATP-binding cassette, subfamily C (CFTR/MRP), member 12                                                                      | 1.82        |
| Abcc2       | ATP-binding cassette, subfamily C (CFTR/MRP), member 2                                                                       | 5.51        |
| Abcc5       | ATP-binding cassette, subfamily C (CFTR/MRP), member 5                                                                       | 1.89        |
| Abcg311     | ATP-binding cassette, subfamily G (WHITE), member 3-like 1                                                                   | 2.04        |
| Abhd12b     | abhydrolase domain containing 12B                                                                                            | 3.13        |
| Ablim3      | actin binding LIM protein family, member 3                                                                                   | 3.84        |
| Abo         | ABO blood group (transferase A, alpha 1-3-N-acetylgalactosaminyltransferase; transferase B, alpha 1-3-galactosyltransferase) | 1.88        |
| Acacb       | acetyl-CoA carboxylase beta                                                                                                  | 2.48        |
| Acad11      | acyl-CoA dehydrogenase family, member 11                                                                                     | 1.75        |
| Acap1       | ArfGAP with coiled-coil, ankyrin repeat and PH domains 1                                                                     | 4.15        |
| Acap2       | ArfGAP with coiled-coil, ankyrin repeat and PH domains 2                                                                     | 2.55        |
| Ace         | angiotensin I converting enzyme (peptidyl-dipeptidase A) 1                                                                   | 5.26        |
| Acer2       | alkaline ceramidase 2                                                                                                        | 3.60        |
| Acot13      | acyl-CoA thioesterase 13                                                                                                     | 1.80        |
| Acot2       | acyl-CoA thioesterase 2                                                                                                      | 1.86        |
| Acot4       | acyl-CoA thioesterase 4                                                                                                      | 1.88        |
| Acox1       | acyl-CoA oxidase-like                                                                                                        | 2.06        |
| Acp5        | acid phosphatase 5, tartrate resistant                                                                                       | 2.70        |
| Acpt        | acid phosphatase, testicular                                                                                                 | 1.97        |
| Acr         | acrosin                                                                                                                      | 2.05        |
| Acss1       | acyl-CoA synthetase short-chain family member 1                                                                              | 2.22        |
| Actg2       | actin, gamma 2, smooth muscle, enteric                                                                                       | 2.35        |
| Actn3       | actinin alpha 3                                                                                                              | 2.29        |
| Actr3b      | ARP3 actin-related protein 3 homolog B (yeast)                                                                               | 5.77        |
| Actrt3      | actin-related protein T3                                                                                                     | 2.15        |
| Adam19      | ADAM metallopeptidase domain 19                                                                                              | 2.80        |
| Adam8       | ADAM metallopeptidase domain 8                                                                                               | 3.10        |
| Adamts15    | ADAM metallopeptidase with thrombospondin type 1 motif, 15                                                                   | 1.82        |
| Adamts2     | ADAM metallopeptidase with thrombospondin type 1 motif, 2                                                                    | 3.28        |
| Adamts7     | ADAM metallopeptidase with thrombospondin type 1 motif, 7                                                                    | 2.46        |
| Adap2       | ArfGAP with dual PH domains 2                                                                                                | 2.47        |
| Adcy8       | adenylate cyclase 8 (brain)                                                                                                  | 2.44        |
| Add2        | adducin 2 (beta)                                                                                                             | 5.53        |
| Adh1c       | alcohol dehydrogenase 1C (class I), gamma polypeptide                                                                        | 2.53        |
| Adh7        | alcohol dehydrogenase 7 (class IV), mu or sigma polypeptide                                                                  | 9.87        |

|           |                                                           |       |
|-----------|-----------------------------------------------------------|-------|
| Adipoq    | adiponectin, C1Q and collagen domain containing           | 3.14  |
| Adora2a   | adenosine A2a receptor                                    | 3.53  |
| Adprhl1   | ADP-ribosylhydrolase like 1                               | 1.88  |
| Aen       | apoptosis enhancing nuclease                              | 3.21  |
| Afap111   | actin filament associated protein 1-like 1                | 2.17  |
| Afmid     | arylformamidase                                           | 4.45  |
| Afp       | alpha-fetoprotein                                         | 11.96 |
| Agap1     | ArfGAP with GTPase domain, ankyrin repeat and PH domain 1 | 1.95  |
| Agl       | amylo-alpha-1, 6-glucosidase, 4-alpha-glucanotransferase  | 1.76  |
| Ahnak2    | AHNAK nucleoprotein 2                                     | 13.71 |
| Ahr       | aryl hydrocarbon receptor                                 | 2.06  |
| Ahrr      | aryl-hydrocarbon receptor repressor                       | 2.32  |
| Aifm3     | apoptosis-inducing factor, mitochondrion-associated 3     | 2.21  |
| Aipl1     | aryl hydrocarbon receptor-interacting protein-like 1      | 1.89  |
| Ak8       | adenylate kinase 8                                        | 2.72  |
| Akap12    | A kinase (PRKA) anchor protein 12                         | 3.29  |
| Akap17b   | A kinase (PRKA) anchor protein 17B                        | 2.11  |
| Akap7     | A kinase (PRKA) anchor protein 7                          | 1.81  |
| Akr1b8    | aldo-keto reductase family 1, member B8                   | 2.60  |
| Akr1c12   | aldo-keto reductase family 1, member C12                  | 5.01  |
| Akr1c12l1 | aldo-keto reductase family 1, member C12-like 1           | 1.80  |
| Akr1c19   | aldo-keto reductase family 1, member C19                  | 3.36  |
| Akr1c3    | aldo-keto reductase family 1, member C3                   | 2.18  |
| Akr1e2    | aldo-keto reductase family 1, member E2                   | 2.29  |
| Alcam     | activated leukocyte cell adhesion molecule                | 6.46  |
| Aldh18a1  | aldehyde dehydrogenase 18 family, member A1               | 2.13  |
| Aldh3a1   | aldehyde dehydrogenase 3 family, member A1                | 2.69  |
| Aldh3a2   | aldehyde dehydrogenase 3 family, member A2                | 2.06  |
| Aloxe3    | arachidonate lipoxygenase 3                               | 3.52  |
| Alpk1     | alpha-kinase 1                                            | 2.08  |
| Ambp      | alpha-1-microglobulin/bikunin precursor                   | 2.76  |
| Amigo2    | adhesion molecule with Ig like domain 2                   | 2.15  |
| Ampd3     | adenosine monophosphate deaminase 3                       | 2.73  |
| Amph      | amphiphysin                                               | 2.59  |
| Amt       | aminomethyltransferase                                    | 2.23  |
| Amz1      | archaelysin family metallopeptidase 1                     | 1.77  |
| Ang       | angiogenin, ribonuclease, RNase A family, 5               | 5.81  |
| Ang1      | angiogenin, ribonuclease A family, member 1               | 5.69  |
| Angel2    | angel homolog 2 (Drosophila)                              | 1.95  |
| Angpt1    | angiopoietin 1                                            | 2.34  |
| Ank2      | ankyrin 2, neuronal                                       | 2.03  |
| Ank3      | ankyrin 3, node of Ranvier                                | 1.76  |
| Ankrd27   | ankyrin repeat domain 27 (VPS9 domain)                    | 2.49  |
| Ankrd28   | ankyrin repeat domain 28                                  | 2.58  |
| Ankrd33b  | ankyrin repeat domain 33B                                 | 1.86  |

|           |                                                                         |      |
|-----------|-------------------------------------------------------------------------|------|
| Ano3      | anoctamin 3                                                             | 2.69 |
| Anxa9     | annexin A9                                                              | 2.74 |
| Aoc3      | amine oxidase, copper containing 3 (vascular adhesion protein 1)        | 1.93 |
| Aox1      | aldehyde oxidase 1                                                      | 2.90 |
| Ap1ar     | adaptor-related protein complex 1 associated regulatory protein         | 1.80 |
| Ap3b2     | adaptor-related protein complex 3, beta 2 subunit                       | 7.36 |
| Ap5s1     | adaptor-related protein complex 5, sigma 1 subunit                      | 2.85 |
| Apba2     | amyloid beta (A4) precursor protein-binding, family A, member 2         | 2.07 |
| Apbb3     | amyloid beta (A4) precursor protein-binding, family B, member 3         | 1.91 |
| Apc       | adenomatous polyposis coli                                              | 2.18 |
| Apc2      | adenomatosis polyposis coli 2                                           | 1.79 |
| Apln      | apelin                                                                  | 4.69 |
| Apoa5     | apolipoprotein A-V                                                      | 1.84 |
| Apobec1   | apolipoprotein B mRNA editing enzyme, catalytic polypeptide 1           | 2.95 |
| Apobec2   | apolipoprotein B mRNA editing enzyme, catalytic polypeptide-like 2      | 2.07 |
| Apoc2     | apolipoprotein C-II                                                     | 3.61 |
| Apoe      | apolipoprotein E                                                        | 2.04 |
| Apol9a    | apolipoprotein L 9a                                                     | 2.13 |
| Apold1    | apolipoprotein L domain containing 1                                    | 3.22 |
| Aqp11     | aquaporin 11                                                            | 1.93 |
| Arap3-ps1 | ArfGAP with RhoGAP domain, ankyrin repeat and PH domain 3, pseudogene 1 | 2.68 |
| Arc       | activity-regulated cytoskeleton-associated protein                      | 3.81 |
| Areg      | amphiregulin                                                            | 5.81 |
| Arg1      | arginase, liver                                                         | 3.52 |
| Arg2      | arginase type II                                                        | 3.37 |
| Arhgap20  | Rho GTPase activating protein 20                                        | 4.08 |
| Arhgap22  | Rho GTPase activating protein 22                                        | 3.80 |
| Arhgap32  | Rho GTPase activating protein 32                                        | 2.49 |
| Arhgap39  | Rho GTPase activating protein 39                                        | 1.88 |
| Arhgef11  | Rho guanine nucleotide exchange factor (GEF) 11                         | 1.99 |
| Arhgef6   | Rac/Cdc42 guanine nucleotide exchange factor (GEF) 6                    | 2.97 |
| Arhgef9   | Cdc42 guanine nucleotide exchange factor (GEF) 9                        | 2.02 |
| Arl4c-ps1 | ADP-ribosylation factor-like 4C, pseudogene 1                           | 3.71 |
| Arl5c     | ADP-ribosylation factor-like 5C                                         | 2.67 |
| Armc12    | armadillo repeat containing 12                                          | 2.17 |
| Armcx2    | armadillo repeat containing, X-linked 2                                 | 2.38 |
| Arnt2     | aryl hydrocarbon receptor nuclear translocator 2                        | 1.95 |
| Arntl2    | aryl hydrocarbon receptor nuclear translocator-like 2                   | 2.03 |
| Art3      | ADP-ribosyltransferase 3                                                | 3.73 |
| Asah1     | N-acylsphingosine amidohydrolase (acid ceramidase) 1                    | 2.24 |
| Asgr1     | asialoglycoprotein receptor 1                                           | 6.35 |
| Asic1     | acid-sensing (proton-gated) ion channel 1                               | 5.06 |
| Asip      | agouti signaling protein                                                | 2.00 |
| Asns      | asparagine synthetase (glutamine-hydrolyzing)                           | 2.35 |
| Aspa      | aspartoacylase                                                          | 1.91 |

|          |                                                                          |      |
|----------|--------------------------------------------------------------------------|------|
| Astl     | astacin-like metalloendopeptidase (M12 family)                           | 6.14 |
| Atcay    | ataxia, cerebellar, Cayman type                                          | 1.79 |
| Atf5     | activating transcription factor 5                                        | 1.98 |
| Atg16l1  | autophagy related 16-like 1 ( <i>S. cerevisiae</i> )                     | 3.03 |
| Atmin    | ATM interactor                                                           | 2.38 |
| Atp10d   | ATPase, class V, type 10D                                                | 2.15 |
| Atp1b2   | ATPase, Na <sup>+</sup> /K <sup>+</sup> transporting, beta 2 polypeptide | 3.09 |
| Atp6ap1l | ATPase, H <sup>+</sup> transporting, lysosomal accessory protein 1-like  | 4.21 |
| Atp6v1a  | ATPase, H <sup>+</sup> transporting, lysosomal V1 subunit A              | 2.25 |
| Atp6v1c1 | ATPase, H <sup>+</sup> transporting, lysosomal V1 subunit C1             | 1.89 |
| Atp7b    | ATPase, Cu <sup>++</sup> transporting, beta polypeptide                  | 1.85 |
| Atp8b3   | ATPase, aminophospholipid transporter, class I, type 8B, member 3        | 1.76 |
| Atxn1    | ataxin 1                                                                 | 1.98 |
| Axin2    | axin 2                                                                   | 3.04 |
| B3gnt1   | UDP-GlcNAc:betaGal beta-1,3-N-acetylglucosaminyltransferase 1            | 1.83 |
| B4galnt1 | beta-1,4-N-acetyl-galactosaminyl transferase 1                           | 1.94 |
| B4galt4  | UDP-Gal:betaGlcNAc beta 1,4-galactosyltransferase, polypeptide 4         | 2.52 |
| Bach1    | BTB and CNC homology 1, basic leucine zipper transcription factor 1      | 2.56 |
| Bai2     | brain-specific angiogenesis inhibitor 2                                  | 3.12 |
| Batf     | basic leucine zipper transcription factor, ATF-like                      | 2.12 |
| Bbc3     | Bcl-2 binding component 3                                                | 1.82 |
| Bbs4     | Bardet-Biedl syndrome 4                                                  | 1.83 |
| Bbx      | bobby sox homolog ( <i>Drosophila</i> )                                  | 1.97 |
| Bcam     | basal cell adhesion molecule (Lutheran blood group)                      | 1.91 |
| Bcan     | brevican                                                                 | 7.82 |
| Bcas1    | breast carcinoma amplified sequence 1                                    | 4.83 |
| Bcl11a   | B-cell CLL/lymphoma 11A (zinc finger protein)                            | 1.94 |
| Bcl2     | B-cell CLL/lymphoma 2                                                    | 2.05 |
| Bcl2l10  | BCL2-like 10 (apoptosis facilitator)                                     | 1.95 |
| Bcl6b    | B-cell CLL/lymphoma 6, member B                                          | 1.96 |
| Bdh2     | 3-hydroxybutyrate dehydrogenase, type 2                                  | 2.72 |
| Bdkrb2   | bradykinin receptor B2                                                   | 2.54 |
| Bdnf     | brain-derived neurotrophic factor                                        | 1.80 |
| Bex2     | brain expressed X-linked 2                                               | 3.11 |
| Bex4     | brain expressed, X-linked 4                                              | 2.74 |
| Bgn      | biglycan                                                                 | 1.93 |
| Bhlha15  | basic helix-loop-helix family, member a15                                | 2.41 |
| Bhmt2    | betaine-homocysteine S-methyltransferase 2                               | 2.31 |
| Bik      | BCL2-interacting killer (apoptosis-inducing)                             | 2.23 |
| Bin2     | bridging integrator 2                                                    | 2.63 |
| Birc7    | baculoviral IAP repeat-containing 7                                      | 5.04 |
| Blnk     | B-cell linker                                                            | 8.16 |
| Bloc1s3  | biogenesis of lysosomal organelles complex-1, subunit 3                  | 1.82 |
| Bmp7     | bone morphogenetic protein 7                                             | 1.83 |
| Bmyc     | brain expressed myelocytomatosis oncogene                                | 3.68 |

|          |                                                                                     |       |
|----------|-------------------------------------------------------------------------------------|-------|
| Bnc2     | basonuclin 2                                                                        | 1.78  |
| Bpifb6   | BPI fold containing family B, member 6                                              | 21.63 |
| Brsk2    | BR serine/threonine kinase 2                                                        | 1.94  |
| Bsn      | bassoon (presynaptic cytomatrix protein)                                            | 4.42  |
| Btbd10   | BTB (POZ) domain containing 10                                                      | 1.75  |
| Btbd17   | BTB (POZ) domain containing 17                                                      | 1.84  |
| Btg3     | BTG family, member 3                                                                | 1.88  |
| Bucs1    | butyryl Coenzyme A synthetase 1                                                     | 1.98  |
| C1galt1  | core 1 synthase, glycoprotein-N-acetylgalactosamine 3-beta-galactosyltransferase, 1 | 1.79  |
| C1qtnf1  | C1q and tumor necrosis factor related protein 1                                     | 6.70  |
| C1qtnf4  | C1q and tumor necrosis factor related protein 4                                     | 4.38  |
| C1qtnf6  | C1q and tumor necrosis factor related protein 6                                     | 2.86  |
| C4bpb    | complement component 4 binding protein, beta                                        | 3.16  |
| Ca2      | carbonic anhydrase 2                                                                | 2.09  |
| Cables2  | Cdk5 and Abl enzyme substrate 2                                                     | 2.49  |
| Cabp1    | calcium binding protein 1                                                           | 2.19  |
| Cacfd1   | calcium channel flower domain containing 1                                          | 2.80  |
| Cacna1h  | calcium channel, voltage-dependent, T type, alpha 1H subunit                        | 2.16  |
| Cacna2d1 | calcium channel, voltage-dependent, alpha2/delta subunit 1                          | 5.59  |
| Cacnb4   | calcium channel, voltage-dependent, beta 4 subunit                                  | 2.37  |
| Calb2    | calbindin 2                                                                         | 5.82  |
| Caly     | calcyon neuron-specific vesicular protein                                           | 3.48  |
| Camkk1   | calcium/calmodulin-dependent protein kinase kinase 1, alpha                         | 3.00  |
| Camp     | cathelicidin antimicrobial peptide                                                  | 1.89  |
| Camsap3  | calmodulin regulated spectrin-associated protein family, member 3                   | 2.66  |
| Camta2   | calmodulin binding transcription activator 2                                        | 2.87  |
| Capn8    | calpain 8                                                                           | 11.25 |
| Capns2   | calpain, small subunit 2                                                            | 2.59  |
| Car15    | carbonic anhydrase 15                                                               | 2.00  |
| Car6     | carbonic anhydrase 6                                                                | 1.82  |
| Car6     | carbonic anhydrase 6                                                                | 1.85  |
| Caskin1  | CASK interacting protein 1                                                          | 2.01  |
| Casp4    | caspase 4, apoptosis-related cysteine peptidase                                     | 2.23  |
| Catsper4 | cation channel, sperm associated 4                                                  | 2.27  |
| Cblc     | Cbl proto-oncogene, E3 ubiquitin protein ligase C                                   | 2.19  |
| Cbp      | Csk binding protein                                                                 | 1.94  |
| Cbr3     | carbonyl reductase 3                                                                | 2.02  |
| Cby3     | chibby homolog 3 (Drosophila)                                                       | 1.84  |
| Ccdc116  | coiled-coil domain containing 116                                                   | 2.50  |
| Ccdc126  | coiled-coil domain containing 126                                                   | 1.88  |
| Ccdc15   | coiled-coil domain containing 15                                                    | 3.79  |
| Ccdc162  | coiled-coil domain containing 162                                                   | 2.07  |
| Ccdc175  | coiled-coil domain containing 175                                                   | 2.03  |
| Ccdc63   | coiled-coil domain containing 63                                                    | 2.24  |

|          |                                                                           |      |
|----------|---------------------------------------------------------------------------|------|
| Ccdc79   | coiled-coil domain containing 79                                          | 2.05 |
| Ccdc88b  | coiled-coil domain containing 88B                                         | 2.25 |
| Ccdc92   | coiled-coil domain containing 92                                          | 1.88 |
| Cck      | cholecystokinin                                                           | 9.50 |
| Ccl17    | chemokine (C-C motif) ligand 17                                           | 1.92 |
| Ccl19    | chemokine (C-C motif) ligand 19                                           | 3.63 |
| Ccl5     | chemokine (C-C motif) ligand 5                                            | 4.27 |
| Ccnb1ip1 | cyclin B1 interacting protein 1, E3 ubiquitin protein ligase              | 4.59 |
| Ccnb3    | cyclin B3                                                                 | 2.42 |
| Ccnd2    | cyclin D2                                                                 | 3.87 |
| Ccr111   | chemokine (C-C motif) receptor 1-like 1                                   | 1.79 |
| Ccr12    | chemokine (C-C motif) receptor-like 2                                     | 1.88 |
| Ccrn4l   | CCR4 carbon catabolite repression 4-like ( <i>S. cerevisiae</i> )         | 2.43 |
| Cd101    | CD101 molecule                                                            | 1.74 |
| Cd177    | CD177 molecule                                                            | 2.10 |
| Cd247    | Cd247 molecule                                                            | 3.91 |
| Cd248    | CD248 molecule, endosialin                                                | 1.81 |
| Cd300a   | Cd300a molecule                                                           | 2.23 |
| Cd40     | CD40 molecule, TNF receptor superfamily member 5                          | 3.77 |
| Cd55     | Cd55 molecule                                                             | 2.11 |
| Cd68     | Cd68 molecule                                                             | 2.41 |
| Cd74     | Cd74 molecule, major histocompatibility complex, class II invariant chain | 9.49 |
| Cd83     | CD83 molecule                                                             | 1.77 |
| Cdc14a   | CDC14 cell division cycle 14 homolog A ( <i>S. cerevisiae</i> )           | 2.13 |
| Cdc14b   | CDC14 cell division cycle 14 homolog B ( <i>S. cerevisiae</i> )           | 3.03 |
| Cdc42bpa | CDC42 binding protein kinase alpha                                        | 1.78 |
| Cdc42bpg | CDC42 binding protein kinase gamma (DMPK-like)                            | 2.20 |
| Cdca7l   | cell division cycle associated 7 like                                     | 5.14 |
| Cdh17    | cadherin 17                                                               | 3.66 |
| Cdh23    | cadherin-related 23                                                       | 2.41 |
| Cdhr5    | cadherin-related family member 5                                          | 1.95 |
| Cdk12    | cyclin-dependent kinase 12                                                | 2.01 |
| Cdk19    | cyclin-dependent kinase 19                                                | 2.02 |
| Cdkn1a   | cyclin-dependent kinase inhibitor 1A                                      | 7.46 |
| Cdnf     | cerebral dopamine neurotrophic factor                                     | 1.97 |
| Cds1     | CDP-diacylglycerol synthase 1                                             | 3.12 |
| Cdyl2    | chromodomain protein, Y-like 2                                            | 2.36 |
| Cebpa    | CCAAT/enhancer binding protein (C/EBP), alpha                             | 2.64 |
| Celf4    | CUGBP, Elav-like family member 4                                          | 5.21 |
| Celf5    | CUGBP, Elav-like family member 5                                          | 2.02 |
| Cep97    | centrosomal protein 97                                                    | 1.76 |
| Cers1    | ceramide synthase 1                                                       | 2.28 |
| Cers1    | ceramide synthase 1                                                       | 2.64 |
| Cers6    | ceramide synthase 6                                                       | 2.37 |
| Cers6    | ceramide synthase 6                                                       | 2.44 |



|         |                                                             |       |
|---------|-------------------------------------------------------------|-------|
| Ces1a   | carboxylesterase 1A                                         | 3.74  |
| Cfd     | complement factor D (adipsin)                               | 3.52  |
| Cgref1  | cell growth regulator with EF hand domain 1                 | 3.00  |
| Ch25h   | cholesterol 25-hydroxylase                                  | 2.42  |
| Chac1   | ChaC, cation transport regulator homolog 1 (E. coli)        | 2.05  |
| Chd2    | chromodomain helicase DNA binding protein 2                 | 2.23  |
| Chgb    | chromogranin B (secretogranin 1)                            | 2.14  |
| Chit1   | chitinase 1 (chitotriosidase)                               | 3.87  |
| Chml    | choroideremia-like (Rab escort protein 2)                   | 2.80  |
| Chmp2b  | charged multivesicular body protein 2B                      | 1.89  |
| Chrd    | chordin                                                     | 2.07  |
| Chrna5  | cholinergic receptor, nicotinic, alpha 5 (neuronal)         | 1.97  |
| Chrnd   | cholinergic receptor, nicotinic, delta (muscle)             | 2.44  |
| Chst1   | carbohydrate (keratan sulfate Gal-6) sulfotransferase 1     | 2.94  |
| Chst10  | carbohydrate sulfotransferase 10                            | 12.78 |
| Chst13  | carbohydrate (chondroitin 4) sulfotransferase 13            | 3.47  |
| Chst5   | carbohydrate (N-acetylglucosamine 6-O) sulfotransferase 5   | 2.83  |
| Chst8   | carbohydrate (N-acetylgalactosamine 4-O) sulfotransferase 8 | 3.16  |
| Chsy1   | chondroitin sulfate synthase 1                              | 1.78  |
| Chuk    | conserved helix-loop-helix ubiquitous kinase                | 1.82  |
| Cidea   | cell death-inducing DFFA-like effector a                    | 2.28  |
| Ciita   | class II, major histocompatibility complex, transactivator  | 4.85  |
| Ckm     | creatine kinase, muscle                                     | 2.51  |
| Ckmt2   | creatine kinase, mitochondrial 2, sarcomeric                | 2.32  |
| Clcn7   | chloride channel, voltage-sensitive 7                       | 1.89  |
| Clcnkb  | chloride channel, voltage-sensitive Kb                      | 1.80  |
| Cldn4   | claudin 4                                                   | 11.68 |
| Clec12a | C-type lectin domain family 12, member A                    | 3.09  |
| Clec4a1 | C-type lectin domain family 4, member A1                    | 2.01  |
| Clgn    | calmegin                                                    | 2.23  |
| Clic5   | chloride intracellular channel 5                            | 5.93  |
| Cln3    | ceroid-lipofuscinosis, neuronal 3                           | 1.81  |
| Cln5    | ceroid-lipofuscinosis, neuronal 5                           | 2.46  |
| Clock   | clock circadian regulator                                   | 2.16  |
| Clpsl2  | colipase-like 2                                             | 1.83  |
| Clu     | clusterin                                                   | 2.64  |
| Cmb1    | carboxymethylenebutenolidase homolog (Pseudomonas)          | 2.49  |
| Cmpk2   | cytidine monophosphate (UMP-CMP) kinase 2, mitochondrial    | 5.60  |
| Cmtm2a  | CKLF-like MARVEL transmembrane domain containing 2A         | 3.13  |
| Cmtm4   | CKLF-like MARVEL transmembrane domain containing 4          | 1.97  |
| Cndp1   | carnosine dipeptidase 1 (metallopeptidase M20 family)       | 3.25  |
| Cnksr1  | connector enhancer of kinase suppressor of Ras 1            | 2.23  |
| Cnnm2   | cyclin M2                                                   | 1.91  |
| Cnst    | consortin, connexin sorting protein                         | 1.95  |
| Cntn2   | contactin 2 (axonal)                                        | 2.00  |

|         |                                                            |       |
|---------|------------------------------------------------------------|-------|
| Col11a2 | collagen, type XI, alpha 2                                 | 3.41  |
| Col12a1 | collagen, type XII, alpha 1                                | 5.27  |
| Col14a1 | collagen, type XIV, alpha 1                                | 1.88  |
| Col15a1 | collagen, type XV, alpha 1                                 | 3.63  |
| Col17a1 | collagen, type XVII, alpha 1                               | 3.13  |
| Col1a1  | collagen, type I, alpha 1                                  | 2.06  |
| Col20a1 | collagen, type XX, alpha 1                                 | 11.56 |
| Col27a1 | collagen, type XXVII, alpha 1                              | 7.39  |
| Col5a2  | collagen, type V, alpha 2                                  | 1.92  |
| Col5a3  | collagen, type V, alpha 3                                  | 2.12  |
| Col6a1  | collagen, type VI, alpha 1                                 | 8.01  |
| Col6a2  | collagen, type VI, alpha 2                                 | 2.35  |
| Col7a1  | collagen, type VII, alpha 1                                | 2.43  |
| Col8a1  | collagen, type VIII, alpha 1                               | 2.35  |
| Copg2   | coatamer protein complex, subunit gamma 2                  | 1.88  |
| Coro6   | coronin 6                                                  | 2.98  |
| Cort    | cortistatin                                                | 3.04  |
| Cox6a2  | cytochrome c oxidase subunit VIa polypeptide 2             | 11.15 |
| Cpa1    | carboxypeptidase A1 (pancreatic)                           | 1.87  |
| Cpamd8  | C3 and PZP-like, alpha-2-macroglobulin domain containing 8 | 5.29  |
| Cpe     | carboxypeptidase E                                         | 2.68  |
| Cpeb1   | cytoplasmic polyadenylation element binding protein 1      | 2.97  |
| Cpeb4   | cytoplasmic polyadenylation element binding protein 4      | 2.00  |
| Cplx2   | complexin 2                                                | 2.04  |
| Cpm     | carboxypeptidase M                                         | 3.35  |
| Cpne6   | copine VI (neuronal)                                       | 2.06  |
| Cpne7   | copine VII                                                 | 4.91  |
| Cpne9   | copine family member IX                                    | 2.20  |
| Cpt1b   | carnitine palmitoyltransferase 1b, muscle                  | 2.06  |
| Cpz     | carboxypeptidase Z                                         | 3.09  |
| Crabp1  | cellular retinoic acid binding protein 1                   | 1.91  |
| Crb3    | crumbs homolog 3 (Drosophila)                              | 2.24  |
| Crcp    | CGRP receptor component                                    | 2.30  |
| Creb3l3 | cAMP responsive element binding protein 3-like 3           | 7.03  |
| Creb5   | cAMP responsive element binding protein 5                  | 1.93  |
| Crebl2  | cAMP responsive element binding protein-like 2             | 2.63  |
| Creg1   | cellular repressor of E1A-stimulated genes 1               | 3.25  |
| Crip1   | cysteine-rich protein 1 (intestinal)                       | 2.10  |
| Crif1   | cytokine receptor-like factor 1                            | 1.95  |
| Crtc3   | CREB regulated transcription coactivator 3                 | 1.91  |
| Cryba4  | crystallin, beta A4                                        | 3.43  |
| Crybb2  | crystallin, beta B2                                        | 10.79 |
| Crybg3  | beta-gamma crystallin domain containing 3                  | 4.14  |
| Cryl1   | crystallin, lambda 1                                       | 2.00  |
| Crym    | crystallin, mu                                             | 2.88  |

|         |                                                                                        |      |
|---------|----------------------------------------------------------------------------------------|------|
| Cryz    | crystallin, zeta (quinone reductase)                                                   | 1.82 |
| Csdc2   | cold shock domain containing C2, RNA binding                                           | 2.78 |
| Cspg4   | chondroitin sulfate proteoglycan 4                                                     | 3.07 |
| Csrnp1  | cysteine-serine-rich nuclear protein 1                                                 | 1.93 |
| Csrnp2  | cysteine-serine-rich nuclear protein 2                                                 | 1.78 |
| Csrp2   | cysteine and glycine-rich protein 2                                                    | 1.80 |
| Csrp3   | cysteine and glycine-rich protein 3 (cardiac LIM protein)                              | 3.74 |
| Cst6    | cystatin E/M                                                                           | 2.50 |
| Cst9l   | cystatin 9-like                                                                        | 3.92 |
| Ctdp1   | CTD (carboxy-terminal domain, RNA polymerase II, polypeptide A) phosphatase, subunit 1 | 1.78 |
| Ctgf    | connective tissue growth factor                                                        | 2.04 |
| Ctla2a  | cytotoxic T lymphocyte-associated protein 2 alpha                                      | 2.90 |
| Ctnna2  | catenin (cadherin associated protein), alpha 2                                         | 3.12 |
| Ctrb1   | chymotrypsinogen B1                                                                    | 2.47 |
| Ctss    | cathepsin S                                                                            | 2.43 |
| Ctsw    | cathepsin W                                                                            | 5.41 |
| Ctxn3   | cortexin 3                                                                             | 2.78 |
| Cul9    | cullin 9                                                                               | 2.05 |
| Cxcl10  | chemokine (C-X-C motif) ligand 10                                                      | 2.74 |
| Cxcl14  | chemokine (C-X-C motif) ligand 14                                                      | 6.38 |
| Cxcr3   | chemokine (C-X-C motif) receptor 3                                                     | 2.32 |
| Cyfp2   | cytoplasmic FMR1 interacting protein 2                                                 | 2.19 |
| Cyfp2   | cytoplasmic FMR1 interacting protein 2                                                 | 2.48 |
| Cyp11a1 | cytochrome P450, family 11, subfamily a, polypeptide 1                                 | 3.61 |
| Cyp27a1 | cytochrome P450, family 27, subfamily a, polypeptide 1                                 | 2.23 |
| Cyp27b1 | cytochrome P450, family 27, subfamily b, polypeptide 1                                 | 2.15 |
| Cyp2b3  | cytochrome P450, family 2, subfamily b, polypeptide 3                                  | 2.92 |
| Cyp2b3  | cytochrome P450, family 2, subfamily b, polypeptide 3                                  | 1.96 |
| Cyp2c7  | cytochrome P450, family 2, subfamily c, polypeptide 7                                  | 2.23 |
| Cyp2d1  | cytochrome P450, family 2, subfamily d, polypeptide 1                                  | 3.22 |
| Cyp2d5  | cytochrome P450, family 2, subfamily d, polypeptide 5                                  | 2.59 |
| Cyp2f4  | cytochrome P450, family 2, subfamily f, polypeptide 4                                  | 3.25 |
| Cyp2j4  | cytochrome P450, family 2, subfamily j, polypeptide 4                                  | 4.45 |
| Cyp2j4  | cytochrome P450, family 2, subfamily j, polypeptide 4                                  | 2.73 |
| Cyp2s1  | cytochrome P450, family 2, subfamily s, polypeptide 1                                  | 2.61 |
| Cyp3a9  | cytochrome P450, family 3, subfamily a, polypeptide 9                                  | 2.92 |
| Cyp4f1  | cytochrome P450, family 4, subfamily f, polypeptide 1                                  | 7.59 |
| Cyp4f5  | cytochrome P450, family 4, subfamily f, polypeptide 5                                  | 4.13 |
| Dapk1   | death associated protein kinase 1                                                      | 2.69 |
| Dcaf5   | DDB1 and CUL4 associated factor 5                                                      | 1.94 |
| Dclk2   | doublecortin-like kinase 2                                                             | 1.97 |
| Dclk3   | doublecortin-like kinase 3                                                             | 2.65 |
| Dcp1b   | DCP1 decapping enzyme homolog b ( <i>S. cerevisiae</i> )                               | 3.65 |
| Ddc     | dopa decarboxylase (aromatic L-amino acid decarboxylase)                               | 3.73 |

|         |                                                |       |
|---------|------------------------------------------------|-------|
| Ddit3   | DNA-damage inducible transcript 3              | 3.35  |
| Ddx60   | DEAD (Asp-Glu-Ala-Asp) box polypeptide 60      | 4.57  |
| Defb29  | defensin beta 29                               | 3.64  |
| Defb36  | defensin beta 36                               | 2.19  |
| Defb42  | defensin beta 42                               | 1.97  |
| Dennd2d | DENN/MADD domain containing 2D                 | 3.91  |
| Deptor  | DEP domain containing MTOR-interacting protein | 2.41  |
| Dfnb31  | deafness, autosomal recessive 31               | 1.88  |
| Dgkd    | diacylglycerol kinase, delta                   | 1.81  |
| Dhh     | desert hedgehog                                | 2.42  |
| Dhh     | desert hedgehog                                | 3.47  |
| Dhrs2   | dehydrogenase/reductase (SDR family) member 2  | 3.69  |
| Dlg2    | discs, large homolog 2 (Drosophila)            | 2.28  |
| Dlg4    | discs, large homolog 4 (Drosophila)            | 1.83  |
| Dll1    | delta-like 1 (Drosophila)                      | 3.94  |
| Dll3    | delta-like 3 (Drosophila)                      | 2.67  |
| Dll3    | delta-like 3 (Drosophila)                      | 2.26  |
| Dlx3    | distal-less homeobox 3                         | 3.28  |
| Dmbx1   | diencephalon/mesencephalon homeobox 1          | 8.10  |
| Dmd     | dystrophin                                     | 2.18  |
| Dmkn    | dermokine                                      | 4.07  |
| Dna2    | DNA replication helicase 2 homolog (yeast)     | 2.01  |
| Dnah12  | dynein, axonemal, heavy chain 12               | 11.35 |
| Dnajb9  | DnaJ (Hsp40) homolog, subfamily B, member 9    | 1.94  |
| Dnajc12 | DnaJ (Hsp40) homolog, subfamily C, member 12   | 5.54  |
| Dnajc6  | DnaJ (Hsp40) homolog, subfamily C, member 6    | 3.75  |
| Dnm3    | dynamamin 3                                    | 2.34  |
| Dnm3    | dynamamin 3                                    | 2.20  |
| Dnmbp   | dynamamin binding protein                      | 2.24  |
| Doc2a   | double C2-like domains, alpha                  | 6.31  |
| Dock9   | dedicator of cytokinesis 9                     | 1.82  |
| Dos     | downstream of Stk11                            | 1.86  |
| Dpep2   | dipeptidase 2                                  | 3.72  |
| Dpysl3  | dihydropyrimidinase-like 3                     | 2.32  |
| Dqx1    | DEAQ box RNA-dependent ATPase 1                | 2.27  |
| Dsp     | desmoplakin                                    | 1.91  |
| Dtx3    | deltex homolog 3 (Drosophila)                  | 1.80  |
| Duox1   | dual oxidase 1                                 | 3.66  |
| Duox2   | dual oxidase 2                                 | 4.86  |
| Dusp10  | dual specificity phosphatase 10                | 2.21  |
| Dusp13  | dual specificity phosphatase 13                | 6.01  |
| Dusp2   | dual specificity phosphatase 2                 | 2.36  |
| Dusp26  | dual specificity phosphatase 26 (putative)     | 1.97  |
| Dusp4   | dual specificity phosphatase 4                 | 2.17  |
| Dusp5   | dual specificity phosphatase 5                 | 2.65  |

|          |                                                                  |      |
|----------|------------------------------------------------------------------|------|
| Dusp6    | dual specificity phosphatase 6                                   | 1.96 |
| Dusp9    | dual specificity phosphatase 9                                   | 2.14 |
| Dydc1    | DPY30 domain containing 1                                        | 1.82 |
| Dynll2   | dynein light chain LC8-type 2                                    | 1.87 |
| Dyrk2    | dual-specificity tyrosine-(Y)-phosphorylation regulated kinase 2 | 1.89 |
| Dyrk3    | dual-specificity tyrosine-(Y)-phosphorylation regulated kinase 3 | 2.29 |
| Dyx1c1   | dyslexia susceptibility 1 candidate 1 homolog (human)            | 1.78 |
| Eaf2     | ELL associated factor 2                                          | 7.06 |
| Ear11    | eosinophil-associated, ribonuclease A family, member 11          | 3.49 |
| Ece1     | endothelin converting enzyme 1                                   | 1.78 |
| Ecm1     | extracellular matrix protein 1                                   | 3.09 |
| Eddm3b   | epididymal protein 3B                                            | 3.10 |
| Eef2k    | eukaryotic elongation factor-2 kinase                            | 2.19 |
| Eef2k    | eukaryotic elongation factor-2 kinase                            | 2.32 |
| Efcab6   | EF-hand calcium binding domain 6                                 | 3.34 |
| Efcab9   | EF-hand calcium binding domain 9                                 | 2.01 |
| Efha2    | EF hand domain family, member A2                                 | 1.82 |
| Efhd1    | EF-hand domain family, member D1                                 | 3.84 |
| Efnb1    | ephrin B1                                                        | 1.93 |
| Efr3b    | EFR3 homolog B ( <i>S. cerevisiae</i> )                          | 1.91 |
| Egr3     | early growth response 3                                          | 1.97 |
| Ei24     | etoposide induced 2.4                                            | 1.95 |
| Eid2     | EP300 interacting inhibitor of differentiation 2                 | 1.86 |
| Eif4a2   | eukaryotic translation initiation factor 4A2                     | 1.96 |
| Eif4e3   | eukaryotic translation initiation factor 4E family member 3      | 1.93 |
| Eif4e3   | eukaryotic translation initiation factor 4E family member 3      | 1.79 |
| Eif4ebp1 | eukaryotic translation initiation factor 4E binding protein 1    | 1.81 |
| Elmsan1  | ELM2 and Myb/SANT-like domain containing 1                       | 2.83 |
| Eln      | elastin                                                          | 3.26 |
| Elovl2   | ELOVL fatty acid elongase 2                                      | 3.02 |
| Emid1    | EMI domain containing 1                                          | 2.92 |
| Emilin3  | elastin microfibril interfacier 3                                | 1.86 |
| Eml5     | echinoderm microtubule associated protein like 5                 | 2.80 |
| Eml5     | echinoderm microtubule associated protein like 5                 | 3.18 |
| Eno3     | enolase 3, beta, muscle                                          | 1.81 |
| Enpp1    | ectonucleotide pyrophosphatase/phosphodiesterase 1               | 4.46 |
| Enpp2    | ectonucleotide pyrophosphatase/phosphodiesterase 2               | 5.37 |
| Enpp3    | ectonucleotide pyrophosphatase/phosphodiesterase 3               | 2.69 |
| Enthd1   | ENTH domain containing 1                                         | 6.06 |
| Entpd1   | ectonucleoside triphosphate diphosphohydrolase 1                 | 3.93 |
| Entpd2   | ectonucleoside triphosphate diphosphohydrolase 2                 | 2.25 |
| Entpd2   | ectonucleoside triphosphate diphosphohydrolase 2                 | 2.06 |
| Entpd2   | ectonucleoside triphosphate diphosphohydrolase 2                 | 2.00 |
| Entpd3   | ectonucleoside triphosphate diphosphohydrolase 3                 | 2.41 |
| Entpd6   | ectonucleoside triphosphate diphosphohydrolase 6                 | 2.03 |

|         |                                                             |      |
|---------|-------------------------------------------------------------|------|
| Epb4111 | erythrocyte membrane protein band 4.1-like 1                | 1.79 |
| Epb49   | erythrocyte membrane protein band 4.9 (dematin)             | 2.00 |
| Epdrl   | ependymin related protein 1 (zebrafish)                     | 3.14 |
| Epha2   | Eph receptor A2                                             | 2.42 |
| Epha8   | Eph receptor A8                                             | 6.02 |
| Ephb2   | Eph receptor B2                                             | 2.05 |
| Ephb6   | Eph receptor B6                                             | 2.47 |
| Eps8l1  | EPS8-like 1                                                 | 4.22 |
| Ero11b  | ERO1-like beta ( <i>S. cerevisiae</i> )                     | 1.75 |
| Espn    | espin                                                       | 5.45 |
| Espn    | espin                                                       | 4.04 |
| Etl4    | enhancer trap locus 4                                       | 2.07 |
| Ets1    | v-ets erythroblastosis virus E26 oncogene homolog 1 (avian) | 2.00 |
| Ets2    | v-ets erythroblastosis virus E26 oncogene homolog 2 (avian) | 1.82 |
| Ets2    | v-ets erythroblastosis virus E26 oncogene homolog 2 (avian) | 2.28 |
| Etv2    | ets variant 2                                               | 4.27 |
| Etv3    | ets variant 3                                               | 3.32 |
| Etv4    | ets variant 4                                               | 2.54 |
| Etv5    | ets variant 5                                               | 4.34 |
| Etv5    | ets variant 5                                               | 3.83 |
| Eva1c   | eva-1 homolog C                                             | 3.14 |
| Evpl    | envoplakin                                                  | 2.14 |
| Exd1    | exonuclease 3'-5' domain containing 1                       | 3.30 |
| Exoc3l4 | exocyst complex component 3-like 4                          | 1.81 |
| Exoc6b  | exocyst complex component 6B                                | 2.45 |
| Extl1   | exostoses (multiple)-like 1                                 | 2.20 |
| Ezh1    | enhancer of zeste homolog 1 ( <i>Drosophila</i> )           | 1.78 |
| F10     | coagulation factor X                                        | 3.30 |
| F12     | coagulation factor XII (Hageman factor)                     | 4.18 |
| F2rl1   | coagulation factor II (thrombin) receptor-like 1            | 2.02 |
| F3      | coagulation factor III (thromboplastin, tissue factor)      | 2.43 |
| Faah    | fatty acid amide hydrolase                                  | 1.98 |
| Faim2   | Fas apoptotic inhibitory molecule 2                         | 1.83 |
| Fam101a | family with sequence similarity 101, member A               | 5.48 |
| Fam102b | family with sequence similarity 102, member B               | 3.86 |
| Fam105a | family with sequence similarity 105, member A               | 3.15 |
| Fam110b | family with sequence similarity 110, member B               | 1.93 |
| Fam118a | family with sequence similarity 118, member A               | 1.88 |
| Fam124a | family with sequence similarity 124A                        | 3.19 |
| Fam126b | family with sequence similarity 126, member B               | 2.76 |
| Fam131b | family with sequence similarity 131, member B               | 1.87 |
| Fam134b | family with sequence similarity 134, member B               | 1.85 |
| Fam134b | family with sequence similarity 134, member B               | 2.39 |
| Fam135a | family with sequence similarity 135, member A               | 1.86 |
| Fam13c  | family with sequence similarity 13, member C                | 2.34 |

|             |                                                                      |      |
|-------------|----------------------------------------------------------------------|------|
| Fam151a     | family with sequence similarity 151, member A                        | 4.42 |
| Fam160b2    | family with sequence similarity 160, member B2                       | 2.26 |
| Fam161b     | family with sequence similarity 161, member B                        | 1.78 |
| Fam167a     | family with sequence similarity 167, member A                        | 3.36 |
| Fam171b     | family with sequence similarity 171, member B                        | 6.12 |
| Fam186b     | family with sequence similarity 186, member B                        | 2.09 |
| Fam186b     | family with sequence similarity 186, member B                        | 1.84 |
| Fam210b     | family with sequence similarity 210, member B                        | 2.04 |
| Fam214a     | family with sequence similarity 214, member A                        | 2.14 |
| Fam219a     | family with sequence similarity 219, member A                        | 3.19 |
| Fam219a     | family with sequence similarity 219, member A                        | 2.98 |
| Fam220a     | family with sequence similarity 220, member A                        | 3.20 |
| Fam221a     | family with sequence similarity 221, member A                        | 2.75 |
| Fam227a     | family with sequence similarity 227, member A                        | 6.41 |
| Fam227b     | family with sequence similarity 227, member B                        | 2.16 |
| Fam26e      | family with sequence similarity 26, member E                         | 3.81 |
| Fam26f      | family with sequence similarity 26, member F                         | 4.74 |
| Fam46b      | family with sequence similarity 46, member B                         | 1.99 |
| Fam46c      | family with sequence similarity 46, member C                         | 2.28 |
| Fam49a      | family with sequence similarity 49, member A                         | 1.80 |
| Fam57b      | family with sequence similarity 57, member B                         | 5.02 |
| Fam60a      | family with sequence similarity 60, member A                         | 2.12 |
| Fam65b      | family with sequence similarity 65, member B                         | 2.22 |
| Fam69b      | family with sequence similarity 69, member B                         | 2.09 |
| Fam71e1     | family with sequence similarity 71, member E1                        | 1.78 |
| Fam83h      | family with sequence similarity 83, member H                         | 2.32 |
| Fam90a1-ps2 | family with sequence similarity 90, member A1-pseudogene 2           | 2.02 |
| Fam90a1-ps2 | family with sequence similarity 90, member A1-pseudogene 2           | 1.74 |
| Fastkd1     | FAST kinase domains 1                                                | 2.23 |
| Fbln1       | fibulin 1                                                            | 1.93 |
| Fbln2       | fibulin 2                                                            | 2.31 |
| Fbn1        | fibrillin 1                                                          | 1.85 |
| Fbp2        | fructose-1,6-bisphosphatase 2                                        | 9.47 |
| Fbxl20      | F-box and leucine-rich repeat protein 20                             | 1.94 |
| Fbxl4       | F-box and leucine-rich repeat protein 4                              | 3.21 |
| Fbxo23      | F-box only protein 23                                                | 2.09 |
| Fbxo32      | F-box protein 32                                                     | 2.27 |
| Fbxo43      | F-box protein 43                                                     | 8.06 |
| Fcer1g      | Fc fragment of IgE, high affinity I, receptor for; gamma polypeptide | 2.02 |
| Fcgr2b      | Fc fragment of IgG, low affinity IIb, receptor (CD32)                | 2.62 |
| Fcgr3a      | Fc fragment of IgG, low affinity IIIa, receptor                      | 7.12 |
| Fcho1       | FCH domain only 1                                                    | 2.22 |
| Fcrl6       | Fc receptor-like 6                                                   | 1.92 |

|        |                                                       |       |
|--------|-------------------------------------------------------|-------|
| Fech   | ferrochelatase                                        | 2.15  |
| Fem1b  | fem-1 homolog b (C. elegans)                          | 2.23  |
| Fer1l4 | fer-1-like 4 (C. elegans)                             | 3.72  |
| Fermt1 | fermitin family member 1                              | 2.38  |
| Fetub  | fetuin B                                              | 2.58  |
| Fez1   | fasciculation and elongation protein zeta 1 (zygin I) | 4.86  |
| Fgf21  | fibroblast growth factor 21                           | 2.60  |
| Fgfr4  | fibroblast growth factor receptor 4                   | 2.04  |
| Fgg    | fibrinogen gamma chain                                | 6.08  |
| Fibcd1 | fibrinogen C domain containing 1                      | 10.07 |
| Flcn   | folliculin                                            | 2.53  |
| Flrt1  | fibronectin leucine rich transmembrane protein 1      | 4.20  |
| Flrt2  | fibronectin leucine rich transmembrane protein 2      | 2.84  |
| Flt3   | fms-related tyrosine kinase 3                         | 2.57  |
| Fmnl1  | formin-like 1                                         | 1.92  |
| Fmo2   | flavin containing monooxygenase 2                     | 3.89  |
| Fmo2   | flavin containing monooxygenase 2                     | 3.00  |
| Fmo9p  | flavin containing monooxygenase 9 pseudogene          | 2.27  |
| Fmod   | fibromodulin                                          | 2.98  |
| Fn3k   | fructosamine 3 kinase                                 | 4.71  |
| Fnbp1  | formin binding protein 1                              | 2.24  |
| Fnbp11 | formin binding protein 1-like                         | 2.02  |
| Fntb   | farnesyltransferase, CAAX box, beta                   | 2.04  |
| Fosl1  | fos-like antigen 1                                    | 6.77  |
| Foxa1  | forkhead box A1                                       | 2.00  |
| Foxe1  | forkhead box E1 (thyroid transcription factor 2)      | 2.76  |
| Foxj2  | forkhead box J2                                       | 1.79  |
| Foxk1  | forkhead box K1                                       | 2.07  |
| Foxo6  | forkhead box O6                                       | 2.27  |
| Fras1  | Fraser syndrome 1                                     | 2.08  |
| Frem3  | FRAS1 related extracellular matrix 3                  | 5.04  |
| Frmd5  | FERM domain containing 5                              | 3.22  |
| Frmpd1 | FERM and PDZ domain containing 1                      | 3.66  |
| Fry    | furry homolog (Drosophila)                            | 3.91  |
| Fst    | follistatin                                           | 2.45  |
| Fstl3  | follistatin-like 3 (secreted glycoprotein)            | 2.23  |
| Fstl3  | follistatin-like 3 (secreted glycoprotein)            | 2.27  |
| Ftcd   | formiminotransferase cyclodeaminase                   | 3.65  |
| Fut1   | fucosyltransferase 1                                  | 5.97  |
| Fut7   | fucosyltransferase 7 (alpha (1,3) fucosyltransferase) | 1.82  |
| Fxyd5  | FXYD domain-containing ion transport regulator 5      | 2.04  |
| Fxyd6  | FXYD domain-containing ion transport regulator 6      | 16.54 |
| Fxyd7  | FXYD domain-containing ion transport regulator 7      | 2.57  |
| Fzd4   | frizzled family receptor 4                            | 2.23  |
| Fzd9   | frizzled family receptor 9                            | 2.84  |



|           |                                                                                          |      |
|-----------|------------------------------------------------------------------------------------------|------|
| G0s2      | G0/G1 switch 2                                                                           | 3.22 |
| Gaa       | glucosidase, alpha, acid                                                                 | 2.14 |
| Gabarap11 | GABA(A) receptor-associated protein like 1                                               | 2.52 |
| Gabbr1    | gamma-aminobutyric acid (GABA) B receptor 1                                              | 2.15 |
| Gabbr1    | gamma-aminobutyric acid (GABA) B receptor 1                                              | 2.29 |
| Gabbr2    | gamma-aminobutyric acid (GABA) B receptor 2                                              | 2.80 |
| Gal3st4   | galactose-3-O-sulfotransferase 4                                                         | 2.28 |
| Galm      | galactose mutarotase (aldose 1-epimerase)                                                | 3.14 |
| Galnt11   | UDP-N-acetyl-alpha-D-galactosamine:polypeptide N-acetylgalactosaminyltransferase-like 1  | 3.00 |
| Galp      | galanin-like peptide                                                                     | 1.96 |
| Gas2l3    | growth arrest-specific 2 like 3                                                          | 1.85 |
| Gas5      | growth arrest specific 5                                                                 | 2.12 |
| Gas6      | growth arrest specific 6                                                                 | 1.89 |
| Gata3     | GATA binding protein 3                                                                   | 2.20 |
| Gata4     | GATA binding protein 4                                                                   | 1.98 |
| Gbp5      | guanylate binding protein 5                                                              | 3.64 |
| Gbp5      | guanylate binding protein 5                                                              | 2.82 |
| Gchfr     | GTP cyclohydrolase I feedback regulator                                                  | 1.99 |
| Gcnt2     | glucosaminyl (N-acetyl) transferase 2, I-branching enzyme                                | 2.32 |
| Gdf15     | growth differentiation factor 15                                                         | 2.18 |
| Ggh       | gamma-glutamyl hydrolase (conjugase, folylpolyglutamyl hydrolase)                        | 2.31 |
| Ggt5      | gamma-glutamyltransferase 5                                                              | 3.12 |
| Ghrh      | growth hormone releasing hormone                                                         | 2.13 |
| Gigyf1    | GRB10 interacting GYF protein 1                                                          | 1.97 |
| Gimap5    | GTPase, IMAP family member 5                                                             | 3.07 |
| Gja4      | gap junction protein, alpha 4                                                            | 3.30 |
| Gja8      | gap junction membrane channel protein alpha 8                                            | 2.46 |
| Gjb5      | gap junction protein, beta 5                                                             | 5.59 |
| Gkap1     | G kinase anchoring protein 1                                                             | 2.11 |
| Gli1      | GLI family zinc finger 1                                                                 | 3.46 |
| Glpr1     | GLI pathogenesis-related 1                                                               | 5.46 |
| Glp1r     | glucagon-like peptide 1 receptor                                                         | 1.96 |
| Glt8d2    | glycosyltransferase 8 domain containing 2                                                | 2.53 |
| Gna13     | guanine nucleotide binding protein (G protein), alpha 13                                 | 1.96 |
| Gnao1     | guanine nucleotide binding protein (G protein), alpha activating activity polypeptide O  | 2.17 |
| Gnao1     | guanine nucleotide binding protein (G protein), alpha activating activity polypeptide O  | 2.10 |
| Gnaq      | guanine nucleotide binding protein (G protein), q polypeptide                            | 2.20 |
| Gnat1     | guanine nucleotide binding protein (G protein), alpha transducing activity polypeptide 1 | 3.96 |
| Gnat2     | guanine nucleotide binding protein (G protein), alpha transducing activity polypeptide 2 | 1.80 |
| Gnaz      | guanine nucleotide binding protein (G protein), alpha z polypeptide                      | 2.52 |
| Gng3      | guanine nucleotide binding protein (G protein), gamma 3                                  | 1.90 |
| Gng8      | guanine nucleotide binding protein (G protein), gamma 8                                  | 2.76 |

|         |                                                                                          |       |
|---------|------------------------------------------------------------------------------------------|-------|
| Gngt2   | guanine nucleotide binding protein (G protein), gamma transducing activity polypeptide 2 | 1.87  |
| Gnpda1  | glucosamine-6-phosphate deaminase 1                                                      | 1.95  |
| Golm1   | golgi membrane protein 1                                                                 | 1.97  |
| Gpc3    | glypican 3                                                                               | 1.98  |
| Gpha2   | glycoprotein hormone alpha 2                                                             | 2.65  |
| Gpld1   | glycosylphosphatidylinositol specific phospholipase D1                                   | 3.05  |
| Gpm6a   | glycoprotein m6a                                                                         | 3.72  |
| Gpnmb   | glycoprotein (transmembrane) nmb                                                         | 14.07 |
| Gpr146  | G protein-coupled receptor 146                                                           | 1.75  |
| Gpr4    | G protein-coupled receptor 4                                                             | 2.38  |
| Gpr75   | G protein-coupled receptor 75                                                            | 1.76  |
| Gpr77   | G protein-coupled receptor 77                                                            | 1.86  |
| Gpr83   | G protein-coupled receptor 83                                                            | 3.25  |
| Gpr85   | G protein-coupled receptor 85                                                            | 3.97  |
| Gprc5b  | G protein-coupled receptor, family C, group 5, member B                                  | 5.03  |
| Gprc5d  | G protein-coupled receptor, family C, group 5, member D                                  | 1.77  |
| Gprin3  | GPRIN family member 3                                                                    | 2.19  |
| Gpx2    | glutathione peroxidase 2                                                                 | 1.87  |
| Gramd1a | GRAM domain containing 1A                                                                | 1.82  |
| Grb7    | growth factor receptor bound protein 7                                                   | 2.22  |
| Grid2   | glutamate receptor, ionotropic, delta 2                                                  | 1.78  |
| Grid2ip | glutamate receptor, ionotropic, delta 2 (Grid2) interacting protein                      | 2.67  |
| Grifin  | galectin-related inter-fiber protein                                                     | 2.21  |
| Grm4    | glutamate receptor, metabotropic 4                                                       | 6.16  |
| Grm4    | glutamate receptor, metabotropic 4                                                       | 3.85  |
| Grp     | gastrin releasing peptide                                                                | 4.61  |
| Gsta2   | glutathione S-transferase alpha 2                                                        | 3.84  |
| Gsta3   | glutathione S-transferase A3                                                             | 15.70 |
| Gsta4   | glutathione S-transferase alpha 4                                                        | 3.29  |
| Gsta5   | glutathione S-transferase Yc2 subunit                                                    | 5.13  |
| Gsta5   | glutathione S-transferase alpha 5                                                        | 6.00  |
| Gstm1   | glutathione S-transferase mu 1                                                           | 1.84  |
| Gstm7   | glutathione S-transferase, mu 7                                                          | 2.17  |
| Gstp1   | glutathione S-transferase pi 1                                                           | 2.03  |
| Gulp1   | GULP, engulfment adaptor PTB domain containing 1                                         | 2.15  |
| Gyg1    | glycogenin 1                                                                             | 2.21  |
| Gzmc    | granzyme C                                                                               | 2.73  |
| Gzmc    | granzyme C                                                                               | 1.84  |
| H19     | H19, imprinted maternally expressed transcript (non-protein coding)                      | 4.42  |
| Hadh    | hydroxyacyl-CoA dehydrogenase                                                            | 1.90  |
| Hal     | histidine ammonia lyase                                                                  | 2.79  |
| Hap1    | huntingtin-associated protein 1                                                          | 2.04  |
| Hapln2  | hyaluronan and proteoglycan link protein 2                                               | 3.61  |
| Hapln3  | hyaluronan and proteoglycan link protein 3                                               | 5.94  |

|           |                                                                                                |       |
|-----------|------------------------------------------------------------------------------------------------|-------|
| Hbegf     | heparin-binding EGF-like growth factor                                                         | 1.92  |
| Hbz       | hemoglobin, zeta                                                                               | 1.98  |
| Hck       | hemopoietic cell kinase                                                                        | 5.44  |
| Hcst      | hematopoietic cell signal transducer                                                           | 2.34  |
| Hdgfrp3   | hepatoma-derived growth factor, related protein 3                                              | 1.78  |
| Helb      | helicase (DNA) B                                                                               | 2.11  |
| Herc6     | HECT and RLD domain containing E3 ubiquitin protein ligase family member 6                     | 3.70  |
| Herpud1   | homocysteine-inducible, endoplasmic reticulum stress-inducible, ubiquitin-like domain member 1 | 2.28  |
| Hey1      | hairly/enhancer-of-split related with YRPW motif 1                                             | 2.26  |
| Hey2      | hairly/enhancer-of-split related with YRPW motif 2                                             | 2.07  |
| Hhex      | hematopoietically expressed homeobox                                                           | 1.94  |
| Hk3       | hexokinase 3 (white cell)                                                                      | 2.13  |
| Hlxb9     | homeobox gene HB9                                                                              | 3.06  |
| Hmga1     | high mobility group AT-hook 1                                                                  | 2.44  |
| Hmgb1-ps2 | high mobility group box 1, pseudogene 2                                                        | 2.20  |
| Hmgcs2    | 3-hydroxy-3-methylglutaryl-CoA synthase 2 (mitochondrial)                                      | 1.92  |
| Hnrp11    | heterogeneous nuclear ribonucleoprotein L-like                                                 | 2.26  |
| Hook1     | hook homolog 1 (Drosophila)                                                                    | 1.89  |
| Hook2     | hook homolog 2 (Drosophila)                                                                    | 1.90  |
| Hopx      | HOP homeobox                                                                                   | 4.17  |
| Hoxb4     | homeo box B4                                                                                   | 2.03  |
| Hoxc6     | homeo box C6                                                                                   | 2.41  |
| Hoxd4     | homeo box D4                                                                                   | 1.94  |
| Hp        | haptoglobin                                                                                    | 1.86  |
| Hpcal1    | hippocalcin-like 1                                                                             | 2.02  |
| Hps4      | Hermansky-Pudlak syndrome 4                                                                    | 1.86  |
| Hrc       | histidine rich calcium binding protein                                                         | 3.30  |
| Hrk       | harakiri, BCL2 interacting protein (contains only BH3 domain)                                  | 13.02 |
| Hs1bp3    | HCLS1 binding protein 3                                                                        | 1.84  |
| Hs2st1    | heparan sulfate 2-O-sulfotransferase 1                                                         | 1.83  |
| Hs3st3a1  | heparan sulfate (glucosamine) 3-O-sulfotransferase 3A1                                         | 3.80  |
| Hs3st6    | heparan sulfate (glucosamine) 3-O-sulfotransferase 6                                           | 3.58  |
| Hs3st6    | heparan sulfate (glucosamine) 3-O-sulfotransferase 6                                           | 3.62  |
| Hsd11b1   | hydroxysteroid 11-beta dehydrogenase 1                                                         | 4.96  |
| Hsd11b2   | hydroxysteroid 11-beta dehydrogenase 2                                                         | 2.36  |
| Hsd17b1   | hydroxysteroid (17-beta) dehydrogenase 1                                                       | 2.52  |
| Hsd3b1    | hydroxy-delta-5-steroid dehydrogenase, 3 beta- and steroid delta-isomerase 1                   | 2.71  |
| Hsd3b6    | hydroxy-delta-5-steroid dehydrogenase, 3 beta- and steroid delta-isomerase 6                   | 2.27  |
| Hspa1b    | heat shock 70kD protein 1B (mapped)                                                            | 1.78  |
| Hspa4l    | heat shock protein 4-like                                                                      | 2.83  |
| Htatip2   | HIV-1 Tat interactive protein 2                                                                | 2.35  |
| Ick       | intestinal cell kinase                                                                         | 2.33  |
| Ifi204    | interferon activated gene 204                                                                  | 3.71  |
| Ifi2712b  | interferon, alpha-inducible protein 27 like 2B                                                 | 4.06  |

|          |                                                                 |       |
|----------|-----------------------------------------------------------------|-------|
| Ifi2712b | interferon, alpha-inducible protein 27 like 2B                  | 3.63  |
| Ifit3    | interferon-induced protein with tetratricopeptide repeats 3     | 7.66  |
| Igfbp1b  | immunoglobulin (CD79A) binding protein 1b                       | 2.13  |
| Igf2     | insulin-like growth factor 2                                    | 4.42  |
| Igf2bp2  | insulin-like growth factor 2 mRNA binding protein 2             | 2.24  |
| Igf2r    | insulin-like growth factor 2 receptor                           | 1.91  |
| Igfals   | insulin-like growth factor binding protein, acid labile subunit | 2.08  |
| Igfbp2   | insulin-like growth factor binding protein 2                    | 2.49  |
| Igfbp5   | insulin-like growth factor binding protein 5                    | 3.71  |
| Igfbpl1  | insulin-like growth factor binding protein-like 1               | 5.99  |
| Igll1    | immunoglobulin lambda-like polypeptide 1                        | 2.73  |
| Ihh      | Indian hedgehog                                                 | 2.65  |
| Ikbip    | IKBKB interacting protein                                       | 1.74  |
| Ikzf5    | IKAROS family zinc finger 5                                     | 2.12  |
| Ikzf5    | IKAROS family zinc finger 5                                     | 1.76  |
| Il18     | interleukin 18                                                  | 2.80  |
| Il18r1   | interleukin 18 receptor 1                                       | 1.85  |
| Il1r1    | interleukin 1 receptor, type I                                  | 3.64  |
| Il1r2    | interleukin 1 receptor, type II                                 | 2.52  |
| Il1rn    | interleukin 1 receptor antagonist                               | 3.10  |
| Il34     | interleukin 34                                                  | 4.17  |
| Il36b    | interleukin 36, beta                                            | 2.72  |
| Il36rn   | interleukin 36 receptor antagonist                              | 2.42  |
| Il6r     | interleukin 6 receptor                                          | 3.75  |
| Impact   | imprinted and ancient                                           | 2.44  |
| Inhba    | inhibin beta-A                                                  | 2.39  |
| Inhbb    | inhibin beta-B                                                  | 2.42  |
| Insig2   | insulin induced gene 2                                          | 1.86  |
| Insr     | insulin receptor                                                | 2.70  |
| Insr     | insulin receptor                                                | 2.80  |
| Ints12   | integrator complex subunit 12                                   | 1.77  |
| Iqcb1    | IQ motif containing B1                                          | 1.81  |
| Irak2    | interleukin-1 receptor-associated kinase 2                      | 1.85  |
| Irf4     | interferon regulatory factor 4                                  | 2.03  |
| Irf6     | interferon regulatory factor 6                                  | 2.20  |
| Irf8     | interferon regulatory factor 8                                  | 2.03  |
| Irgm     | immunity-related GTPase family, M                               | 3.04  |
| Isg20    | interferon stimulated exonuclease gene 20                       | 3.74  |
| Ism1     | isthmin 1 homolog (zebrafish)                                   | 4.15  |
| Isoc1    | isochorismatase domain containing 1                             | 2.18  |
| Itga1    | integrin, alpha 1                                               | 2.10  |
| Itga10   | integrin, alpha 10                                              | 1.82  |
| Itga2b   | integrin, alpha 2B                                              | 1.92  |
| Itga6    | integrin, alpha 6                                               | 2.12  |
| Itga8    | integrin, alpha 8                                               | 17.41 |

|          |                                                                           |      |
|----------|---------------------------------------------------------------------------|------|
| Itgb1bp2 | integrin beta 1 binding protein 2                                         | 2.74 |
| Itgb4    | integrin, beta 4                                                          | 1.82 |
| Itgb7    | integrin, beta 7                                                          | 2.55 |
| Itih4    | inter-alpha-trypsin inhibitor heavy chain family, member 4                | 3.08 |
| Itnl1    | intelectin 1 (galactofuranose binding)                                    | 7.35 |
| Itpka    | inositol-trisphosphate 3-kinase A                                         | 1.85 |
| Jakmip1  | janus kinase and microtubule interacting protein 1                        | 5.75 |
| Jakmip2  | janus kinase and microtubule interacting protein 2                        | 4.05 |
| Kank3    | KN motif and ankyrin repeat domains 3                                     | 2.17 |
| Kat6a    | K(lysine) acetyltransferase 6A                                            | 2.36 |
| Kazald1  | Kazal-type serine peptidase inhibitor domain 1                            | 2.29 |
| Kazn     | kazrin, periplakin interacting protein                                    | 2.50 |
| Kazn     | kazrin, periplakin interacting protein                                    | 3.71 |
| Kcna6    | potassium voltage gated channel, shaker related subfamily, member 6       | 1.98 |
| Kcnb1    | potassium voltage gated channel, Shab-related subfamily, member 1         | 2.15 |
| Kcnc3    | potassium voltage gated channel, Shaw-related subfamily, member 3         | 2.72 |
| Kcne2    | potassium voltage-gated channel, Isk-related family, member 2             | 2.03 |
| Kcng1    | potassium voltage-gated channel, subfamily G, member 1                    | 7.01 |
| Kcng1    | potassium voltage-gated channel, subfamily G, member 1                    | 1.79 |
| Kcnh1    | potassium voltage-gated channel, subfamily H (eag-related), member 1      | 4.82 |
| Kcnh2    | potassium voltage-gated channel, subfamily H (eag-related), member 2      | 3.64 |
| Kcnh3    | potassium voltage-gated channel, subfamily H (eag-related), member 3      | 2.38 |
| Kcnh4    | potassium voltage-gated channel, subfamily H (eag-related), member 4      | 1.81 |
| Kcnh6    | potassium voltage-gated channel, subfamily H (eag-related), member 6      | 1.92 |
| Kcnj12   | potassium inwardly-rectifying channel, subfamily J, member 12             | 1.91 |
| Kcnj4    | potassium inwardly-rectifying channel, subfamily J, member 4              | 8.87 |
| Kcnq1    | potassium voltage-gated channel, KQT-like subfamily, member 1             | 1.82 |
| Kcns1    | potassium voltage-gated channel, delayed-rectifier, subfamily S, member 1 | 3.05 |
| Kcnt1    | potassium channel, subfamily T, member 1                                  | 2.60 |
| Kctd13   | potassium channel tetramerisation domain containing 13                    | 2.31 |
| Kctd19   | potassium channel tetramerisation domain containing 19                    | 1.84 |
| Kctd3    | potassium channel tetramerisation domain containing 3                     | 1.90 |
| Kdr      | kinase insert domain receptor                                             | 4.30 |
| Kdsr     | 3-ketodihydrosphingosine reductase                                        | 2.44 |
| Kif13a   | kinesin family member 13A                                                 | 2.02 |
| Kif26a   | kinesin family member 26A                                                 | 1.78 |
| KIFC2    | kinesin family member C2                                                  | 2.32 |
| Kit      | v-kit Hardy-Zuckerman 4 feline sarcoma viral oncogene homolog             | 1.91 |
| Kitlg    | KIT ligand                                                                | 6.12 |
| Klf1     | Kruppel-like factor 1 (erythroid)                                         | 2.26 |
| Klf11    | Kruppel-like factor 11                                                    | 2.10 |
| Klf14    | Kruppel-like factor 14                                                    | 7.24 |
| Klf15    | Kruppel-like factor 15                                                    | 2.83 |
| Klf2     | Kruppel-like factor 2 (lung)                                              | 3.26 |
| Klf3     | Kruppel-like factor 3 (basic)                                             | 1.78 |

|           |                                                          |       |
|-----------|----------------------------------------------------------|-------|
| Klf4      | Kruppel-like factor 4 (gut)                              | 1.84  |
| Klf5      | Kruppel-like factor 5                                    | 2.00  |
| Klf5      | Kruppel-like factor 5                                    | 2.21  |
| Klhl15    | kelch-like 15 (Drosophila)                               | 2.05  |
| Klhl21    | kelch-like 21 (Drosophila)                               | 1.76  |
| Klhl35    | kelch-like 35 (Drosophila)                               | 1.92  |
| Klhl38    | kelch-like 38 (Drosophila)                               | 1.88  |
| Klhl41    | kelch-like 41 (Drosophila)                               | 1.85  |
| Klhl8     | kelch-like 8 (Drosophila)                                | 1.77  |
| Klk13     | kallikrein related-peptidase 13                          | 5.54  |
| Klk8      | kallikrein related-peptidase 8                           | 2.86  |
| Klre1     | killer cell lectin-like receptor, family E, member 1     | 3.06  |
| Kptn      | kaptin (actin binding protein)                           | 1.79  |
| Krt15     | keratin 15                                               | 2.49  |
| Krt23     | keratin 23 (histone deacetylase inducible)               | 3.61  |
| Krt25     | keratin 25                                               | 2.42  |
| Krt76     | keratin 76                                               | 5.46  |
| Krt81     | keratin 81                                               | 2.44  |
| Krt83     | keratin 83                                               | 2.21  |
| Krtap1-3  | keratin associated protein 1-3                           | 2.67  |
| Krtap16-5 | keratin associated protein 16-5                          | 1.75  |
| L1cam     | L1 cell adhesion molecule                                | 2.19  |
| L3mbtl3   | l(3)mbt-like 3 (Drosophila)                              | 2.68  |
| Lacc1     | laccase (multicopper oxidoreductase) domain containing 1 | 3.77  |
| Lamc2     | laminin, gamma 2                                         | 3.62  |
| Lats1     | LATS, large tumor suppressor, homolog 1 (Drosophila)     | 2.88  |
| Lcat      | lecithin cholesterol acyltransferase                     | 2.05  |
| Lcor      | ligand dependent nuclear receptor corepressor            | 2.18  |
| Lcorl     | ligand dependent nuclear receptor corepressor-like       | 1.76  |
| Lcp2      | lymphocyte cytosolic protein 2                           | 3.05  |
| Lct       | lactase                                                  | 1.88  |
| Ldhb      | lactate dehydrogenase B                                  | 45.99 |
| Ldhc      | lactate dehydrogenase C                                  | 2.71  |
| Lgals3    | lectin, galactoside-binding, soluble, 3                  | 4.58  |
| Lgals3bp  | lectin, galactoside-binding, soluble, 3 binding protein  | 1.88  |
| Lgals5    | lectin, galactose binding, soluble 5                     | 6.77  |
| Lgals7    | lectin, galactoside-binding, soluble, 7                  | 3.63  |
| Lgals9    | lectin, galactoside-binding, soluble, 9                  | 9.26  |
| Lgi4      | leucine-rich repeat LGI family, member 4                 | 2.27  |
| Lhb       | luteinizing hormone beta                                 | 1.95  |
| Lhx2      | LIM homeobox 2                                           | 1.88  |
| Lhx4      | LIM homeobox 4                                           | 4.78  |
| Lif       | leukemia inhibitory factor                               | 1.78  |
| Lime1     | Lck interacting transmembrane adaptor 1                  | 1.77  |
| Lims2     | LIM and senescent cell antigen like domains 2            | 2.25  |

|         |                                                                     |      |
|---------|---------------------------------------------------------------------|------|
| Lin28a  | lin-28 homolog A ( <i>C. elegans</i> )                              | 2.09 |
| Lin7b   | lin-7 homolog b ( <i>C. elegans</i> )                               | 2.05 |
| Lipa    | lipase A, lysosomal acid, cholesterol esterase                      | 1.86 |
| Liph    | lipase, member H                                                    | 5.25 |
| Lix1    | Lix1 homolog (chicken)                                              | 3.32 |
| Lmo1    | LIM domain only 1                                                   | 2.01 |
| Lmo4    | LIM domain only 4                                                   | 2.35 |
| Lmo7    | LIM domain 7                                                        | 1.90 |
| Lmo7    | LIM domain 7                                                        | 2.03 |
| Lmod1   | leiomodulin 1 (smooth muscle)                                       | 1.84 |
| Lonrf1  | LON peptidase N-terminal domain and ring finger 1                   | 2.03 |
| Lpar2   | lysophosphatidic acid receptor 2                                    | 2.67 |
| Lpar3   | lysophosphatidic acid receptor 3                                    | 3.31 |
| Lpgat1  | lysophosphatidylglycerol acyltransferase 1                          | 1.95 |
| Lppr3   | lipid phosphate phosphatase-related protein type 3                  | 6.03 |
| Lrch1   | leucine-rich repeats and calponin homology (CH) domain containing 1 | 1.81 |
| Lrfn3   | leucine rich repeat and fibronectin type III domain containing 3    | 1.99 |
| Lrp3    | low density lipoprotein receptor-related protein 3                  | 2.89 |
| Lrp4    | low density lipoprotein receptor-related protein 4                  | 3.56 |
| Lrrc1   | leucine rich repeat containing 1                                    | 2.11 |
| Lrrc15  | leucine rich repeat containing 15                                   | 7.10 |
| Lrrc16b | leucine rich repeat containing 16B                                  | 2.82 |
| Lrrc23  | leucine rich repeat containing 23                                   | 3.53 |
| Lrrc37a | leucine rich repeat containing 37A                                  | 1.74 |
| Lrrc58  | leucine rich repeat containing 58                                   | 1.90 |
| Lrrc8b  | leucine rich repeat containing 8 family, member B                   | 2.65 |
| Lrrk1   | leucine-rich repeat kinase 1                                        | 2.36 |
| Lrrn4cl | LRRN4 C-terminal like                                               | 2.77 |
| Lrrn4cl | LRRN4 C-terminal like                                               | 2.03 |
| Ltb     | lymphotoxin beta (TNF superfamily, member 3)                        | 1.98 |
| Ly6d    | lymphocyte antigen 6 complex, locus D                               | 2.61 |
| Ly6g5b  | lymphocyte antigen 6 complex, locus G5B                             | 1.94 |
| Ly6i    | lymphocyte antigen 6 complex, locus I                               | 4.92 |
| Ly96    | lymphocyte antigen 96                                               | 1.95 |
| Ly96    | lymphocyte antigen 96                                               | 2.10 |
| Lyl1    | lymphoblastic leukemia derived sequence 1                           | 1.90 |
| Lynx1   | Ly6/neurotoxin 1                                                    | 4.06 |
| Lypd3   | Ly6/Plaur domain containing 3                                       | 3.12 |
| Lym9    | LYR motif containing 9                                              | 1.84 |
| Lyz2    | lysozyme 2                                                          | 3.38 |
| Lyz14   | lysozyme-like 4                                                     | 2.54 |
| Lzts1   | leucine zipper, putative tumor suppressor 1                         | 1.91 |
| Macro1  | MACRO domain containing 1                                           | 2.78 |
| Mafa    | v-maf musculoaponeurotic fibrosarcoma oncogene homolog A (avian)    | 2.19 |
| Maff    | v-maf musculoaponeurotic fibrosarcoma oncogene homolog F (avian)    | 2.62 |

|          |                                                                  |       |
|----------|------------------------------------------------------------------|-------|
| Mafg     | v-maf musculoaponeurotic fibrosarcoma oncogene homolog G (avian) | 1.86  |
| Mafk     | v-maf musculoaponeurotic fibrosarcoma oncogene homolog K (avian) | 2.05  |
| Mageb18  | melanoma antigen family B, 18                                    | 7.23  |
| Mageb7   | melanoma antigen, family B, 7                                    | 2.99  |
| Magix    | MAGI family member, X-linked                                     | 2.27  |
| Mak      | male germ cell-associated kinase                                 | 3.39  |
| Maml1    | mastermind like 1 (Drosophila)                                   | 2.79  |
| Man2b2   | mannosidase, alpha, class 2B, member 2                           | 1.94  |
| Manba    | mannosidase, beta A, lysosomal                                   | 4.55  |
| Map1b    | microtubule-associated protein 1B                                | 3.24  |
| Map3k13  | mitogen-activated protein kinase kinase kinase 13                | 2.68  |
| Map3k2   | mitogen activated protein kinase kinase kinase 2                 | 2.42  |
| Map7     | microtubule-associated protein 7                                 | 2.82  |
| Mapk1ip1 | mitogen-activated protein kinase 1 interacting protein 1         | 1.75  |
| Mapk8ip3 | mitogen-activated protein kinase 8 interacting protein 3         | 2.54  |
| Mapkbp1  | mitogen activated protein kinase binding protein 1               | 2.06  |
| Mapre3   | microtubule-associated protein, RP/EB family, member 3           | 1.88  |
| Mapt     | microtubule-associated protein tau                               | 2.77  |
| Mapt     | microtubule-associated protein tau                               | 2.36  |
| Mars2    | methionyl-tRNA synthetase 2, mitochondrial                       | 2.05  |
| Mas1     | MAS1 oncogene                                                    | 2.16  |
| MAST1    | microtubule associated serine/threonine kinase 1                 | 4.65  |
| Mat2b    | methionine adenosyltransferase II, beta                          | 1.85  |
| Mb21d2   | Mab-21 domain containing 2                                       | 4.33  |
| Mbnl1    | muscleblind-like 1 (Drosophila)                                  | 2.09  |
| Mbp      | myelin basic protein                                             | 3.44  |
| Mcpt8    | mast cell protease 8                                             | 2.15  |
| Mdfic    | MyoD family inhibitor domain containing                          | 1.90  |
| Mdm2     | p53 E3 ubiquitin protein ligase                                  | 2.94  |
| Mdm2     | p53 E3 ubiquitin protein ligase                                  | 3.11  |
| Mdm4     | Mdm4 p53 binding protein homolog (mouse)                         | 2.25  |
| Mecp2    | methyl CpG binding protein 2                                     | 3.21  |
| Med15    | mediator complex subunit 15                                      | 2.70  |
| Medag    | mesenteric estrogen-dependent adipogenesis                       | 2.88  |
| Mef2b    | myocyte enhancer factor 2B                                       | 3.52  |
| Meig1    | meiosis expressed gene 1                                         | 1.95  |
| Meox1    | mesenchyme homeobox 1                                            | 2.97  |
| Mep1b    | meprip 1 beta                                                    | 5.48  |
| Mepe     | matrix extracellular phosphoglycoprotein                         | 5.12  |
| Mepe     | matrix extracellular phosphoglycoprotein                         | 4.16  |
| Mertk    | c-mer proto-oncogene tyrosine kinase                             | 3.65  |
| Mest     | mesoderm specific transcript homolog (mouse)                     | 2.55  |
| Mettl8   | methyltransferase like 8                                         | 2.14  |
| Mfap5    | microfibrillar associated protein 5                              | 11.42 |
| Mfng     | MFNG O-fucosylpeptide 3-beta-N-acetylglucosaminyltransferase     | 2.98  |



|         |                                                                                         |       |
|---------|-----------------------------------------------------------------------------------------|-------|
| Mfsd2a  | major facilitator superfamily domain containing 2A                                      | 1.87  |
| Mfsd6   | major facilitator superfamily domain containing 6                                       | 2.87  |
| Mfsd7   | major facilitator superfamily domain containing 7                                       | 2.10  |
| Mfsd7   | major facilitator superfamily domain containing 7                                       | 2.49  |
| Mgarp   | mitochondria-localized glutamic acid-rich protein                                       | 2.22  |
| Mgarp   | mitochondria-localized glutamic acid-rich protein                                       | 1.88  |
| Mgat5b  | mannosyl (alpha-1,6-)-glycoprotein beta-1,6-N-acetyl-glucosaminyltransferase, isozyme B | 5.55  |
| Mgea5   | meningioma expressed antigen 5 (hyaluronidase)                                          | 1.99  |
| Mgmt    | O-6-methylguanine-DNA methyltransferase                                                 | 13.31 |
| Mgst2   | microsomal glutathione S-transferase 2                                                  | 2.11  |
| Mgst3   | microsomal glutathione S-transferase 3                                                  | 7.55  |
| Mia     | melanoma inhibitory activity                                                            | 6.26  |
| Micalcl | MICAL C-terminal like                                                                   | 2.40  |
| Micb    | MHC class I polypeptide-related sequence B                                              | 1.95  |
| Mink1   | misshapen-like kinase 1                                                                 | 1.76  |
| Miox    | myo-inositol oxygenase                                                                  | 2.91  |
| Mlana   | melan-A                                                                                 | 3.83  |
| Mmp17   | matrix metalloproteinase 17                                                             | 10.06 |
| Mmp2    | matrix metalloproteinase 2                                                              | 4.03  |
| Mmp28   | matrix metalloproteinase 28                                                             | 2.05  |
| Mmp7    | matrix metalloproteinase 7                                                              | 6.10  |
| Mocos   | molybdenum cofactor sulfurase                                                           | 2.12  |
| Mogat1  | monoacylglycerol O-acyltransferase 1                                                    | 2.48  |
| Morn5   | MORN repeat containing 5                                                                | 1.77  |
| Mpa2l   | macrophage activation 2 like                                                            | 3.05  |
| Mpp3    | membrane protein, palmitoylated 3 (MAGUK p55 subfamily member 3)                        | 2.57  |
| Mpp3    | membrane protein, palmitoylated 3 (MAGUK p55 subfamily member 3)                        | 2.85  |
| Mpp4    | membrane protein, palmitoylated 4 (MAGUK p55 subfamily member 4)                        | 2.66  |
| Mpped1  | metallophosphoesterase domain containing 1                                              | 1.90  |
| Mpzl2   | myelin protein zero-like 2                                                              | 5.18  |
| Mr1     | major histocompatibility complex, class I-related                                       | 2.56  |
| Mrap2   | melanocortin 2 receptor accessory protein 2                                             | 3.16  |
| Mreg    | melanoregulin                                                                           | 1.84  |
| Mro     | maestro                                                                                 | 32.58 |
| Mroh7   | maestro heat-like repeat family member 7                                                | 6.68  |
| Mrps27  | mitochondrial ribosomal protein S27                                                     | 1.90  |
| Ms4a11  | membrane-spanning 4-domains, subfamily A, member 11                                     | 4.52  |
| Msantd1 | Myb/SANT-like DNA-binding domain containing 1                                           | 3.19  |
| Msantd3 | Myb/SANT-like DNA-binding domain containing 3                                           | 2.63  |
| Msh5    | mutS homolog 5 (E. coli)                                                                | 4.91  |
| Msl2    | male-specific lethal 2 homolog (Drosophila)                                             | 1.86  |
| Mt1a    | metallothionein 1a                                                                      | 3.92  |
| Mt2A    | metallothionein 2A                                                                      | 1.98  |
| Mt3     | metallothionein 3                                                                       | 14.42 |

|          |                                                                                                      |      |
|----------|------------------------------------------------------------------------------------------------------|------|
| Mterfd3  | MTERF domain containing 3                                                                            | 1.94 |
| Mthfd2   | methylenetetrahydrofolate dehydrogenase (NADP+ dependent) 2, methenyltetrahydrofolate cyclohydrolase | 2.22 |
| Mthfd2   | methylenetetrahydrofolate dehydrogenase (NADP+ dependent) 2, methenyltetrahydrofolate cyclohydrolase | 2.04 |
| Mtmr10   | myotubularin related protein 10                                                                      | 3.28 |
| Mtmr3    | myotubularin related protein 3                                                                       | 1.82 |
| Mtss1    | metastasis suppressor 1                                                                              | 2.08 |
| Mtss11   | metastasis suppressor 1-like                                                                         | 2.11 |
| Mtus1    | microtubule associated tumor suppressor 1                                                            | 2.77 |
| Mtus1    | microtubule associated tumor suppressor 1                                                            | 4.28 |
| Mxi1     | MAX interactor 1                                                                                     | 1.99 |
| Mybl1    | myeloblastosis oncogene-like 1                                                                       | 3.01 |
| Mycbpap  | Mycbp associated protein                                                                             | 6.59 |
| Myh13    | myosin, heavy chain 13, skeletal muscle                                                              | 3.02 |
| Myh3     | myosin, heavy chain 3, skeletal muscle, embryonic                                                    | 2.71 |
| Myh3     | myosin, heavy chain 3, skeletal muscle, embryonic                                                    | 2.22 |
| Myh6     | myosin, heavy chain 6, cardiac muscle, alpha                                                         | 2.04 |
| Myh7     | myosin, heavy chain 7, cardiac muscle, beta                                                          | 1.92 |
| Myh8     | myosin, heavy chain 8, skeletal muscle, perinatal                                                    | 2.36 |
| Myliip   | myosin regulatory light chain interacting protein                                                    | 2.65 |
| Mylk     | myosin light chain kinase                                                                            | 2.67 |
| Mylk     | myosin light chain kinase                                                                            | 3.28 |
| Mylk2    | myosin light chain kinase 2                                                                          | 2.41 |
| Mylk3    | myosin light chain kinase 3                                                                          | 2.43 |
| Myo1e    | myosin IE                                                                                            | 1.87 |
| Myo1g    | myosin IG                                                                                            | 3.26 |
| Myo5a    | myosin VA                                                                                            | 2.30 |
| Myo7a    | myosin VIIA                                                                                          | 2.14 |
| Myoc     | myocilin                                                                                             | 2.23 |
| Myoz1    | myozenin 1                                                                                           | 2.17 |
| N4bp211  | NEDD4 binding protein 2-like 1                                                                       | 2.50 |
| Naalad11 | N-acetylated alpha-linked acidic dipeptidase-like 1                                                  | 1.89 |
| Naf1     | nuclear assembly factor 1 homolog (S. cerevisiae)                                                    | 2.10 |
| Naglu    | N-acetylglucosaminidase, alpha                                                                       | 1.95 |
| Naprt1   | nicotinate phosphoribosyltransferase domain containing 1                                             | 2.21 |
| Napsa    | napsin A aspartic peptidase                                                                          | 4.84 |
| Nat8b    | N-acetyltransferase 8B                                                                               | 1.97 |
| Nat8l    | N-acetyltransferase 8-like                                                                           | 6.43 |
| Ncam1    | neural cell adhesion molecule 1                                                                      | 1.89 |
| Ncf1     | neutrophil cytosolic factor 1                                                                        | 1.91 |
| Ncf4     | neutrophil cytosolic factor 4                                                                        | 3.33 |
| Ndn      | necdin, melanoma antigen (MAGE) family member                                                        | 3.12 |
| Ndr4     | N-myc downstream regulated gene 4                                                                    | 1.88 |
| Necab3   | N-terminal EF-hand calcium binding protein 3                                                         | 2.96 |

|        |                                                                                     |       |
|--------|-------------------------------------------------------------------------------------|-------|
| Nek5   | NIMA-related kinase 5                                                               | 1.94  |
| Neur1  | neuralized homolog (Drosophila)                                                     | 1.83  |
| Nexn   | nexilin (F actin binding protein)                                                   | 4.46  |
| Nf1    | neurofibromin 1                                                                     | 2.06  |
| Nfat5  | nuclear factor of activated T-cells 5                                               | 2.60  |
| Nfatc2 | nuclear factor of activated T-cells, cytoplasmic, calcineurin-dependent 2           | 2.52  |
| Nfe2   | nuclear factor, erythroid derived 2                                                 | 3.62  |
| Nfkbid | nuclear factor of kappa light polypeptide gene enhancer in B-cells inhibitor, delta | 1.89  |
| Nfxl1  | nuclear transcription factor, X-box binding-like 1                                  | 1.75  |
| Ngfr   | nerve growth factor receptor                                                        | 12.66 |
| Nhej1  | nonhomologous end-joining factor 1                                                  | 2.10  |
| Nhlrc1 | NHL repeat containing 1                                                             | 1.99  |
| Nkain1 | Na <sup>+</sup> /K <sup>+</sup> transporting ATPase interacting 1                   | 2.10  |
| Nkd2   | naked cuticle homolog 2 (Drosophila)                                                | 3.55  |
| Nkd2   | naked cuticle homolog 2 (Drosophila)                                                | 3.68  |
| Nkpd1  | NTPase, KAP family P-loop domain containing 1                                       | 2.44  |
| Nkx2-5 | NK2 homeobox 5                                                                      | 2.33  |
| Nlrp4  | NLR family, pyrin domain containing 4                                               | 1.77  |
| Nlrp5  | NLR family, pyrin domain containing 5                                               | 4.44  |
| Nnmt   | nicotinamide N-methyltransferase                                                    | 1.84  |
| Nol4   | nucleolar protein 4                                                                 | 1.76  |
| Nos2   | nitric oxide synthase 2, inducible                                                  | 2.97  |
| Npas1  | neuronal PAS domain protein 1                                                       | 1.98  |
| Npc1   | Niemann-Pick disease, type C1                                                       | 2.03  |
| Nphs1  | nephrosis 1, congenital, Finnish type (nephrin)                                     | 2.52  |
| Npm2   | nucleophosmin/nucleoplasmin 2                                                       | 2.21  |
| Nptxr  | neuronal pentraxin receptor                                                         | 2.78  |
| Nptxr  | neuronal pentraxin receptor                                                         | 3.72  |
| Npw    | neuropeptide W                                                                      | 2.65  |
| Npy    | neuropeptide Y                                                                      | 7.90  |
| Npy    | neuropeptide Y                                                                      | 7.70  |
| Nqo1   | NAD(P)H dehydrogenase, quinone 1                                                    | 6.22  |
| Nr1d1  | nuclear receptor subfamily 1, group D, member 1                                     | 6.22  |
| Nr1d2  | nuclear receptor subfamily 1, group D, member 2                                     | 2.66  |
| Nr1h3  | nuclear receptor subfamily 1, group H, member 3                                     | 2.17  |
| Nr1h4  | nuclear receptor subfamily 1, group H, member 4                                     | 4.39  |
| Nr2f1  | nuclear receptor subfamily 2, group F, member 1                                     | 1.75  |
| Nr3c2  | nuclear receptor subfamily 3, group C, member 2                                     | 5.79  |
| Nr4a3  | nuclear receptor subfamily 4, group A, member 3                                     | 3.96  |
| Nr6a1  | nuclear receptor subfamily 6, group A, member 1                                     | 2.97  |
| Nrap   | nebulin-related anchoring protein                                                   | 3.16  |
| Nrap   | Notch-regulated ankyrin repeat protein                                              | 3.40  |
| Nrg1   | neuregulin 1                                                                        | 4.92  |
| Nrgn   | neurogranin                                                                         | 2.99  |
| Nrip1  | nuclear receptor interacting protein 1                                              | 5.11  |

|         |                                                                 |       |
|---------|-----------------------------------------------------------------|-------|
| Nrip3   | nuclear receptor interacting protein 3                          | 1.91  |
| Nrn1    | neurtin 1                                                       | 2.44  |
| Nrn11   | neurtin 1-like                                                  | 1.93  |
| Nrp2    | neuropilin 2                                                    | 2.04  |
| Nrtn    | neurturin                                                       | 1.86  |
| Nsd1    | nuclear receptor binding SET domain protein 1                   | 2.03  |
| Nsg2    | neuron specific gene family member 2                            | 4.19  |
| Nsmaf   | neutral sphingomyelinase (N-SMase) activation associated factor | 1.88  |
| Nt5dc3  | 5'-nucleotidase domain containing 3                             | 2.59  |
| Ntrk1   | neurotrophic tyrosine kinase, receptor, type 1                  | 4.41  |
| Ntsr1   | neurotensin receptor 1                                          | 2.50  |
| Nudt7   | nudix (nucleoside diphosphate linked moiety X)-type motif 7     | 3.53  |
| Nup210  | nucleoporin 210                                                 | 2.01  |
| Nupr1   | nuclear protein, transcriptional regulator, 1                   | 2.47  |
| Nxf7    | nuclear RNA export factor 7                                     | 11.89 |
| Nxnl2   | nucleoredoxin-like 2                                            | 2.34  |
| Nxnl2   | nucleoredoxin-like 2                                            | 2.37  |
| Nxph3   | neurexophilin 3                                                 | 3.29  |
| Nxph4   | neurexophilin 4                                                 | 4.28  |
| Oas1a   | 2'-5' oligoadenylate synthetase 1A                              | 2.04  |
| Oas1e   | 2'-5' oligoadenylate synthetase 1E                              | 2.05  |
| Oas1h   | 2'-5' oligoadenylate synthetase 1H                              | 5.49  |
| Oas1k   | 2'-5' oligoadenylate synthetase 1K                              | 2.02  |
| Oas2    | 2'-5' oligoadenylate synthetase 2                               | 2.08  |
| Oasl    | 2'-5'-oligoadenylate synthetase-like                            | 5.69  |
| Obox5   | oocyte specific homeobox 5                                      | 3.14  |
| Ocm     | oncomodulin                                                     | 4.66  |
| Ocm     | oncomodulin                                                     | 3.96  |
| Ocrl    | oculocerebrorenal syndrome of Lowe                              | 2.35  |
| Odc1    | ornithine decarboxylase 1                                       | 1.78  |
| Odf3b   | outer dense fiber of sperm tails 3B                             | 1.78  |
| Olfml2a | olfactomedin-like 2A                                            | 6.08  |
| Olr1    | oxidized low density lipoprotein (lectin-like) receptor 1       | 2.54  |
| Olr1555 | olfactory receptor 1555                                         | 1.84  |
| Olr165  | olfactory receptor 165                                          | 2.01  |
| Olr237  | olfactory receptor 237                                          | 1.98  |
| Olr402  | olfactory receptor 402                                          | 2.22  |
| Olr403  | olfactory receptor 403                                          | 2.15  |
| Olr425  | olfactory receptor 425                                          | 1.88  |
| Olr472  | olfactory receptor 472                                          | 1.90  |
| Olr714  | olfactory receptor 714                                          | 1.75  |
| Olr752  | olfactory receptor 752                                          | 1.84  |
| Olr791  | olfactory receptor 791                                          | 1.97  |
| Olr922  | olfactory receptor 922                                          | 1.92  |
| Onecut1 | one cut homeobox 1                                              | 5.80  |

|          |                                                           |      |
|----------|-----------------------------------------------------------|------|
| Onecut2  | one cut homeobox 2                                        | 2.68 |
| Osbpl10  | oxysterol binding protein-like 10                         | 2.26 |
| Osgin1   | oxidative stress induced growth inhibitor 1               | 5.33 |
| Osr2     | odd-skipped related 2 (Drosophila)                        | 2.96 |
| Ostm1    | osteopetrosis associated transmembrane protein 1          | 1.86 |
| Otos     | otospiralin                                               | 1.85 |
| Otud1    | OTU domain containing 1                                   | 2.82 |
| Ovol2    | ovo-like 2 (Drosophila)                                   | 3.33 |
| Pacsin1  | protein kinase C and casein kinase substrate in neurons 1 | 2.04 |
| Padi2    | peptidyl arginine deiminase, type II                      | 5.06 |
| Pak3     | p21 protein (Cdc42/Rac)-activated kinase 3                | 2.90 |
| Papolb   | poly (A) polymerase beta (testis specific)                | 1.94 |
| Pard3b   | par-3 partitioning defective 3 homolog B (C. elegans)     | 3.09 |
| Pard6g   | par-6 partitioning defective 6 homolog gamma (C. elegans) | 2.93 |
| Parp11   | poly (ADP-ribose) polymerase family, member 11            | 3.94 |
| Paxbp1   | PAX3 and PAX7 binding protein 1                           | 1.76 |
| Pcdh10   | protocadherin 10                                          | 4.47 |
| Pcdh19   | protocadherin 19                                          | 4.32 |
| Pcdha1   | protocadherin alpha 1                                     | 2.42 |
| Pcdha3   | protocadherin alpha 3                                     | 2.04 |
| Pcdhb15  | protocadherin beta 15                                     | 2.71 |
| Pcdhb19  | protocadherin beta 19                                     | 3.39 |
| Pcdhb22  | protocadherin beta 22                                     | 2.67 |
| Pcdhg@   | protocadherin gamma cluster                               | 2.48 |
| Pcdhga1  | protocadherin gamma subfamily A, 1                        | 1.98 |
| Pcdhga11 | protocadherin gamma subfamily A, 11                       | 2.49 |
| Pcdhga3  | protocadherin gamma subfamily A, 3                        | 2.46 |
| Pcdhgb2  | protocadherin gamma subfamily B, 2                        | 2.08 |
| Pcdhgb5  | protocadherin gamma subfamily B, 5                        | 2.72 |
| Pced1b   | PC-esterase domain containing 1B                          | 3.44 |
| Pcxl2    | pecanex-like 2 (Drosophila)                               | 1.95 |
| Pdcd1    | programmed cell death 1                                   | 1.84 |
| Pde2a    | phosphodiesterase 2A, cGMP-stimulated                     | 6.98 |
| Pde4c    | phosphodiesterase 4C, cAMP-specific                       | 2.24 |
| Pde5a    | phosphodiesterase 5A, cGMP-specific                       | 2.41 |
| Pde6b    | phosphodiesterase 6B, cGMP-specific, rod, beta            | 2.81 |
| Pdgfrb   | platelet derived growth factor receptor, beta polypeptide | 2.19 |
| Pdgfrl   | platelet-derived growth factor receptor-like              | 1.82 |
| Pdia5    | protein disulfide isomerase family A, member 5            | 2.04 |
| Pdx1     | pancreatic and duodenal homeobox 1                        | 2.35 |
| Pdzd4    | PDZ domain containing 4                                   | 1.93 |
| Pecam1   | platelet/endothelial cell adhesion molecule 1             | 1.98 |
| Perp     | PERP, TP53 apoptosis effector                             | 1.99 |
| Pfkfb2   | 6-phosphofructo-2-kinase/fructose-2,6-biphosphatase 2     | 2.70 |
| Pgbd5    | piggyBac transposable element derived 5                   | 2.17 |

|          |                                                                               |      |
|----------|-------------------------------------------------------------------------------|------|
| Pgf      | placental growth factor                                                       | 1.95 |
| Pgf      | placental growth factor                                                       | 2.25 |
| Pgm211   | phosphoglucomutase 2-like 1                                                   | 2.27 |
| Pgm211   | phosphoglucomutase 2-like 1                                                   | 1.81 |
| Phactr1  | phosphatase and actin regulator 1                                             | 2.34 |
| Phc3     | polyhomeotic homolog 3 (Drosophila)                                           | 1.84 |
| Phf11    | PHD finger protein 11                                                         | 2.74 |
| Phf17    | PHD finger protein 17                                                         | 1.97 |
| Phgr1    | proline/histidine/glycine-rich 1                                              | 3.27 |
| Phlda2   | pleckstrin homology-like domain, family A, member 2                           | 2.50 |
| Phlda2   | pleckstrin homology-like domain, family A, member 2                           | 2.42 |
| Phlda3   | pleckstrin homology-like domain, family A, member 3                           | 2.11 |
| Pianp    | PILR alpha associated neural protein                                          | 3.63 |
| Pik3r1   | phosphoinositide-3-kinase, regulatory subunit 1 (alpha)                       | 1.79 |
| Pikfyve  | phosphoinositide kinase, FYVE finger containing                               | 2.12 |
| Pinlyp   | phospholipase A2 inhibitor and LY6/PLAUR domain containing                    | 2.47 |
| Pip4k2a  | phosphatidylinositol-5-phosphate 4-kinase, type II, alpha                     | 2.11 |
| Pip5k1b  | phosphatidylinositol-4-phosphate 5-kinase, type I, beta                       | 1.97 |
| Pitx1    | paired-like homeodomain 1                                                     | 1.75 |
| Pitx3    | paired-like homeodomain 3                                                     | 3.56 |
| Pkd1     | polycystic kidney disease 1 homolog (human)                                   | 1.82 |
| Pkd211   | polycystic kidney disease 2-like 1                                            | 2.75 |
| Pla2g10  | phospholipase A2, group X                                                     | 2.08 |
| Pla2g12a | phospholipase A2, group XIIA                                                  | 1.84 |
| Pla2g15  | phospholipase A2, group XV                                                    | 1.95 |
| Pla2g16  | phospholipase A2, group XVI                                                   | 2.43 |
| Pla2g2a  | phospholipase A2, group IIA (platelets, synovial fluid)                       | 1.81 |
| Pla2g2c  | phospholipase A2, group IIC                                                   | 3.23 |
| Pla2g4d  | phospholipase A2, group IVD (cytosolic)                                       | 3.86 |
| Plac1    | placenta-specific 1                                                           | 2.49 |
| Plac8    | placenta-specific 8                                                           | 3.58 |
| Plagl1   | pleiomorphic adenoma gene-like 1                                              | 4.10 |
| Plagl1   | pleiomorphic adenoma gene-like 1                                              | 2.72 |
| Plat     | plasminogen activator, tissue                                                 | 2.33 |
| Plbd1    | phospholipase B domain containing 1                                           | 1.98 |
| Plcd3    | phospholipase C, delta 3                                                      | 1.84 |
| Plcd4    | phospholipase C, delta 4                                                      | 5.51 |
| Plcd4    | phospholipase C, delta 4                                                      | 4.17 |
| Plcx2    | phosphatidylinositol-specific phospholipase C, X domain containing 2          | 2.13 |
| Plcx2    | phosphatidylinositol-specific phospholipase C, X domain containing 2          | 1.76 |
| Plek2    | pleckstrin 2                                                                  | 4.50 |
| Plekhb1  | pleckstrin homology domain containing, family B (evectins) member 1           | 2.29 |
| Plekhg1  | pleckstrin homology domain containing, family G (with RhoGef domain) member 1 | 4.77 |
| Plekhg1  | pleckstrin homology domain containing, family G (with RhoGef domain)          | 2.76 |

|          |                                                                              |       |
|----------|------------------------------------------------------------------------------|-------|
|          | member 1                                                                     |       |
| Plekhh1  | pleckstrin homology domain containing, family H (with MyTH4 domain) member 1 | 4.10  |
| Plekhh1  | pleckstrin homology domain containing, family H (with MyTH4 domain) member 1 | 3.25  |
| Plk5     | polo-like kinase 5                                                           | 3.83  |
| Pllp     | plasmolipin                                                                  | 11.65 |
| Pln      | phospholamban                                                                | 3.72  |
| Pm20d2   | peptidase M20 domain containing 2                                            | 1.80  |
| Pmel     | premelanosome protein                                                        | 5.20  |
| Pmepa1   | prostate transmembrane protein, androgen induced 1                           | 1.78  |
| Pnkd     | paroxysmal nonkinesigenic dyskinesia                                         | 1.90  |
| Pnmal2   | paraneoplastic Ma antigen family-like 2                                      | 2.57  |
| Pnpla1   | patatin-like phospholipase domain containing 1                               | 2.18  |
| Pnpla7   | patatin-like phospholipase domain containing 7                               | 3.42  |
| Podnl1   | podocan-like 1                                                               | 2.21  |
| Podnl1   | podocan-like 1                                                               | 2.19  |
| Podxl    | podocalyxin-like                                                             | 2.30  |
| Pogz     | pogo transposable element with ZNF domain                                    | 1.86  |
| Pou2af1  | POU class 2 associating factor 1                                             | 1.96  |
| Pou2f1   | POU class 2 homeobox 1                                                       | 2.03  |
| Ppara    | peroxisome proliferator activated receptor alpha                             | 1.85  |
| Ppargc1b | peroxisome proliferator-activated receptor gamma, coactivator 1 beta         | 2.01  |
| Ppip5k1  | diphosphoinositol pentakisphosphate kinase 1                                 | 2.79  |
| Ppip5k1  | diphosphoinositol pentakisphosphate kinase 1                                 | 2.04  |
| Ppm1j    | protein phosphatase, Mg <sup>2+</sup> /Mn <sup>2+</sup> dependent, 1J        | 1.93  |
| Ppm1l    | protein phosphatase, Mg <sup>2+</sup> /Mn <sup>2+</sup> dependent, 1L        | 1.84  |
| Ppm1n    | protein phosphatase, Mg <sup>2+</sup> /Mn <sup>2+</sup> dependent, 1N        | 2.14  |
| Ppp1r14c | protein phosphatase 1, regulatory (inhibitor) subunit 14c                    | 1.87  |
| Ppp1r1a  | protein phosphatase 1, regulatory (inhibitor) subunit 1A                     | 3.56  |
| Ppp1r1a  | protein phosphatase 1, regulatory (inhibitor) subunit 1A                     | 3.66  |
| Ppp1r1b  | protein phosphatase 1, regulatory (inhibitor) subunit 1B                     | 4.73  |
| Ppp1r1b  | protein phosphatase 1, regulatory (inhibitor) subunit 1B                     | 2.07  |
| Ppp1r32  | protein phosphatase 1, regulatory subunit 32                                 | 1.92  |
| Ppp1r3c  | protein phosphatase 1, regulatory subunit 3C                                 | 3.95  |
| Ppp2r2c  | protein phosphatase 2, regulatory subunit B, gamma                           | 2.15  |
| Ppp2r3a  | protein phosphatase 2, regulatory subunit B", alpha                          | 2.25  |
| Pragmin  | pragma of Rnd2                                                               | 2.04  |
| Pramef12 | PRAME family member 12                                                       | 1.87  |
| Prap1    | proline-rich acidic protein 1                                                | 1.86  |
| Prdm1    | PR domain containing 1, with ZNF domain                                      | 4.04  |
| Preli2   | PRELI domain containing 2                                                    | 2.16  |
| Prima1   | proline rich membrane anchor 1                                               | 3.68  |
| Prkaa1   | protein kinase, AMP-activated, alpha 1 catalytic subunit                     | 1.89  |
| Prkaa2   | protein kinase, AMP-activated, alpha 2 catalytic subunit                     | 2.17  |

|           |                                                              |       |
|-----------|--------------------------------------------------------------|-------|
| Prkab2    | protein kinase, AMP-activated, beta 2 non-catalytic subunit  | 3.48  |
| Prkag2    | protein kinase, AMP-activated, gamma 2 non-catalytic subunit | 10.25 |
| Prkar1b   | protein kinase, cAMP dependent regulatory, type I, beta      | 2.53  |
| Prkch     | protein kinase C, eta                                        | 1.79  |
| Prl8a9    | prolactin family 8, subfamily a, member 9                    | 3.65  |
| Prnd      | prion protein 2 (dublet)                                     | 2.72  |
| Prodh     | proline dehydrogenase (oxidase) 1                            | 2.38  |
| Prom2     | prominin 2                                                   | 3.38  |
| Pros1     | protein S (alpha)                                            | 1.97  |
| Prph      | peripherin                                                   | 2.70  |
| Prss22    | protease, serine, 22                                         | 2.96  |
| Prss30    | protease, serine, 30                                         | 2.75  |
| Prss39    | protease, serine, 39                                         | 2.71  |
| Prss53    | protease, serine, 53                                         | 1.75  |
| Prtg      | protogenin                                                   | 2.31  |
| Psma8     | proteasome (prosome, macropain) subunit, alpha type, 8       | 2.43  |
| Psors1c2  | psoriasis susceptibility 1 candidate 2 (human)               | 1.83  |
| Pspc1     | paraspeckle component 1                                      | 1.81  |
| Ptgr1     | prostaglandin reductase 1                                    | 4.17  |
| Pthlh     | parathyroid hormone-like hormone                             | 5.51  |
| Ptk2b     | PTK2B protein tyrosine kinase 2 beta                         | 1.87  |
| Ptpdc1    | protein tyrosine phosphatase domain containing 1             | 1.97  |
| Ptpn18    | protein tyrosine phosphatase, non-receptor type 18           | 2.04  |
| Ptpn3     | protein tyrosine phosphatase, non-receptor type 3            | 1.80  |
| Ptpn3     | protein tyrosine phosphatase, non-receptor type 3            | 1.75  |
| Ptpn5     | protein tyrosine phosphatase, non-receptor type 5            | 5.06  |
| Ptprh     | protein tyrosine phosphatase, receptor type, H               | 3.07  |
| Ptprn     | protein tyrosine phosphatase, receptor type, N               | 3.26  |
| Ptprv     | protein tyrosine phosphatase, receptor type, V               | 2.01  |
| Pus10     | pseudouridylate synthase 10                                  | 3.81  |
| Pvalb     | parvalbumin                                                  | 11.10 |
| Pvrl4     | poliovirus receptor-related 4                                | 1.99  |
| Pycr1     | pyrroline-5-carboxylate reductase 1                          | 1.95  |
| Pygo1     | pygopus 1                                                    | 2.20  |
| Qrich2    | glutamine rich 2                                             | 2.05  |
| Qsox1     | quiescin Q6 sulfhydryl oxidase 1                             | 1.83  |
| R3hcc11   | R3H domain and coiled-coil containing 1-like                 | 2.58  |
| R3hdm2    | R3H domain containing 2                                      | 1.98  |
| Rab11fip1 | RAB11 family interacting protein 1 (class I)                 | 2.85  |
| Rab20     | RAB20, member RAS oncogene family                            | 2.09  |
| Rab30     | RAB30, member RAS oncogene family                            | 2.15  |
| Rab3a     | RAB3A, member RAS oncogene family                            | 3.10  |
| Rab3il1   | RAB3A interacting protein (rabin3)-like 1                    | 3.11  |
| Rab6b     | RAB6B, member RAS oncogene family                            | 1.98  |
| Rab7b     | Rab7b, member RAS oncogene family                            | 2.02  |



|          |                                                                                       |      |
|----------|---------------------------------------------------------------------------------------|------|
| Rab9b    | RAB9B, member RAS oncogene family                                                     | 2.53 |
| Rabggtb  | Rab geranylgeranyltransferase, beta subunit                                           | 2.37 |
| Rad51d   | RAD51 homolog D ( <i>S. cerevisiae</i> )                                              | 1.94 |
| Rad52    | RAD52 homolog ( <i>S. cerevisiae</i> )                                                | 2.29 |
| Radil    | Ras association and DIL domains                                                       | 2.80 |
| Raet1e   | retinoic acid early transcript 1E                                                     | 2.65 |
| Raet1l   | retinoic acid early transcript 1L                                                     | 3.18 |
| Ralgds   | ral guanine nucleotide dissociation stimulator                                        | 2.37 |
| Ramp3    | receptor (G protein-coupled) activity modifying protein 3                             | 2.87 |
| Ranbp3l  | RAN binding protein 3-like                                                            | 3.24 |
| Rap1gap  | Rap1 GTPase-activating protein                                                        | 2.19 |
| Rap1gap  | Rap1 GTPase-activating protein                                                        | 1.91 |
| Rap1gap2 | RAP1 GTPase activating protein 2                                                      | 2.53 |
| Rasa3    | RAS p21 protein activator 3                                                           | 1.81 |
| Rasa4    | RAS p21 protein activator 4                                                           | 2.16 |
| Rasa4    | RAS p21 protein activator 4                                                           | 2.20 |
| Rasa1l   | RAS protein activator like 1 (GAP1 like)                                              | 2.42 |
| Rasa13   | RAS protein activator like 3                                                          | 2.93 |
| Rasgrp2  | RAS guanyl releasing protein 2 (calcium and DAG-regulated)                            | 2.15 |
| Ras110a  | RAS-like, family 10, member A                                                         | 2.13 |
| Rassf5   | Ras association (RalGDS/AF-6) domain family member 5                                  | 4.39 |
| Rassf9   | Ras association (RalGDS/AF-6) domain family (N-terminal) member 9                     | 2.38 |
| Rbm20    | RNA binding motif protein 20                                                          | 2.86 |
| Rbm20    | RNA binding motif protein 20                                                          | 2.26 |
| Rbm38    | RNA binding motif protein 38                                                          | 1.95 |
| Rbpjl    | recombination signal binding protein for immunoglobulin kappa J region-like           | 5.92 |
| Rcbtb1   | regulator of chromosome condensation (RCC1) and BTB (POZ) domain containing protein 1 | 2.76 |
| Rcbtb1   | regulator of chromosome condensation (RCC1) and BTB (POZ) domain containing protein 1 | 2.38 |
| Rcor2    | REST corepressor 2                                                                    | 1.81 |
| Reep1    | receptor accessory protein 1                                                          | 1.92 |
| Rem2     | RAS (RAD and GEM) like GTP binding 2                                                  | 2.37 |
| Renbp    | renin binding protein                                                                 | 1.75 |
| Reps1    | RALBP1 associated Eps domain containing 1                                             | 2.09 |
| Rerg     | RAS-like, estrogen-regulated, growth-inhibitor                                        | 1.77 |
| Rftn1    | raftlin lipid raft linker 1                                                           | 2.16 |
| Rftn2    | raftlin family member 2                                                               | 4.21 |
| Rgl3     | ral guanine nucleotide dissociation stimulator-like 3                                 | 1.82 |
| Rgma     | RGM domain family, member A                                                           | 9.84 |
| Rgs17    | regulator of G-protein signaling 17                                                   | 2.21 |
| Rgs9     | regulator of G-protein signaling 9                                                    | 5.99 |
| Rheb1l   | Ras homolog enriched in brain like 1                                                  | 2.06 |
| Rhov     | ras homolog family member V                                                           | 3.85 |
| Rhox10   | reproductive homeobox 10                                                              | 1.89 |

|         |                                                                        |       |
|---------|------------------------------------------------------------------------|-------|
| Rhox2   | reproductive homeobox on X chromosome 2                                | 1.96  |
| Rhox4g  | reproductive homeobox 4G                                               | 6.35  |
| Rhox9   | reproductive homeobox 9                                                | 2.08  |
| Rhpn2   | rhophilin, Rho GTPase binding protein 2                                | 2.84  |
| Rhpn2   | rhophilin, Rho GTPase binding protein 2                                | 2.17  |
| Ribc2   | RIB43A domain with coiled-coils 2                                      | 3.11  |
| Rictor  | RPTOR independent companion of MTOR, complex 2                         | 2.01  |
| Riiad1  | regulatory subunit of type II PKA R-subunit (RIIa) domain containing 1 | 2.38  |
| Rimkla  | ribosomal modification protein rimK-like family member A               | 3.20  |
| Rnase1  | ribonuclease, RNase A family, 1 (pancreatic)                           | 4.93  |
| Rnase4  | ribonuclease, RNase A family 4                                         | 4.77  |
| Rnf112  | ring finger protein 112                                                | 2.23  |
| Rnf128  | ring finger protein 128, E3 ubiquitin protein ligase                   | 4.06  |
| Rnf14   | ring finger protein 14                                                 | 1.83  |
| Rnf144b | ring finger protein 144B                                               | 3.35  |
| Rnf208  | ring finger protein 208                                                | 3.83  |
| Rnf217  | ring finger protein 217                                                | 2.28  |
| Rnf32   | ring finger protein 32                                                 | 1.75  |
| Robo1   | roundabout homolog 1 (Drosophila)                                      | 2.75  |
| Robo3   | roundabout homolog 3 (Drosophila)                                      | 3.47  |
| Ror2    | receptor tyrosine kinase-like orphan receptor 2                        | 4.60  |
| Rpgr    | retinitis pigmentosa GTPase regulator                                  | 2.71  |
| Rph3al  | rabphilin 3A-like (without C2 domains)                                 | 3.18  |
| Rprd1a  | regulation of nuclear pre-mRNA domain containing 1A                    | 2.23  |
| Rprd1b  | regulation of nuclear pre-mRNA domain containing 1B                    | 1.92  |
| Rps4y2  | ribosomal protein S4, Y-linked 2                                       | 3.20  |
| RragB   | Ras-related GTP binding B                                              | 2.78  |
| Rragd   | Ras-related GTP binding D                                              | 4.35  |
| Rsad2   | radical S-adenosyl methionine domain containing 2                      | 14.76 |
| Rsph10b | radial spoke head 10 homolog B (Chlamydomonas)                         | 4.37  |
| Rsph6a  | radial spoke head 6 homolog A (Chlamydomonas)                          | 2.88  |
| RT1-Bb  | RT1 class II, locus Bb                                                 | 10.66 |
| RT1-Da  | RT1 class II, locus Da                                                 | 2.90  |
| RT1-Db1 | RT1 class II, locus Db1                                                | 12.26 |
| RT1-Db1 | RT1 class II, locus Db1                                                | 5.48  |
| RT1-DMa | RT1 class II, locus DMa                                                | 2.06  |
| RT1-DMb | RT1 class II, locus DMb                                                | 2.06  |
| Rtbdn   | retbindin                                                              | 1.97  |
| Rtn4r   | reticulon 4 receptor                                                   | 3.52  |
| Rxfp1   | relaxin/insulin-like family peptide receptor 1                         | 1.78  |
| Rybp    | RING1 and YY1 binding protein                                          | 2.13  |
| Rybp    | RING1 and YY1 binding protein                                          | 2.19  |
| S100a1  | S100 calcium binding protein A1                                        | 2.39  |
| S100a5  | S100 calcium binding protein A5                                        | 2.89  |
| S100a7a | S100 calcium binding protein A7A                                       | 1.86  |

|           |                                                                                                        |      |
|-----------|--------------------------------------------------------------------------------------------------------|------|
| S100a8    | S100 calcium binding protein A8                                                                        | 2.75 |
| S100g     | S100 calcium binding protein G                                                                         | 2.85 |
| S100pbp   | S100P binding protein                                                                                  | 2.11 |
| S1pr1     | sphingosine-1-phosphate receptor 1                                                                     | 6.49 |
| Sall2     | sal-like 2 ( <i>Drosophila</i> )                                                                       | 2.46 |
| Samd9l    | sterile alpha motif domain containing 9-like                                                           | 2.95 |
| Samd9l    | sterile alpha motif domain containing 9-like                                                           | 4.08 |
| Sarm1     | sterile alpha and TIR motif containing 1                                                               | 1.84 |
| Scaper    | S-phase cyclin A-associated protein in the ER                                                          | 2.12 |
| Scgb1c1   | secretoglobulin, family 1C, member 1                                                                   | 3.87 |
| Scn11a    | sodium channel, voltage-gated, type XI, alpha subunit                                                  | 2.51 |
| Scn1b     | sodium channel, voltage-gated, type I, beta                                                            | 2.35 |
| Scn4b     | sodium channel, voltage-gated, type IV, beta                                                           | 2.71 |
| Scn5a     | sodium channel, voltage-gated, type V, alpha subunit                                                   | 5.67 |
| Scn8a     | sodium channel, voltage gated, type VIII, alpha subunit                                                | 2.16 |
| Scpep1    | serine carboxypeptidase 1                                                                              | 1.91 |
| Scyl3     | SCY1-like 3 ( <i>S. cerevisiae</i> )                                                                   | 1.78 |
| Sdc2      | syndecan 2                                                                                             | 1.98 |
| Sdc3      | syndecan 3                                                                                             | 4.40 |
| Sdccag8   | serologically defined colon cancer antigen 8                                                           | 1.83 |
| Sds       | serine dehydratase                                                                                     | 4.48 |
| Sec16a    | SEC16 homolog A ( <i>S. cerevisiae</i> )                                                               | 4.12 |
| Sectm1b   | secreted and transmembrane 1B                                                                          | 2.10 |
| Selenbp1  | selenium binding protein 1                                                                             | 2.02 |
| Selp      | selectin P                                                                                             | 7.08 |
| Sema3b    | sema domain, immunoglobulin domain (Ig), short basic domain, secreted, (semaphorin) 3B                 | 1.76 |
| Sema6b    | sema domain, transmembrane domain (TM), and cytoplasmic domain, (semaphorin) 6B                        | 4.60 |
| Serf1     | small EDRK-rich factor 1                                                                               | 2.14 |
| Serf1     | small EDRK-rich factor 1                                                                               | 2.44 |
| Serinc2   | serine incorporator 2                                                                                  | 1.81 |
| Serpinb1a | serine (or cysteine) proteinase inhibitor, clade B, member 1a                                          | 5.38 |
| Serpinb1a | serine (or cysteine) proteinase inhibitor, clade B, member 1a                                          | 5.28 |
| Serpinb1b | serine (or cysteine) peptidase inhibitor, clade B, member 1b                                           | 1.92 |
| Serpinb3a | serine (or cysteine) peptidase inhibitor, clade B (ovalbumin), member 3A                               | 2.36 |
| Serpine1  | serpin peptidase inhibitor, clade E (nexin, plasminogen activator inhibitor type 1), member 1          | 4.00 |
| Serpine2  | serpin peptidase inhibitor, clade E (nexin, plasminogen activator inhibitor type 1), member 2          | 4.53 |
| Serpinf1  | serpin peptidase inhibitor, clade F (alpha-2 antiplasmin, pigment epithelium derived factor), member 1 | 1.75 |
| Sesn2     | sestrin 2                                                                                              | 3.14 |
| Sez6      | seizure related 6 homolog (mouse)                                                                      | 3.07 |
| Sez6l2    | seizure related 6 homolog (mouse)-like 2                                                               | 1.84 |
| Sfrp2     | secreted frizzled-related protein 2                                                                    | 1.81 |
| Sftpc     | surfactant protein C                                                                                   | 1.94 |

|          |                                                                                                         |      |
|----------|---------------------------------------------------------------------------------------------------------|------|
| Sftpd    | surfactant protein D                                                                                    | 2.13 |
| Sfxn2    | sideroflexin 2                                                                                          | 2.00 |
| Sgca     | sarcoglycan, alpha (dystrophin-associated glycoprotein)                                                 | 4.01 |
| Sgce     | sarcoglycan, epsilon                                                                                    | 1.80 |
| Sgk2     | serum/glucocorticoid regulated kinase 2                                                                 | 2.88 |
| Sgms2    | sphingomyelin synthase 2                                                                                | 3.19 |
| Sgpl1    | sphingosine-1-phosphate lyase 1                                                                         | 1.86 |
| Sh2b1    | SH2B adaptor protein 1                                                                                  | 1.96 |
| Sh2d3c   | SH2 domain containing 3C                                                                                | 2.30 |
| Sh3bgrl2 | SH3 domain binding glutamic acid-rich protein like 2                                                    | 2.91 |
| Sh3glb2  | SH3-domain GRB2-like endophilin B2                                                                      | 1.80 |
| Sh3kbp1  | SH3-domain kinase binding protein 1                                                                     | 1.87 |
| Sh3tc1   | SH3 domain and tetratricopeptide repeats 1                                                              | 1.81 |
| Sh3yl1   | SH3 domain containing, Ysc84-like 1 ( <i>S. cerevisiae</i> )                                            | 1.95 |
| Shc2     | SHC (Src homology 2 domain containing) transforming protein 2                                           | 3.17 |
| Shcbp1l  | SHC SH2-domain binding protein 1-like                                                                   | 2.17 |
| Shisa2   | shisa homolog 2 ( <i>Xenopus laevis</i> )                                                               | 3.23 |
| Shisa7   | shisa homolog 7 ( <i>Xenopus laevis</i> )                                                               | 2.95 |
| Shmt1    | serine hydroxymethyltransferase 1 (soluble)                                                             | 1.91 |
| Shox2    | short stature homeobox 2                                                                                | 2.27 |
| Siah2    | seven in absentia 2                                                                                     | 2.99 |
| Sigirr   | single immunoglobulin and toll-interleukin 1 receptor (TIR) domain                                      | 1.85 |
| Siglec10 | sialic acid binding Ig-like lectin 10                                                                   | 4.83 |
| Sipa1l2  | signal-induced proliferation-associated 1 like 2                                                        | 3.61 |
| Sirt2    | sirtuin 2                                                                                               | 1.89 |
| Sirt4    | sirtuin 4                                                                                               | 2.37 |
| Slc12a3  | solute carrier family 12 (sodium/chloride transporters), member 3                                       | 2.50 |
| Slc12a5  | solute carrier family 12 (potassium-chloride transporter), member 5                                     | 2.23 |
| Slc13a3  | solute carrier family 13 (sodium-dependent dicarboxylate transporter), member 3                         | 5.45 |
| Slc13a5  | solute carrier family 13 (sodium-dependent citrate transporter), member 5                               | 2.78 |
| Slc15a1  | solute carrier family 15 (oligopeptide transporter), member 1                                           | 3.84 |
| Slc16a11 | solute carrier family 16, member 11 (monocarboxylic acid transporter 11)                                | 2.07 |
| Slc16a14 | solute carrier family 16, member 14 (monocarboxylic acid transporter 14)                                | 1.93 |
| Slc16a6  | solute carrier family 16, member 6 (monocarboxylic acid transporter 7)                                  | 4.39 |
| Slc17a5  | solute carrier family 17 (anion/sugar transporter), member 5                                            | 2.94 |
| Slc17a6  | solute carrier family 17 (sodium-dependent inorganic phosphate cotransporter), member 6                 | 3.94 |
| Slc1a1   | solute carrier family 1 (neuronal/epithelial high affinity glutamate transporter, system Xag), member 1 | 2.68 |
| Slc22a3  | solute carrier family 22 (extraneuronal monoamine transporter), member 3                                | 2.22 |
| Slc25a19 | solute carrier family 25 (mitochondrial thiamine pyrophosphate carrier), member 19                      | 1.85 |
| Slc25a30 | solute carrier family 25, member 30                                                                     | 3.92 |
| Slc25a33 | solute carrier family 25 (pyrimidine nucleotide carrier), member 33                                     | 1.79 |
| Slc25a37 | solute carrier family 25 (mitochondrial iron transporter), member 37                                    | 3.18 |
| Slc25a40 | solute carrier family 25, member 40                                                                     | 2.74 |

|          |                                                                                                   |       |
|----------|---------------------------------------------------------------------------------------------------|-------|
| Slc25a47 | solute carrier family 25, member 47                                                               | 2.16  |
| Slc27a5  | solute carrier family 27 (fatty acid transporter), member 5                                       | 4.70  |
| Slc2a4   | solute carrier family 2 (facilitated glucose transporter), member 4                               | 2.00  |
| Slc2a5   | solute carrier family 2 (facilitated glucose/fructose transporter), member 5                      | 3.17  |
| Slc30a1  | solute carrier family 30 (zinc transporter), member 1                                             | 1.79  |
| Slc30a3  | solute carrier family 30 (zinc transporter), member 3                                             | 1.92  |
| Slc35f2  | solute carrier family 35, member F2                                                               | 2.07  |
| Slc35g1  | solute carrier family 35, member G1                                                               | 2.52  |
| Slc36a2  | solute carrier family 36 (proton/amino acid symporter), member 2                                  | 3.57  |
| Slc38a5  | solute carrier family 38, member 5                                                                | 5.00  |
| Slc38a7  | solute carrier family 38, member 7                                                                | 1.97  |
| Slc3a2   | solute carrier family 3 (activators of dibasic and neutral amino acid transport), member 2        | 2.22  |
| Slc40a1  | solute carrier family 40 (iron-regulated transporter), member 1                                   | 2.04  |
| Slc40a1  | solute carrier family 40 (iron-regulated transporter), member 1                                   | 2.76  |
| Slc44a2  | solute carrier family 44, member 2                                                                | 2.80  |
| Slc48a1  | solute carrier family 48 (heme transporter), member 1                                             | 1.98  |
| Slc4a11  | solute carrier family 4, sodium borate transporter, member 11                                     | 1.87  |
| Slc52a3  | solute carrier family 52, riboflavin transporter, member 3                                        | 3.26  |
| Slc6a2   | solute carrier family 6 (neurotransmitter transporter, noradrenalin), member 2                    | 1.96  |
| Slc6a8   | solute carrier family 6 (neurotransmitter transporter, creatine), member 8                        | 1.80  |
| Slc6a9   | solute carrier family 6 (neurotransmitter transporter, glycine), member 9                         | 1.77  |
| Slc7a1   | solute carrier family 7 (cationic amino acid transporter, y+ system), member 1                    | 2.21  |
| Slc7a11  | solute carrier family 7 (anionic amino acid transporter light chain, xc- system), member 11       | 14.57 |
| Slc7a3   | solute carrier family 7 (cationic amino acid transporter, y+ system), member 3                    | 5.69  |
| Slc7a8   | solute carrier family 7 (amino acid transporter light chain, L system), member 8                  | 3.85  |
| Slc9a2   | solute carrier family 9, subfamily A (NHE2, cation proton antiporter 2), member 2                 | 2.12  |
| Slc9a7   | solute carrier family 9 (sodium/hydrogen exchanger), member 7                                     | 1.99  |
| Slc9b2   | solute carrier family 9, subfamily B (NHA2, cation proton antiporter 2), member 2                 | 2.00  |
| Slco4a1  | solute carrier organic anion transporter family, member 4a1                                       | 2.33  |
| Slfn3    | schlafen 3                                                                                        | 3.10  |
| Slit1    | slit homolog 1 (Drosophila)                                                                       | 3.28  |
| Slit3    | slit homolog 3 (Drosophila)                                                                       | 2.21  |
| Slmo1    | slowmo homolog 1 (Drosophila)                                                                     | 3.08  |
| Slmo1    | slowmo homolog 1 (Drosophila)                                                                     | 2.07  |
| Smarca1  | SWI/SNF related, matrix associated, actin dependent regulator of chromatin, subfamily a, member 1 | 2.06  |
| Smarca2  | SWI/SNF related, matrix associated, actin dependent regulator of chromatin, subfamily a, member 2 | 2.41  |
| Smg5     | Smg-5 homolog, nonsense mediated mRNA decay factor (C. elegans)                                   | 1.77  |
| Smim5    | small integral membrane protein 5                                                                 | 2.01  |
| Smpd3    | sphingomyelin phosphodiesterase 3, neutral membrane                                               | 3.21  |
| Smtnl2   | smoothelin-like 2                                                                                 | 2.87  |
| Snai2    | snail homolog 2 (Drosophila)                                                                      | 2.30  |

|            |                                                                |       |
|------------|----------------------------------------------------------------|-------|
| Snhg11     | small nucleolar RNA host gene 11 (non-protein coding)          | 2.28  |
| Snph       | syntaphilin                                                    | 3.91  |
| Snrpn      | small nuclear ribonucleoprotein polypeptide N                  | 4.52  |
| Snurf      | SNRPN upstream reading frame                                   | 3.31  |
| Snx20      | sorting nexin 20                                               | 13.31 |
| Snx30      | sorting nexin family member 30                                 | 2.49  |
| Socs1      | suppressor of cytokine signaling 1                             | 2.95  |
| Sod3       | superoxide dismutase 3, extracellular                          | 1.78  |
| Sorbs2     | sorbin and SH3 domain containing 2                             | 3.17  |
| Sorbs2     | sorbin and SH3 domain containing 2                             | 2.22  |
| Sorcs2     | sortilin-related VPS10 domain containing receptor 2            | 4.88  |
| Sox11      | SRY (sex determining region Y)-box 11                          | 1.87  |
| Sox13      | SRY (sex determining region Y)-box 13                          | 2.18  |
| Sox18      | SRY (sex determining region Y)-box 18                          | 1.97  |
| Sox8       | SRY (sex determining region Y)-box 8                           | 12.80 |
| Sp100      | SP100 nuclear antigen                                          | 1.79  |
| Spag1      | sperm associated antigen 1                                     | 1.96  |
| Spata19    | spermatogenesis associated 19                                  | 2.54  |
| Spata31d1d | spermatogenesis associated 31 subfamily D, member 1D           | 2.66  |
| Spats1     | spermatogenesis associated, serine-rich 1                      | 7.21  |
| Spdef      | SAM pointed domain containing ets transcription factor         | 1.79  |
| Spdya      | speedy homolog A ( <i>Xenopus laevis</i> )                     | 2.57  |
| Speg       | SPEG complex locus                                             | 2.07  |
| Spetex-2A  | Spetex-2A protein                                              | 8.76  |
| Spetex-2F  | Spetex-2F protein                                              | 3.42  |
| Spetex-2G  | Spetex-2G protein                                              | 1.77  |
| Sphk1      | sphingosine kinase 1                                           | 1.91  |
| Spib       | Spi-B transcription factor (Spi-1/PU.1 related)                | 3.19  |
| Spink4     | serine peptidase inhibitor, Kazal type 4                       | 2.67  |
| Spink8     | serine peptidase inhibitor, Kazal type 8                       | 8.22  |
| Spint1     | serine peptidase inhibitor, Kunitz type 1                      | 1.88  |
| Spns2      | spinster homolog 2                                             | 4.42  |
| Spocd1-ps1 | SPOC domain containing 1, pseudogene 1                         | 3.23  |
| Spp1       | secreted phosphoprotein 1                                      | 2.60  |
| Spry3      | sprouty homolog 3 ( <i>Drosophila</i> )                        | 2.07  |
| Sptb       | spectrin, beta, erythrocytic                                   | 2.54  |
| Sqrdl      | sulfide quinone reductase-like (yeast)                         | 2.27  |
| Sqstm1     | sequestosome 1                                                 | 1.98  |
| Srgn       | serglycin                                                      | 4.28  |
| Srpx2      | sushi-repeat-containing protein, X-linked 2                    | 4.17  |
| Srxn1      | sulfiredoxin 1                                                 | 3.14  |
| Ss18l1     | synovial sarcoma translocation gene on chromosome 18-like 1    | 1.85  |
| Ssc5d      | scavenger receptor cysteine rich domain containing (5 domains) | 1.88  |
| Sspo       | SCO-spondin                                                    | 5.32  |
| Sstr3      | somatostatin receptor 3                                        | 2.98  |

|         |                                                                               |       |
|---------|-------------------------------------------------------------------------------|-------|
| Stag3   | stromal antigen 3                                                             | 2.30  |
| Stard13 | StAR-related lipid transfer (START) domain containing 13                      | 2.17  |
| Stard13 | StAR-related lipid transfer (START) domain containing 13                      | 3.20  |
| Stbd1   | starch binding domain 1                                                       | 2.55  |
| Stc2    | stanniocalcin 2                                                               | 6.11  |
| Steap3  | STEAP family member 3, metalloreductase                                       | 2.04  |
| Stim1   | stromal interaction molecule 1                                                | 2.06  |
| Stox1   | storkhead box 1                                                               | 2.25  |
| Stx16   | syntaxin 16                                                                   | 2.73  |
| Stx1a   | syntaxin 1A (brain)                                                           | 1.75  |
| Stx3    | syntaxin 3                                                                    | 1.85  |
| Stxbp1  | syntaxin binding protein 1                                                    | 2.28  |
| Stxbp5  | syntaxin binding protein 5 (tomosyn)                                          | 2.84  |
| Stxbp6  | syntaxin binding protein 6 (amisyn)                                           | 2.23  |
| Sulf2   | sulfatase 2                                                                   | 3.30  |
| Sult5a1 | sulfotransferase family 5A, member 1                                          | 2.67  |
| Sun2    | Sad1 and UNC84 domain containing 2                                            | 2.22  |
| Sun2    | Sad1 and UNC84 domain containing 2                                            | 2.19  |
| Susd4   | sushi domain containing 4                                                     | 2.47  |
| Susd4   | sushi domain containing 4                                                     | 2.75  |
| Svip    | small VCP/p97-interacting protein                                             | 3.28  |
| Syce3   | synaptonemal complex central element protein 3                                | 2.91  |
| Syn1    | synapsin I                                                                    | 2.55  |
| Syn2    | synapsin II                                                                   | 2.37  |
| Synm    | synemin, intermediate filament protein                                        | 2.83  |
| Synm    | synemin, intermediate filament protein                                        | 2.13  |
| Synpo2l | synaptopodin 2-like                                                           | 3.52  |
| Syt11   | synaptotagmin XI                                                              | 1.77  |
| Syt17   | synaptotagmin XVII                                                            | 2.00  |
| Syt3    | synaptotagmin III                                                             | 2.01  |
| Syt5    | synaptotagmin V                                                               | 2.35  |
| Syt7    | synaptotagmin VII                                                             | 3.05  |
| T2      | brachyury 2                                                                   | 3.48  |
| Tab1    | TGF-beta activated kinase 1/MAP3K7 binding protein 1                          | 1.91  |
| Tac2    | tachykinin 2                                                                  | 6.10  |
| Tacr2   | tachykinin receptor 2                                                         | 6.36  |
| Taf7l   | TAF7-like RNA polymerase II, TATA box binding protein (TBP)-associated factor | 22.07 |
| Tanc2   | tetratricopeptide repeat, ankyrin repeat and coiled-coil containing 2         | 4.39  |
| Tanc2   | tetratricopeptide repeat, ankyrin repeat and coiled-coil containing 2         | 2.81  |
| Tarsl2  | threonyl-tRNA synthetase-like 2                                               | 1.77  |
| Tbc1d2b | TBC1 domain family, member 2B                                                 | 1.83  |
| Tbc1d5  | TBC1 domain family, member 5                                                  | 1.89  |
| Tbc1d9  | TBC1 domain family, member 9 (with GRAM domain)                               | 1.89  |
| Tbc1d9  | TBC1 domain family, member 9 (with GRAM domain)                               | 1.91  |

|          |                                                 |       |
|----------|-------------------------------------------------|-------|
| Tbkbp1   | TBK1 binding protein 1                          | 2.43  |
| Tbx3     | T-box 3                                         | 2.75  |
| Tbxas1   | thromboxane A synthase 1, platelet              | 3.43  |
| Tcap     | titin-cap                                       | 2.03  |
| Tceal7   | transcription elongation factor A (SII)-like 7  | 2.20  |
| Tcf24    | transcription factor 24                         | 3.22  |
| Tcp11    | t-complex protein 11                            | 10.11 |
| Tcte1    | t-complex-associated testis expressed 1         | 2.42  |
| Tekt2    | tektin 2 (testicular)                           | 1.92  |
| Tekt4    | tektin 4                                        | 4.17  |
| Tex264   | testis expressed 264                            | 1.78  |
| Tfap4    | transcription factor AP-4                       | 2.16  |
| Tfcp2l1  | transcription factor CP2-like 1                 | 1.80  |
| Tff2     | trefoil factor 2                                | 8.21  |
| Tff3     | trefoil factor 3, intestinal                    | 8.77  |
| Tg       | thyroglobulin                                   | 2.64  |
| Tgfa     | transforming growth factor alpha                | 2.27  |
| Tgfbr2   | transforming growth factor, beta receptor II    | 2.08  |
| Theg     | testicular haploid expressed gene               | 7.21  |
| Themis2  | thymocyte selection associated family member 2  | 2.37  |
| Timm8a2  | translocase of inner mitochondrial membrane 8A2 | 2.32  |
| Tinagl1  | tubulointerstitial nephritis antigen-like 1     | 1.99  |
| Tiparp   | TCDD-inducible poly(ADP-ribose) polymerase      | 1.90  |
| Tlr4     | toll-like receptor 4                            | 3.86  |
| Tmcc2    | transmembrane and coiled-coil domain family 2   | 1.91  |
| Tmem108  | transmembrane protein 108                       | 2.14  |
| Tmem131  | transmembrane protein 131                       | 1.74  |
| Tmem145  | transmembrane protein 145                       | 4.37  |
| Tmem14a  | transmembrane protein 14A                       | 3.17  |
| Tmem150a | transmembrane protein 150A                      | 1.76  |
| Tmem170a | transmembrane protein 170A                      | 1.91  |
| Tmem184a | transmembrane protein 184A                      | 1.74  |
| Tmem2    | transmembrane protein 2                         | 2.07  |
| Tmem220  | transmembrane protein 220                       | 2.89  |
| Tmem229b | transmembrane protein 229B                      | 2.78  |
| Tmem229b | transmembrane protein 229B                      | 1.87  |
| Tmem231  | transmembrane protein 231                       | 2.14  |
| Tmem25   | transmembrane protein 25                        | 1.86  |
| Tmem38b  | transmembrane protein 38B                       | 3.27  |
| Tmem59l  | transmembrane protein 59-like                   | 3.63  |
| Tmem63c  | transmembrane protein 63c                       | 2.10  |
| Tmem74   | transmembrane protein 74                        | 10.31 |
| Tmem86a  | transmembrane protein 86A                       | 3.09  |
| Tmem86a  | transmembrane protein 86A                       | 2.56  |
| Tmem8a   | transmembrane protein 8A                        | 2.38  |



|          |                                                                    |      |
|----------|--------------------------------------------------------------------|------|
| Tmem8b   | transmembrane protein 8B                                           | 2.18 |
| Tmod1    | tropomodulin 1                                                     | 2.11 |
| Tmod4    | tropomodulin 4                                                     | 2.03 |
| Tmx4     | thioredoxin-related transmembrane protein 4                        | 2.19 |
| Tnfrsf17 | tumor necrosis factor receptor superfamily, member 17              | 2.29 |
| Tnfrsf21 | tumor necrosis factor receptor superfamily, member 21              | 1.78 |
| Tnfrsf9  | tumor necrosis factor receptor superfamily, member 9               | 3.17 |
| Tnfsf9   | tumor necrosis factor (ligand) superfamily, member 9               | 1.95 |
| Tnik     | TRAF2 and NCK interacting kinase                                   | 3.62 |
| Tnk2     | tyrosine kinase, non-receptor, 2                                   | 2.34 |
| Tnk2     | tyrosine kinase, non-receptor, 2                                   | 1.92 |
| Tnk2     | tyrosine kinase, non-receptor, 2                                   | 2.05 |
| Tnnt1    | troponin T type 1 (skeletal, slow)                                 | 4.16 |
| Tnnt1    | troponin T type 1 (skeletal, slow)                                 | 4.64 |
| Tns4     | tensin 4                                                           | 1.94 |
| Tollip   | toll interacting protein                                           | 1.81 |
| Tor1aip2 | torsin A interacting protein 2                                     | 1.77 |
| Tp53i11  | tumor protein p53 inducible protein 11                             | 1.80 |
| Tp53rk   | TP53 regulating kinase                                             | 1.82 |
| Tpd52l1  | tumor protein D52-like 1                                           | 2.76 |
| Tph1     | tryptophan hydroxylase 1                                           | 1.95 |
| Tpp1     | tripeptidyl peptidase I                                            | 2.20 |
| Traf3ip3 | TRAF3 interacting protein 3                                        | 2.26 |
| Traf6    | TNF receptor-associated factor 6, E3 ubiquitin protein ligase      | 2.10 |
| Trap1a   | tumor rejection antigen P1A                                        | 3.25 |
| Trem3    | triggering receptor expressed on myeloid cells 3                   | 5.37 |
| Trex2    | three prime repair exonuclease 2                                   | 2.14 |
| Trhr2    | thyrotropin releasing hormone receptor 2                           | 7.55 |
| Trib3    | tribbles homolog 3 (Drosophila)                                    | 4.80 |
| Trim29   | tripartite motif-containing 29                                     | 7.53 |
| Trim9    | tripartite motif-containing 9                                      | 2.14 |
| Triqk    | triple QxxK/R motif containing                                     | 4.74 |
| Trnp1    | TMF1-regulated nuclear protein 1                                   | 3.15 |
| Trove2   | TROVE domain family, member 2                                      | 2.16 |
| Trpv2    | transient receptor potential cation channel, subfamily V, member 2 | 3.62 |
| Tsga13   | testis specific, 13                                                | 2.72 |
| Tshz1    | teashirt zinc finger homeobox 1                                    | 2.89 |
| Tsks     | testis-specific serine kinase substrate                            | 2.19 |
| Tsnaxip1 | translin-associated factor X interacting protein 1                 | 1.95 |
| Tspan13  | tetraspanin 13                                                     | 1.75 |
| Tspan18  | tetraspanin 18                                                     | 1.80 |
| Tspan7   | tetraspanin 7                                                      | 2.67 |
| Tspan8   | tetraspanin 8                                                      | 1.87 |
| Tspan9   | tetraspanin 9                                                      | 1.78 |
| Ttc13    | tetratricopeptide repeat domain 13                                 | 1.96 |

|         |                                                                   |      |
|---------|-------------------------------------------------------------------|------|
| Ttc3    | tetratricopeptide repeat domain 3                                 | 1.99 |
| Ttc7    | tetratricopeptide repeat domain 7                                 | 1.76 |
| Ttc7b   | tetratricopeptide repeat domain 7B                                | 1.92 |
| Ttc8    | tetratricopeptide repeat domain 8                                 | 3.80 |
| Ttc9b   | tetratricopeptide repeat domain 9B                                | 2.30 |
| Ttl13   | tubulin tyrosine ligase-like family, member 13                    | 1.83 |
| Ttl3    | tubulin tyrosine ligase-like family, member 3                     | 2.85 |
| Ttl7    | tubulin tyrosine ligase-like family, member 7                     | 1.91 |
| Ttl7    | tubulin tyrosine ligase-like family, member 7                     | 2.41 |
| Tubb2a  | tubulin, beta 2A class IIa                                        | 1.79 |
| Tubb3   | tubulin, beta 3 class III                                         | 3.43 |
| Tulp1   | tubby like protein 1                                              | 2.15 |
| Txndc16 | thioredoxin domain containing 16                                  | 2.98 |
| Txnrd1  | thioredoxin reductase 1                                           | 1.86 |
| Txnrd3  | thioredoxin reductase 3                                           | 2.94 |
| Uap1    | UDP-N-acetylglucosamine pyrophosphorylase 1                       | 1.93 |
| Uap111  | UDP-N-acetylglucosamine pyrophosphorylase 1-like 1                | 2.83 |
| Ubald1  | UBA-like domain containing 1                                      | 1.79 |
| Ubap1   | ubiquitin-associated protein 1                                    | 1.90 |
| Ubd     | ubiquitin D                                                       | 5.71 |
| Ube2d1  | ubiquitin-conjugating enzyme E2D 1                                | 2.19 |
| Ubp1    | upstream binding protein 1 (LBP-1a)                               | 1.84 |
| Uchl1   | ubiquitin carboxyl-terminal esterase L1 (ubiquitin thiolesterase) | 5.58 |
| Ugt1a6  | UDP glucuronosyltransferase 1 family, polypeptide A6              | 2.49 |
| Ugt2b37 | UDP-glucuronosyltransferase 2 family, member 37                   | 2.47 |
| Unc45b  | unc-45 homolog B (C. elegans)                                     | 3.08 |
| Unc5c   | unc-5 homolog C (C. elegans)                                      | 1.94 |
| Unc5cl  | unc-5 homolog C (C. elegans)-like                                 | 7.62 |
| Uncx    | UNC homeobox                                                      | 2.48 |
| Upb1    | ureidopropionase, beta                                            | 2.36 |
| Upk2    | uroplakin 2                                                       | 6.57 |
| Upp1    | uridine phosphorylase 1                                           | 2.03 |
| Ush1c   | Usher syndrome 1C homolog (human)                                 | 2.03 |
| Usp18   | ubiquitin specific peptidase 18                                   | 6.92 |
| Usp18   | ubiquitin specific peptidase 18                                   | 5.75 |
| Usp2    | ubiquitin specific peptidase 2                                    | 1.79 |
| Usp31   | ubiquitin specific peptidase 31                                   | 1.82 |
| Usp43   | ubiquitin specific peptidase 43                                   | 3.18 |
| Usp44   | ubiquitin specific peptidase 44                                   | 2.09 |
| Usp46   | ubiquitin specific peptidase 46                                   | 2.43 |
| Usp49   | ubiquitin specific peptidase 49                                   | 1.79 |
| Ust     | uronyl-2-sulfotransferase                                         | 2.34 |
| Utrn    | utrophin                                                          | 1.74 |
| Utrn    | utrophin                                                          | 1.78 |
| Vamp1   | vesicle-associated membrane protein 1                             | 2.03 |

|         |                                                           |      |
|---------|-----------------------------------------------------------|------|
| Vamp4   | vesicle-associated membrane protein 4                     | 2.02 |
| Vat1    | vesicle amine transport protein 1 homolog (T californica) | 2.02 |
| Vegfa   | vascular endothelial growth factor A                      | 3.47 |
| Vegfa   | vascular endothelial growth factor A                      | 2.71 |
| Vegfa   | vascular endothelial growth factor A                      | 3.05 |
| Vegfa   | vascular endothelial growth factor A                      | 2.36 |
| Vegfc   | vascular endothelial growth factor C                      | 2.16 |
| Vegp2   | von Ebners gland protein 2                                | 2.19 |
| Vgf     | VGF nerve growth factor inducible                         | 3.98 |
| Vill    | villin-like                                               | 2.04 |
| Vmo1    | vitelline membrane outer layer 1 homolog (chicken)        | 2.93 |
| Vof16   | ischemia related factor vof-16                            | 2.44 |
| Vom1r30 | vomer nasal 1 receptor 30                                 | 1.99 |
| Vom2r46 | vomer nasal 2 receptor, 46                                | 2.20 |
| Vps37d  | vacuolar protein sorting 37 homolog D (S. cerevisiae)     | 2.12 |
| Vstm4   | V-set and transmembrane domain containing 4               | 3.69 |
| Vtcn1   | V-set domain containing T cell activation inhibitor 1     | 2.59 |
| Vwa1    | von Willebrand factor A domain containing 1               | 1.96 |
| Vwa7    | von Willebrand factor A domain containing 7               | 3.12 |
| Wars2   | tryptophanyl tRNA synthetase 2 (mitochondrial)            | 2.07 |
| Wars2   | tryptophanyl tRNA synthetase 2 (mitochondrial)            | 2.18 |
| Wdr86   | WD repeat domain 86                                       | 3.15 |
| Wfdc1   | WAP four-disulfide core domain 1                          | 4.37 |
| Wfdc10  | WAP four-disulfide core domain 10                         | 4.06 |
| Wfdc10  | WAP four-disulfide core domain 10                         | 5.64 |
| Wfdc11  | WAP four-disulfide core domain 11                         | 4.36 |
| Wfdc12  | WAP four-disulfide core domain 12                         | 3.59 |
| Wfdc15a | WAP four-disulfide core domain 15A                        | 3.31 |
| Wfdc18  | WAP four-disulfide core domain 18                         | 6.26 |
| Wfdc18  | WAP four-disulfide core domain 18                         | 9.06 |
| Wfdc3   | WAP four-disulfide core domain 3                          | 6.10 |
| Wif1    | Wnt inhibitory factor 1                                   | 4.34 |
| Wisp2   | WNT1 inducible signaling pathway protein 2                | 1.81 |
| Wnk2    | WNK lysine deficient protein kinase 2                     | 2.14 |
| Wnk4    | WNK lysine deficient protein kinase 4                     | 1.98 |
| Wnt11   | wingless-type MMTV integration site family, member 11     | 4.54 |
| Wnt11   | wingless-type MMTV integration site family, member 11     | 3.42 |
| Wnt3    | wingless-type MMTV integration site family, member 3      | 1.91 |
| Wnt4    | wingless-type MMTV integration site family, member 4      | 2.71 |
| Wnt7a   | wingless-type MMTV integration site family, member 7A     | 4.17 |
| Wnt7b   | wingless-type MMTV integration site family, member 7B     | 3.88 |
| Wwox    | WW domain-containing oxidoreductase                       | 3.40 |
| Xcl1    | chemokine (C motif) ligand 1                              | 1.85 |
| Xdh     | xanthine dehydrogenase                                    | 4.88 |
| Xpo5    | exportin 5                                                | 1.90 |

|         |                                                         |      |
|---------|---------------------------------------------------------|------|
| Xylb    | xylulokinase homolog ( <i>H. influenzae</i> )           | 3.22 |
| Ybx2    | Y box binding protein 2                                 | 2.21 |
| Zadh2   | zinc binding alcohol dehydrogenase, domain containing 2 | 3.01 |
| Zadh2   | zinc binding alcohol dehydrogenase, domain containing 2 | 3.24 |
| Zar11   | zygote arrest 1-like                                    | 2.65 |
| Zar11   | zygote arrest 1-like                                    | 3.45 |
| Zbtb10  | zinc finger and BTB domain containing 10                | 2.11 |
| Zbtb26  | zinc finger and BTB domain containing 26                | 2.07 |
| Zbtb34  | zinc finger and BTB domain containing 34                | 1.76 |
| Zbtb38  | zinc finger and BTB domain containing 38                | 3.11 |
| Zbtb39  | zinc finger and BTB domain containing 39                | 2.08 |
| Zbtb43  | zinc finger and BTB domain containing 43                | 2.31 |
| Zbtb46  | zinc finger and BTB domain containing 46                | 2.30 |
| Zbtb7b  | zinc finger and BTB domain containing 7B                | 2.30 |
| Zbtb7c  | zinc finger and BTB domain containing 7C                | 4.35 |
| Zbtb8b  | zinc finger and BTB domain containing 8b                | 3.70 |
| Zc3h8   | zinc finger CCCH type containing 8                      | 2.28 |
| Zcchc2  | zinc finger, CCHC domain containing 2                   | 2.11 |
| Zcchc2  | zinc finger, CCHC domain containing 2                   | 2.57 |
| Zdhhc2  | zinc finger, DHHC-type containing 2                     | 2.63 |
| Zeb1    | zinc finger E-box binding homeobox 1                    | 1.90 |
| Zeb2    | zinc finger E-box binding homeobox 2                    | 2.97 |
| Zfp12   | zinc finger protein 12                                  | 1.79 |
| Zfp133  | zinc finger protein 133                                 | 2.49 |
| Zfp141  | zinc finger protein 141                                 | 2.16 |
| Zfp169  | zinc finger protein 169                                 | 2.75 |
| Zfp187  | zinc finger protein 187                                 | 1.77 |
| Zfp2    | zinc finger protein 2                                   | 2.91 |
| Zfp219  | zinc finger protein 219                                 | 1.97 |
| Zfp275  | zinc finger protein 275                                 | 1.82 |
| Zfp280c | zinc finger protein 280C                                | 2.14 |
| Zfp295  | zinc finger protein 295                                 | 2.60 |
| Zfp296  | zinc finger protein 296                                 | 2.47 |
| Zfp394  | zinc finger protein 394                                 | 2.26 |
| Zfp40   | zinc finger protein 40                                  | 1.82 |
| Zfp418  | zinc finger protein 418                                 | 2.08 |
| Zfp438  | zinc finger protein 438                                 | 2.05 |
| Zfp496  | zinc finger protein 496                                 | 2.02 |
| Zfp496  | zinc finger protein 496                                 | 2.23 |
| Zfp503  | zinc finger protein 503                                 | 6.53 |
| Zfp53   | zinc finger protein 53                                  | 1.81 |
| Zfp536  | zinc finger protein 536                                 | 3.46 |
| Zfp579  | zinc finger protein 579                                 | 2.87 |
| Zfp597  | zinc finger protein 597                                 | 2.43 |
| Zfp692  | zinc finger protein 692                                 | 1.81 |

|         |                                                |      |
|---------|------------------------------------------------|------|
| Zfp777  | zinc finger protein 777                        | 1.98 |
| Zfp780b | zinc finger protein 780B                       | 1.83 |
| Zfp786  | zinc finger protein 786                        | 3.09 |
| Zfp799  | zinc finger protein 799                        | 1.86 |
| Zfp846  | zinc finger protein 846                        | 1.83 |
| Zfp870  | zinc finger protein 870                        | 1.78 |
| Zfp94   | zinc finger protein 94                         | 2.05 |
| Zfp956  | zinc finger protein 956                        | 3.15 |
| Zfr2    | zinc finger RNA binding protein 2              | 2.47 |
| Zfyve20 | zinc finger, FYVE domain containing 20         | 2.13 |
| Zfyve28 | zinc finger, FYVE domain containing 28         | 2.39 |
| Zhx2    | zinc fingers and homeoboxes 2                  | 2.29 |
| Zmat3   | zinc finger, matrin type 3                     | 2.39 |
| Zmynd10 | zinc finger, MYND-type containing 10           | 1.88 |
| Zp3     | zona pellucida glycoprotein 3 (sperm receptor) | 2.10 |
| Zscan20 | zinc finger and SCAN domain containing 20      | 2.42 |
| Zwilch  | zwilch kinetochore protein                     | 1.76 |

**Supplementary table 3: List of down-regulated genes upon 3-NPA treatment.** The Gene symbol, Gene name and fold change in expression (3-NPA/Control) are indicated.

| Gene Symbol | Gene Name                                                                                | Fold change |
|-------------|------------------------------------------------------------------------------------------|-------------|
| A3galt2     | alpha 1,3-galactosyltransferase 2                                                        | 0.35        |
| Abhd1       | abhydrolase domain containing 1                                                          | 0.55        |
| Abhd11      | abhydrolase domain containing 11                                                         | 0.53        |
| Acaa1a      | acetyl-Coenzyme A acyltransferase 1A                                                     | 0.56        |
| Acat1       | acetyl-CoA acetyltransferase 1                                                           | 0.50        |
| Acat3       | acetyl-Coenzyme A acetyltransferase 3                                                    | 0.52        |
| Acsl3       | acyl-CoA synthetase long-chain family member 3                                           | 0.46        |
| Acss2       | acyl-CoA synthetase short-chain family member 2                                          | 0.53        |
| Actl6a      | actin-like 6A                                                                            | 0.50        |
| Actr1a      | ARP1 actin-related protein 1 homolog A, centractin alpha (yeast)                         | 0.56        |
| Acy1        | aminoacylase 1                                                                           | 0.51        |
| Adamts1     | ADAM metalloproteinase with thrombospondin type 1 motif, 1                               | 0.12        |
| Adamts10    | ADAM metalloproteinase with thrombospondin type 1 motif, 10                              | 0.50        |
| Adm         | adrenomedullin                                                                           | 0.55        |
| Adra1d      | adrenoceptor alpha 1D                                                                    | 0.01        |
| Agrn        | agrin                                                                                    | 0.56        |
| Akr1a1      | aldo-keto reductase family 1, member A1 (aldehyde reductase)                             | 0.57        |
| Aldh16a1    | aldehyde dehydrogenase 16 family, member A1                                              | 0.56        |
| Aldoa       | aldolase A, fructose-bisphosphate                                                        | 0.51        |
| Aldoart1    | aldolase 1 A retrogene 1                                                                 | 0.48        |
| Aldoc       | aldolase C, fructose-bisphosphate                                                        | 0.49        |
| Alg8        | asparagine-linked glycosylation 8, alpha-1,3-glucosyltransferase homolog (S. cerevisiae) | 0.57        |
| Anapc10     | anaphase promoting complex subunit 10                                                    | 0.51        |
| Anapc15     | anaphase promoting complex subunit 15                                                    | 0.55        |
| Angptl4     | angiopoietin-like 4                                                                      | 0.55        |
| Ankrd1      | ankyrin repeat domain 1                                                                  | 0.53        |
| Anks4b      | ankyrin repeat and sterile alpha motif domain containing 4B                              | 0.35        |
| Ankzf1      | ankyrin repeat and zinc finger domain containing 1                                       | 0.51        |
| Anxa1       | annexin A1                                                                               | 0.56        |
| Apex1       | APEX nuclease (multifunctional DNA repair enzyme) 1                                      | 0.53        |
| Apoa2       | apolipoprotein A-II                                                                      | 0.39        |
| Arf4        | ADP-ribosylation factor 4                                                                | 0.50        |
| Arfrp1      | ADP-ribosylation factor related protein 1                                                | 0.41        |
| Arhgap28    | Rho GTPase activating protein 28                                                         | 0.50        |
| Arhgef4     | Rho guanine nucleotide exchange factor (GEF) 4                                           | 0.18        |
| Asb5        | ankyrin repeat and SOCS box-containing 5                                                 | 0.06        |
| Atg3        | autophagy related 3                                                                      | 0.45        |
| Atoh8       | atonal homolog 8 (Drosophila)                                                            | 0.48        |

|          |                                                                                             |      |
|----------|---------------------------------------------------------------------------------------------|------|
| Atp5g3   | ATP synthase, H <sup>+</sup> transporting, mitochondrial Fo complex, subunit C3 (subunit 9) | 0.51 |
| Atp5s    | ATP synthase, H <sup>+</sup> transporting, mitochondrial Fo complex, subunit s (factor B)   | 0.39 |
| Atp6v1e2 | ATPase, H transporting, lysosomal V1 subunit E2                                             | 0.44 |
| Avil     | advillin                                                                                    | 0.16 |
| Axl      | Axl receptor tyrosine kinase                                                                | 0.52 |
| B9d1     | B9 protein domain 1                                                                         | 0.49 |
| Bcl2l11  | BCL2-like 11 (apoptosis facilitator)                                                        | 0.51 |
| Bcl2l12  | BCL2-like 12 (proline rich)                                                                 | 0.46 |
| Bcl3     | B-cell CLL/lymphoma 3                                                                       | 0.51 |
| Bnip2    | BCL2/adenovirus E1B interacting protein 2                                                   | 0.46 |
| Btf3     | basic transcription factor 3                                                                | 0.53 |
| Btnl5    | butyrophilin-like 5                                                                         | 0.45 |
| Btnl7    | butyrophilin-like 7                                                                         | 0.27 |
| Bzw2     | basic leucine zipper and W2 domains 2                                                       | 0.56 |
| C4bpa    | complement component 4 binding protein, alpha                                               | 0.32 |
| C5       | complement component 5                                                                      | 0.15 |
| Cadm1    | cell adhesion molecule 1                                                                    | 0.56 |
| Calr     | calreticulin                                                                                | 0.55 |
| Cand2    | cullin-associated and neddylation-dissociated 2 (putative)                                  | 0.51 |
| Caprin1  | cell cycle associated protein 1                                                             | 0.49 |
| Carkd    | carbohydrate kinase domain containing                                                       | 0.56 |
| Casp9    | caspase 9, apoptosis-related cysteine peptidase                                             | 0.42 |
| Cav2     | caveolin 2                                                                                  | 0.04 |
| Cbs      | cystathionine beta synthase                                                                 | 0.17 |
| Ccdc80   | coiled-coil domain containing 80                                                            | 0.51 |
| Ccl2     | chemokine (C-C motif) ligand 2                                                              | 0.52 |
| Ccl20    | chemokine (C-C motif) ligand 20                                                             | 0.10 |
| Ccl20    | chemokine (C-C motif) ligand 20                                                             | 0.09 |
| Ccna2    | cyclin A2                                                                                   | 0.55 |
| Ccna2    | cyclin A2                                                                                   | 0.52 |
| Ccnb1    | cyclin B1                                                                                   | 0.52 |
| Ccnd3    | cyclin D3                                                                                   | 0.50 |
| Ccnl2    | cyclin L2                                                                                   | 0.30 |
| Cd82     | Cd82 molecule                                                                               | 0.51 |
| Cdc20    | cell division cycle 20 homolog ( <i>S. cerevisiae</i> )                                     | 0.49 |
| Cdc42    | cell division cycle 42 (GTP binding protein)                                                | 0.47 |
| Cdc42se2 | CDC42 small effector 2                                                                      | 0.54 |
| Cdh6     | cadherin 6                                                                                  | 0.56 |
| Cdk2ap1  | cyclin-dependent kinase 2 associated protein 1                                              | 0.55 |
| Cdk5     | cyclin-dependent kinase 5                                                                   | 0.56 |
| Cdkl3    | cyclin-dependent kinase-like 3                                                              | 0.43 |
| Cdkn2c   | cyclin-dependent kinase inhibitor 2C (p18, inhibits CDK4)                                   | 0.31 |
| Cenpa    | centromere protein A                                                                        | 0.55 |
| Cetn2    | centrin, EF-hand protein, 2                                                                 | 0.36 |
| Cetn3    | centrin, EF-hand protein, 3                                                                 | 0.50 |

|          |                                                                                    |      |
|----------|------------------------------------------------------------------------------------|------|
| Cfb      | complement factor B                                                                | 0.50 |
| Cfl2     | cofilin 2, muscle                                                                  | 0.48 |
| Cfl2     | cofilin 2, muscle                                                                  | 0.45 |
| Chid1    | chitinase domain containing 1                                                      | 0.39 |
| Chtf18   | CTF18, chromosome transmission fidelity factor 18 homolog ( <i>S. cerevisiae</i> ) | 0.44 |
| Cinp     | cyclin-dependent kinase 2-interacting protein                                      | 0.52 |
| Cish     | cytokine inducible SH2-containing protein                                          | 0.45 |
| Cited1   | Cbp/p300-interacting transactivator with Glu/Asp-rich carboxy-terminal domain 1    | 0.24 |
| Clec2d11 | C-type lectin domain family 2 member D-like 1                                      | 0.42 |
| Cmtm6    | CKLF-like MARVEL transmembrane domain containing 6                                 | 0.41 |
| Cnih2    | cornichon homolog 2 ( <i>Drosophila</i> )                                          | 0.52 |
| Col3a1   | collagen, type III, alpha 1                                                        | 0.29 |
| Col4a5   | collagen, type IV, alpha 5                                                         | 0.48 |
| Colec10  | collectin sub-family member 10 (C-type lectin)                                     | 0.01 |
| Colec12  | collectin sub-family member 12                                                     | 0.54 |
| Comm5    | COMM domain containing 5                                                           | 0.56 |
| Cope     | coatamer protein complex, subunit epsilon                                          | 0.52 |
| Copz1    | coatamer protein complex, subunit zeta 1                                           | 0.57 |
| Coq4     | coenzyme Q4 homolog ( <i>S. cerevisiae</i> )                                       | 0.46 |
| Coq7     | coenzyme Q7 homolog, ubiquinone (yeast)                                            | 0.56 |
| Cp       | ceruloplasmin (ferroxidase)                                                        | 0.43 |
| Cpsf6    | cleavage and polyadenylation specific factor 6, 68kDa                              | 0.55 |
| Csmd3    | CUB and Sushi multiple domains 3                                                   | 0.28 |
| Ctnn1    | catenin (cadherin associated protein), alpha-like 1                                | 0.34 |
| Cwf19l2  | CWF19-like 2, cell cycle control ( <i>S. pombe</i> )                               | 0.57 |
| Cxcl12   | chemokine (C-X-C motif) ligand 12                                                  | 0.26 |
| Cxcl12   | chemokine (C-X-C motif) ligand 12                                                  | 0.35 |
| Cxcl2    | chemokine (C-X-C motif) ligand 2                                                   | 0.53 |
| Cxcl3    | chemokine (C-X-C motif) ligand 3                                                   | 0.53 |
| Cxcr7    | chemokine (C-X-C motif) receptor 7                                                 | 0.24 |
| Cyb561d2 | cytochrome b-561 domain containing 2                                               | 0.50 |
| D2hgdh   | D-2-hydroxyglutarate dehydrogenase                                                 | 0.48 |
| Dad1     | Defender against cell death 1                                                      | 0.56 |
| Dapk3    | death-associated protein kinase 3                                                  | 0.54 |
| Dck      | deoxycytidine kinase                                                               | 0.45 |
| Ddx49    | DEAD (Asp-Glu-Ala-Asp) box polypeptide 49                                          | 0.43 |
| Ddx56    | DEAD (Asp-Glu-Ala-Asp) box helicase 56                                             | 0.49 |
| Derl3    | derlin 3                                                                           | 0.33 |
| Dfna5    | deafness, autosomal dominant 5 (human)                                             | 0.50 |
| Dfnb59   | deafness, autosomal recessive 59                                                   | 0.26 |
| Dhcr7    | 7-dehydrocholesterol reductase                                                     | 0.57 |
| Dhfr     | dihydrofolate reductase                                                            | 0.44 |
| Dhps     | deoxyhypusine synthase                                                             | 0.55 |
| Dhrs3    | dehydrogenase/reductase (SDR family) member 3                                      | 0.17 |
| Dhrs4    | dehydrogenase/reductase (SDR family) member 4                                      | 0.51 |



|         |                                                                           |      |
|---------|---------------------------------------------------------------------------|------|
| Dlx1    | distal-less homeobox 1                                                    | 0.55 |
| Dnajc14 | DnaJ (Hsp40) homolog, subfamily C, member 14                              | 0.50 |
| Dnajc5  | DnaJ (Hsp40) homolog, subfamily C, member 5                               | 0.53 |
| Dnal1   | dynein, axonemal, light chain 1                                           | 0.47 |
| Dner    | delta/notch-like EGF repeat containing                                    | 0.53 |
| Dnm11   | dynamamin 1-like                                                          | 0.53 |
| Dok4    | docking protein 4                                                         | 0.54 |
| Dpep1   | dipeptidase 1 (renal)                                                     | 0.35 |
| Dscc1   | defective in sister chromatid cohesion 1 homolog ( <i>S. cerevisiae</i> ) | 0.54 |
| Dse     | dermatan sulfate epimerase                                                | 0.53 |
| Dusp1   | dual specificity phosphatase 1                                            | 0.44 |
| Dut     | deoxyuridine triphosphatase                                               | 0.57 |
| Dvl3    | dishevelled, dsh homolog 3 ( <i>Drosophila</i> )                          | 0.57 |
| Dynll1  | dynein light chain LC8-type 1                                             | 0.53 |
| Efcab11 | EF-hand calcium binding domain 11                                         | 0.49 |
| Efs     | embryonal Fyn-associated substrate                                        | 0.54 |
| Eif3e   | eukaryotic translation initiation factor 3, subunit E                     | 0.55 |
| Eif3g   | eukaryotic translation initiation factor 3, subunit G                     | 0.48 |
| Elov16  | ELOVL fatty acid elongase 6                                               | 0.37 |
| Elov16  | ELOVL fatty acid elongase 6                                               | 0.26 |
| Elp6    | elongator acetyltransferase complex subunit 6                             | 0.56 |
| Emg1    | EMG1 nucleolar protein homolog ( <i>S. cerevisiae</i> )                   | 0.39 |
| Emg1    | EMG1 nucleolar protein homolog ( <i>S. cerevisiae</i> )                   | 0.45 |
| Emp3    | epithelial membrane protein 3                                             | 0.53 |
| Eno1    | enolase 1, (alpha)                                                        | 0.50 |
| Epha4   | Eph receptor A4                                                           | 0.48 |
| Epha4   | Eph receptor A4                                                           | 0.48 |
| Etfa    | electron-transfer-flavoprotein, alpha polypeptide                         | 0.47 |
| Exoc4   | exocyst complex component 4                                               | 0.55 |
| Exoc5   | exocyst complex component 5                                               | 0.55 |
| Exoc7   | exocyst complex component 7                                               | 0.55 |
| Fa2h    | fatty acid 2-hydroxylase                                                  | 0.39 |
| Fads1   | fatty acid desaturase 1                                                   | 0.37 |
| Fads2   | fatty acid desaturase 2                                                   | 0.25 |
| Fam173a | family with sequence similarity 173, member A                             | 0.49 |
| Fam18b2 | family with sequence similarity 18, member B2                             | 0.53 |
| Fam203a | family with sequence similarity 203, member A                             | 0.47 |
| Fam213a | family with sequence similarity 213, member A                             | 0.38 |
| Fam64a  | family with sequence similarity 64, member A                              | 0.45 |
| Fam83e  | family with sequence similarity 83, member E                              | 0.38 |
| Faslg   | Fas ligand (TNF superfamily, member 6)                                    | 0.34 |
| Fasn    | fatty acid synthase                                                       | 0.54 |
| Fat2    | FAT tumor suppressor homolog 2 ( <i>Drosophila</i> )                      | 0.03 |
| Fat4    | FAT tumor suppressor homolog 4 ( <i>Drosophila</i> )                      | 0.32 |
| Fbxo3   | F-box protein 3                                                           | 0.49 |

|           |                                                                                            |      |
|-----------|--------------------------------------------------------------------------------------------|------|
| Fbxw9     | F-box and WD repeat domain containing 9                                                    | 0.49 |
| Fdps      | farnesyl diphosphate synthase                                                              | 0.21 |
| Fdps      | farnesyl diphosphate synthase                                                              | 0.25 |
| Fert2     | fer (fms/fps related) protein kinase, testis specific 2                                    | 0.46 |
| Filip11   | filamin A interacting protein 1-like                                                       | 0.28 |
| Fopnl     | FGFR1OP N-terminal like                                                                    | 0.57 |
| Fos       | FBJ osteosarcoma oncogene                                                                  | 0.45 |
| Foxc1     | forkhead box C1                                                                            | 0.41 |
| Foxq1     | forkhead box Q1                                                                            | 0.33 |
| Fscn2     | fascin homolog 2, actin-bundling protein, retinal ( <i>Strongylocentrotus purpuratus</i> ) | 0.44 |
| Fstl1     | follistatin-like 1                                                                         | 0.44 |
| Fut2      | fucosyltransferase 2 (secretor status included)                                            | 0.02 |
| Fzd2      | frizzled family receptor 2                                                                 | 0.46 |
| Gabrb3    | gamma-aminobutyric acid (GABA) A receptor, beta 3                                          | 0.02 |
| Gadd45g   | growth arrest and DNA-damage-inducible, gamma                                              | 0.41 |
| Gale      | UDP-galactose-4-epimerase                                                                  | 0.38 |
| Gapdh-ps1 | glyceraldehyde-3-phosphate dehydrogenase, pseudogene 1                                     | 0.55 |
| Ggct      | gamma-glutamyl cyclotransferase                                                            | 0.47 |
| Gja1      | gap junction protein, alpha 1                                                              | 0.54 |
| Glb11     | galactosidase, beta 1-like                                                                 | 0.39 |
| Glipr2    | GLI pathogenesis-related 2                                                                 | 0.44 |
| Glipr2    | GLI pathogenesis-related 2                                                                 | 0.48 |
| Glod4     | glyoxalase domain containing 4                                                             | 0.55 |
| Gmcl1     | germ cell-less, spermatogenesis associated 1                                               | 0.47 |
| Gmfb      | glia maturation factor, beta                                                               | 0.37 |
| Gmppb     | GDP-mannose pyrophosphorylase B                                                            | 0.34 |
| Gmpr2     | guanosine monophosphate reductase 2                                                        | 0.48 |
| Gngl2     | guanine nucleotide binding protein (G protein), gamma 12                                   | 0.47 |
| Gpn1      | GPN-loop GTPase 1                                                                          | 0.55 |
| Gpn1      | GPN-loop GTPase 1                                                                          | 0.57 |
| Gpx7      | glutathione peroxidase 7                                                                   | 0.43 |
| Gramd1b   | GRAM domain containing 1B                                                                  | 0.48 |
| Grik3     | glutamate receptor, ionotropic, kainate 3                                                  | 0.01 |
| Grwd1     | glutamate-rich WD repeat containing 1                                                      | 0.57 |
| Gspt2     | G1 to S phase transition 2                                                                 | 0.02 |
| Gtse1     | G-2 and S-phase expressed 1                                                                | 0.41 |
| H2afz     | H2A histone family, member Z                                                               | 0.48 |
| H3f3b     | H3 histone, family 3B                                                                      | 0.55 |
| Haus1     | HAUS augmin-like complex, subunit 1                                                        | 0.48 |
| Hccs      | holocytochrome c synthase                                                                  | 0.47 |
| Hcfc1     | host cell factor C1                                                                        | 0.53 |
| Hdac6     | histone deacetylase 6                                                                      | 0.53 |
| Hdgf      | hepatoma-derived growth factor                                                             | 0.56 |
| Heatr2    | HEAT repeat containing 2                                                                   | 0.37 |
| Hif1a     | hypoxia-inducible factor 1, alpha subunit (basic helix-loop-helix transcription factor)    | 0.51 |

|            |                                                               |      |
|------------|---------------------------------------------------------------|------|
| Hint2      | histidine triad nucleotide binding protein 2                  | 0.57 |
| Hist1h1a   | histone cluster 1, H1a                                        | 0.18 |
| Hist1h2ai  | histone cluster 1, H2ai                                       | 0.43 |
| Hist1h2ail | histone cluster 1, H2ai-like                                  | 0.50 |
| Hist1h2an  | histone cluster 1, H2an                                       | 0.16 |
| Hist1h2an  | histone cluster 1, H2an                                       | 0.39 |
| Hist1h2bc  | histone cluster 1, H2bc                                       | 0.26 |
| Hist1h2bc  | histone cluster 1, H2bc                                       | 0.30 |
| Hist1h2bd  | histone cluster 1, H2bd                                       | 0.30 |
| Hist1h2bf  | histone cluster 1, H2bf                                       | 0.13 |
| Hist1h2bh  | histone cluster 1, H2bh                                       | 0.15 |
| Hist1h2bh  | histone cluster 1, H2bh                                       | 0.13 |
| Hist1h2bl  | histone cluster 1, H2bl                                       | 0.32 |
| Hist1h4b   | histone cluster 1, H4b                                        | 0.51 |
| Hist1h4m   | histone cluster 1, H4m                                        | 0.52 |
| Hist1h4m   | histone cluster 1, H4m                                        | 0.49 |
| Hist2h3c2  | histone cluster 2, H3c2                                       | 0.48 |
| Hist2h4    | histone cluster 2, H4                                         | 0.55 |
| Hist3h2a   | histone cluster 3, H2a                                        | 0.33 |
| Hist3h2ba  | histone cluster 3, H2ba                                       | 0.42 |
| Hist3h2bb  | histone cluster 3, H2bb                                       | 0.35 |
| Hm13       | histocompatibility 13                                         | 0.48 |
| Hmbox1     | homeobox containing 1                                         | 0.04 |
| Hmg111     | high-mobility group (nonhistone chromosomal) protein 1-like 1 | 0.43 |
| Hmgcr      | 3-hydroxy-3-methylglutaryl-CoA reductase                      | 0.51 |
| Hmgcs1     | 3-hydroxy-3-methylglutaryl-CoA synthase 1 (soluble)           | 0.44 |
| Hnrnpa2b1  | heterogeneous nuclear ribonucleoprotein A2/B1                 | 0.56 |
| Hnrnpa3    | heterogeneous nuclear ribonucleoprotein A3                    | 0.57 |
| Hnrnpm     | heterogeneous nuclear ribonucleoprotein M                     | 0.53 |
| Hnrpd      | heterogeneous nuclear ribonucleoprotein D                     | 0.55 |
| Hnrph1     | heterogeneous nuclear ribonucleoprotein H1                    | 0.43 |
| Hnrph1     | heterogeneous nuclear ribonucleoprotein H1                    | 0.53 |
| Hpx        | hemopexin                                                     | 0.38 |
| Hras       | Harvey rat sarcoma virus oncogene                             | 0.52 |
| Hsd17b12   | hydroxysteroid (17-beta) dehydrogenase 12                     | 0.39 |
| Hsd17b7    | hydroxysteroid (17-beta) dehydrogenase 7                      | 0.44 |
| Hspa5      | heat shock protein 5                                          | 0.57 |
| Hspa8      | heat shock 70kDa protein 8                                    | 0.44 |
| Hspa8      | heat shock 70kDa protein 8                                    | 0.47 |
| Hspbp1     | HSPA binding protein, cytoplasmic cochaperone 1               | 0.56 |
| Hypk       | Huntingtin interacting protein K                              | 0.57 |
| Id1        | inhibitor of DNA binding 1                                    | 0.29 |
| Id2        | inhibitor of DNA binding 2                                    | 0.18 |
| Id3        | inhibitor of DNA binding 3                                    | 0.22 |
| Idi1       | isopentenyl-diphosphate delta isomerase 1                     | 0.48 |

|          |                                                                           |      |
|----------|---------------------------------------------------------------------------|------|
| Ier3     | immediate early response 3                                                | 0.51 |
| Ier5l    | immediate early response 5-like                                           | 0.51 |
| Ifi35    | interferon-induced protein 35                                             | 0.33 |
| Ift122   | intraflagellar transport 122 homolog (Chlamydomonas)                      | 0.56 |
| Igtp     | interferon gamma induced GTPase                                           | 0.55 |
| Ikbip    | IKBKB interacting protein                                                 | 0.42 |
| Imp3     | IMP3, U3 small nucleolar ribonucleoprotein, homolog (yeast)               | 0.54 |
| Insig1   | insulin induced gene 1                                                    | 0.20 |
| Ints2    | integrator complex subunit 2                                              | 0.51 |
| Irf2     | interferon regulatory factor 2                                            | 0.06 |
| Itfg2    | integrin alpha FG-GAP repeat containing 2                                 | 0.45 |
| Itgb6    | integrin, beta 6                                                          | 0.54 |
| Ivd      | isovaleryl-CoA dehydrogenase                                              | 0.56 |
| Junb     | jun B proto-oncogene                                                      | 0.37 |
| Kalrn    | kalirin, RhoGEF kinase                                                    | 0.56 |
| Kcnk12   | potassium channel, subfamily K, member 12                                 | 0.35 |
| Kdelr2   | KDEL (Lys-Asp-Glu-Leu) endoplasmic reticulum protein retention receptor 2 | 0.47 |
| Khyn-ps1 | KH and NYN domain containing, pseudogene 1                                | 0.55 |
| Klc3     | kinesin light chain 3                                                     | 0.50 |
| Klhl13   | kelch-like 13 (Drosophila)                                                | 0.49 |
| Kng1     | kininogen 1                                                               | 0.17 |
| Kng1l1   | kininogen 1-like 1                                                        | 0.17 |
| Kpna5    | karyopherin alpha 5 (importin alpha 6)                                    | 0.51 |
| Kptn     | kaptin (actin binding protein)                                            | 0.55 |
| L3hypdh  | L-3-hydroxyproline dehydratase (trans-)                                   | 0.55 |
| Laptm4a  | lysosomal protein transmembrane 4 alpha                                   | 0.55 |
| Lbp      | lipopolysaccharide binding protein                                        | 0.26 |
| Ldha     | lactate dehydrogenase A                                                   | 0.54 |
| Ldlr     | low density lipoprotein receptor                                          | 0.38 |
| Lipe     | lipase, hormone sensitive                                                 | 0.36 |
| Lmod2    | leiomodrin 2 (cardiac)                                                    | 0.38 |
| Lox      | lysyl oxidase                                                             | 0.32 |
| Lpar6    | lysophosphatidic acid receptor 6                                          | 0.39 |
| Lrp2     | low density lipoprotein receptor-related protein 2                        | 0.41 |
| Lrrc48   | leucine rich repeat containing 48                                         | 0.44 |
| Lsm4     | LSM4 homolog, U6 small nuclear RNA associated (S. cerevisiae)             | 0.48 |
| Lym2     | LYR motif containing 2                                                    | 0.53 |
| Mad2l2   | MAD2 mitotic arrest deficient-like 2 (yeast)                              | 0.43 |
| Magt1    | magnesium transporter 1                                                   | 0.40 |
| Map4k3   | mitogen-activated protein kinase kinase kinase kinase 3                   | 0.47 |
| Map7d2   | MAP7 domain containing 2                                                  | 0.14 |
| Mat2a    | methionine adenosyltransferase II, alpha                                  | 0.56 |
| Mbd3     | methyl-CpG binding domain protein 3                                       | 0.52 |
| Mdh1     | malate dehydrogenase 1, NAD (soluble)                                     | 0.54 |
| Med29    | mediator complex subunit 29                                               | 0.45 |

|         |                                                                                     |      |
|---------|-------------------------------------------------------------------------------------|------|
| Mef2c   | myocyte enhancer factor 2C                                                          | 0.10 |
| Mfap2   | microfibrillar-associated protein 2                                                 | 0.03 |
| Mkks    | McKusick-Kaufman syndrome                                                           | 0.38 |
| Mlec    | malectin                                                                            | 0.49 |
| Mmadhc  | methylmalonic aciduria (cobalamin deficiency) cblD type, with homocystinuria        | 0.50 |
| Mmp14   | matrix metalloproteinase 14 (membrane-inserted)                                     | 0.11 |
| Mnd1    | meiotic nuclear divisions 1 homolog ( <i>S. cerevisiae</i> )                        | 0.51 |
| Mon2    | MON2 homolog ( <i>S. cerevisiae</i> )                                               | 0.50 |
| Morf4l1 | mortality factor 4 like 1                                                           | 0.41 |
| Mpp6    | membrane protein, palmitoylated 6 (MAGUK p55 subfamily member 6)                    | 0.55 |
| Mpst    | mercaptopyruvate sulfurtransferase                                                  | 0.56 |
| Mrpl35  | mitochondrial ribosomal protein L35                                                 | 0.52 |
| Mrpl49  | mitochondrial ribosomal protein L49                                                 | 0.44 |
| Mrps10  | mitochondrial ribosomal protein S10                                                 | 0.11 |
| Msmo1   | methylsterol monooxygenase 1                                                        | 0.37 |
| Mst1    | Macrophage stimulating 1 (hepatocyte growth factor-like)                            | 0.41 |
| Msx2    | msh homeobox 2                                                                      | 0.49 |
| Msx2    | msh homeobox 2                                                                      | 0.46 |
| Mvd     | mevalonate (diphospho) decarboxylase                                                | 0.53 |
| Mvk     | mevalonate kinase                                                                   | 0.50 |
| Mvp     | major vault protein                                                                 | 0.45 |
| Mxra8   | matrix-remodelling associated 8                                                     | 0.56 |
| Myl12a  | myosin, light chain 12A, regulatory, non-sarcomeric                                 | 0.57 |
| Myl12a  | myosin, light chain 12A, regulatory, non-sarcomeric                                 | 0.52 |
| Myl12b  | myosin, light chain 12B, regulatory                                                 | 0.44 |
| Myl4    | myosin, light chain 4                                                               | 0.24 |
| Mylpf   | myosin light chain, phosphorylatable, fast skeletal muscle                          | 0.52 |
| N6amt1  | N-6 adenine-specific DNA methyltransferase 1 (putative)                             | 0.44 |
| Ncaph2  | non-SMC condensin II complex, subunit H2                                            | 0.33 |
| Nfkb1   | nuclear factor of kappa light polypeptide gene enhancer in B-cells 1                | 0.55 |
| Nfkbia  | nuclear factor of kappa light polypeptide gene enhancer in B-cells inhibitor, alpha | 0.51 |
| Nhp2    | NHP2 ribonucleoprotein                                                              | 0.54 |
| Nim1    | serine/threonine-protein kinase NIM1                                                | 0.09 |
| Nipa2   | non imprinted in Prader-Willi/Angelman syndrome 2                                   | 0.56 |
| Nme7    | NME/NM23 family member 7                                                            | 0.48 |
| Nmnat1  | nicotinamide nucleotide adenylyltransferase 1                                       | 0.55 |
| Npepo   | aminopeptidase O                                                                    | 0.51 |
| Npm3    | nucleophosmin/nucleoplasmin, 3                                                      | 0.50 |
| Nr4a3   | nuclear receptor subfamily 4, group A, member 3                                     | 0.33 |
| Nrep    | neuronal regeneration related protein                                               | 0.44 |
| Nrep    | neuronal regeneration related protein                                               | 0.39 |
| Nsdhl   | NAD(P) dependent steroid dehydrogenase-like                                         | 0.46 |
| Ntn4    | netrin 4                                                                            | 0.31 |
| Nudcd2  | NudC domain containing 2                                                            | 0.46 |
| Nudcd2  | NudC domain containing 2                                                            | 0.42 |

|          |                                                                                                     |      |
|----------|-----------------------------------------------------------------------------------------------------|------|
| Nudt14   | nudix (nucleoside diphosphate linked moiety X)-type motif 14                                        | 0.47 |
| Oaz2     | ornithine decarboxylase antizyme 2                                                                  | 0.57 |
| Obsl1    | obscurin-like 1                                                                                     | 0.37 |
| Odf1     | outer dense fiber of sperm tails 1                                                                  | 0.02 |
| Ogdh     | oxoglutarate (alpha-ketoglutarate) dehydrogenase (lipoamide)                                        | 0.56 |
| Oip5     | Opa interacting protein 5                                                                           | 0.31 |
| Olr540   | olfactory receptor 540                                                                              | 0.02 |
| Olr691   | olfactory receptor 691                                                                              | 0.02 |
| Olr834   | olfactory receptor 834                                                                              | 0.05 |
| Oscp1    | organic solute carrier partner 1                                                                    | 0.54 |
| Pabpn11  | poly(A)binding protein nuclear 1-like                                                               | 0.03 |
| Pafah1b2 | platelet-activating factor acetylhydrolase 1b, catalytic subunit 2                                  | 0.57 |
| Paip2b   | poly(A) binding protein interacting protein 2B                                                      | 0.57 |
| Parn     | poly(A)-specific ribonuclease                                                                       | 0.42 |
| Parva    | parvin, alpha                                                                                       | 0.55 |
| Pbk      | PDZ binding kinase                                                                                  | 0.55 |
| Pbx1     | pre-B-cell leukemia homeobox 1                                                                      | 0.48 |
| Pcbd1    | pterin-4 alpha-carbinolamine dehydratase/dimerization cofactor of hepatocyte nuclear factor 1 alpha | 0.44 |
| Pcbd1    | pterin-4 alpha-carbinolamine dehydratase/dimerization cofactor of hepatocyte nuclear factor 1 alpha | 0.50 |
| Pcca     | propionyl-coenzyme A carboxylase, alpha polypeptide                                                 | 0.42 |
| Pcsk9    | proprotein convertase subtilisin/kexin type 9                                                       | 0.23 |
| Pdgfc    | platelet derived growth factor C                                                                    | 0.07 |
| Pdhb     | pyruvate dehydrogenase (lipoamide) beta                                                             | 0.47 |
| Pdk1     | pyruvate dehydrogenase kinase, isozyme 1                                                            | 0.55 |
| Pdzk1ip1 | PDZK1 interacting protein 1                                                                         | 0.50 |
| Peg12    | paternally expressed 12                                                                             | 0.34 |
| Pex11g   | peroxisomal biogenesis factor 11 gamma                                                              | 0.43 |
| Pgk1     | phosphoglycerate kinase 1                                                                           | 0.57 |
| Pgp      | phosphoglycolate phosphatase                                                                        | 0.47 |
| Phf19    | PHD finger protein 19                                                                               | 0.56 |
| Pias1    | protein inhibitor of activated STAT, 1                                                              | 0.32 |
| Pibf1    | progesterone immunomodulatory binding factor 1                                                      | 0.57 |
| Pigw     | phosphatidylinositol glycan anchor biosynthesis, class W                                            | 0.44 |
| Pigz     | phosphatidylinositol glycan anchor biosynthesis, class Z                                            | 0.55 |
| Pih1d1   | PIH1 domain containing 1                                                                            | 0.46 |
| Pih1d2   | PIH1 domain containing 2                                                                            | 0.56 |
| Pitpna   | phosphatidylinositol transfer protein, alpha                                                        | 0.53 |
| Pkd2     | polycystic kidney disease 2 (autosomal dominant)                                                    | 0.40 |
| Pkdcc    | protein kinase domain containing, cytoplasmic                                                       | 0.48 |
| Plag1    | pleiomorphic adenoma gene 1                                                                         | 0.55 |
| Plgrkt   | plasminogen receptor, C-terminal lysine transmembrane protein                                       | 0.57 |
| Plscr1   | phospholipid scramblase 1                                                                           | 0.41 |
| Pmpca    | peptidase (mitochondrial processing) alpha                                                          | 0.54 |

|          |                                                                                          |      |
|----------|------------------------------------------------------------------------------------------|------|
| Pnrc1    | proline-rich nuclear receptor coactivator 1                                              | 0.47 |
| Pnrc2    | proline-rich nuclear receptor coactivator 2                                              | 0.50 |
| Pof1b    | premature ovarian failure 1B                                                             | 0.22 |
| Pofut1   | protein O-fucosyltransferase 1                                                           | 0.45 |
| Pole3    | polymerase (DNA directed), epsilon 3, accessory subunit                                  | 0.45 |
| Polr3f   | polymerase (RNA) III (DNA directed) polypeptide F                                        | 0.54 |
| Polr3h   | polymerase (RNA) III (DNA directed) polypeptide H                                        | 0.48 |
| Pop5     | processing of precursor 5, ribonuclease P/MRP subunit ( <i>S. cerevisiae</i> )           | 0.49 |
| Ppic     | peptidylprolyl isomerase C                                                               | 0.49 |
| Ppih     | peptidylprolyl isomerase H (cyclophilin H)                                               | 0.56 |
| Ppp1r10  | protein phosphatase 1, regulatory subunit 10                                             | 0.55 |
| Ppp1r16a | protein phosphatase 1, regulatory subunit 16A                                            | 0.47 |
| Ppp1r17  | protein phosphatase 1, regulatory subunit 17                                             | 0.01 |
| Prdm2    | PR domain containing 2, with ZNF domain                                                  | 0.54 |
| Prpf31   | PRP31 pre-mRNA processing factor 31 homolog ( <i>S. cerevisiae</i> )                     | 0.51 |
| Prr11    | proline rich 11                                                                          | 0.50 |
| Prrx1    | paired related homeobox 1                                                                | 0.56 |
| Prrx1    | paired related homeobox 1                                                                | 0.51 |
| Prtfdc1  | phosphoribosyl transferase domain containing 1                                           | 0.56 |
| Psm2     | proteasome (prosome, macropain) subunit, alpha type 2                                    | 0.51 |
| Psm1     | proteasome (prosome, macropain) subunit, beta type 1                                     | 0.50 |
| Psm10    | proteasome (prosome, macropain) subunit, beta type 10                                    | 0.33 |
| Psm6     | proteasome (prosome, macropain) subunit, beta type 6                                     | 0.57 |
| Psm8     | proteasome (prosome, macropain) subunit, beta type 8 (large multifunctional peptidase 7) | 0.39 |
| Psm13    | proteasome (prosome, macropain) 26S subunit, non-ATPase, 13                              | 0.55 |
| Psm14    | proteasome (prosome, macropain) 26S subunit, non-ATPase, 14                              | 0.40 |
| Psm9     | proteasome (prosome, macropain) 26S subunit, non-ATPase, 9                               | 0.55 |
| Psm9     | proteasome (prosome, macropain) 26S subunit, non-ATPase, 9                               | 0.51 |
| Psm2     | proteasome (prosome, macropain) activator subunit 2                                      | 0.55 |
| Ptgis    | prostaglandin I2 (prostacyclin) synthase                                                 | 0.40 |
| Ptprd    | protein tyrosine phosphatase, receptor type, D                                           | 0.54 |
| Ptrhd1   | peptidyl-tRNA hydrolase domain containing 1                                              | 0.57 |
| Pycr1    | pyrroline-5-carboxylate reductase-like                                                   | 0.57 |
| Rab25    | RAB25, member RAS oncogene family                                                        | 0.03 |
| Rab2a    | RAB2A, member RAS oncogene family                                                        | 0.57 |
| Rab32    | RAB32, member RAS oncogene family                                                        | 0.38 |
| Rab15    | RAB, member RAS oncogene family-like 5                                                   | 0.40 |
| Ranbp1   | RAN binding protein 1                                                                    | 0.36 |
| Rap1b    | RAP1B, member of RAS oncogene family                                                     | 0.46 |
| Raph1    | Ras association (RalGDS/AF-6) and pleckstrin homology domains 1                          | 0.50 |
| Ras11a   | RAS-like family 11 member A                                                              | 0.26 |
| Ras12    | RAS-like, family 12                                                                      | 0.50 |
| Ras12-9  | RAS-like, family 2, locus 9                                                              | 0.52 |
| Rbmx     | RNA binding motif protein, X-linked                                                      | 0.47 |

|          |                                                                                                                  |      |
|----------|------------------------------------------------------------------------------------------------------------------|------|
| Rbx1     | ring-box 1, E3 ubiquitin protein ligase                                                                          | 0.54 |
| Rcc2     | regulator of chromosome condensation 2                                                                           | 0.51 |
| Rgs16    | regulator of G-protein signaling 16                                                                              | 0.40 |
| Rmdn2    | regulator of microtubule dynamics 2                                                                              | 0.44 |
| Rnf113a1 | ring finger protein 113A1                                                                                        | 0.52 |
| Rnpep    | arginyl aminopeptidase (aminopeptidase B)                                                                        | 0.56 |
| Ropn11   | rhophilin associated tail protein 1-like                                                                         | 0.50 |
| Rpa3     | replication protein A3                                                                                           | 0.42 |
| Rpf2     | ribosome production factor 2 homolog ( <i>S. cerevisiae</i> )                                                    | 0.56 |
| Rps23    | ribosomal protein S23                                                                                            | 0.57 |
| Rrad     | Ras-related associated with diabetes                                                                             | 0.47 |
| Rrm2     | ribonucleotide reductase M2                                                                                      | 0.39 |
| Rtp4     | receptor (chemosensory) transporter protein 4                                                                    | 0.57 |
| Rwdd4    | RWD domain containing 4A                                                                                         | 0.44 |
| Scd      | stearoyl-CoA desaturase (delta-9-desaturase)                                                                     | 0.30 |
| Scd      | stearoyl-CoA desaturase (delta-9-desaturase)                                                                     | 0.38 |
| Scd4     | stearoyl-coenzyme A desaturase 4                                                                                 | 0.26 |
| Scfd2    | sec1 family domain containing 2                                                                                  | 0.32 |
| Scnm1    | sodium channel modifier 1                                                                                        | 0.57 |
| Scnn1g   | sodium channel, nonvoltage-gated 1, gamma                                                                        | 0.03 |
| Scrn1    | secernin 1                                                                                                       | 0.50 |
| Scrn2    | secernin 2                                                                                                       | 0.44 |
| Sec13    | SEC13 homolog ( <i>S. cerevisiae</i> )                                                                           | 0.52 |
| Sec61a1  | Sec61 alpha 1 subunit ( <i>S. cerevisiae</i> )                                                                   | 0.37 |
| Selo     | selenoprotein O                                                                                                  | 0.54 |
| Selt     | selenoprotein T                                                                                                  | 0.35 |
| Sema3c   | sema domain, immunoglobulin domain (Ig), short basic domain, secreted, (semaphorin) 3C                           | 0.57 |
| Sema4a   | sema domain, immunoglobulin domain (Ig), transmembrane domain (TM) and short cytoplasmic domain, (semaphorin) 4A | 0.50 |
| Senp7    | SUMO1/sentrin specific peptidase 7                                                                               | 0.57 |
| Sephs1   | selenophosphate synthetase 1                                                                                     | 0.52 |
| Sfr1     | SWI5-dependent recombination repair 1                                                                            | 0.47 |
| Shbg     | sex hormone binding globulin                                                                                     | 0.28 |
| Shc3     | SHC (Src homology 2 domain containing) transforming protein 3                                                    | 0.21 |
| Shisa3   | shisa homolog 3 ( <i>Xenopus laevis</i> )                                                                        | 0.23 |
| Siglec1  | sialic acid binding Ig-like lectin 1, sialoadhesin                                                               | 0.11 |
| Skiv2l   | superkiller viralicidic activity 2-like ( <i>S. cerevisiae</i> )                                                 | 0.51 |
| Slc10a1  | solute carrier family 10 (sodium/bile acid cotransporter family), member 1                                       | 0.02 |
| Slc10a7  | solute carrier family 10 (sodium/bile acid cotransporter family), member 7                                       | 0.45 |
| Slc11a2  | solute carrier family 11 (proton-coupled divalent metal ion transporters), member 2                              | 0.51 |
| Slc11a2  | solute carrier family 11 (proton-coupled divalent metal ion transporters), member 2                              | 0.42 |
| Slc16a13 | solute carrier family 16, member 13 (monocarboxylic acid transporter 13)                                         | 0.56 |
| Slc16a3  | solute carrier family 16, member 3 (monocarboxylic acid transporter 4)                                           | 0.49 |
| Slc24a3  | solute carrier family 24 (sodium/potassium/calcium exchanger), member 3                                          | 0.35 |



|          |                                                                                            |      |
|----------|--------------------------------------------------------------------------------------------|------|
| Slc25a20 | solute carrier family 25 (carnitine/acylcarnitine translocase), member 20                  | 0.56 |
| Slc26a4  | solute carrier family 26, member 4                                                         | 0.53 |
| Slc29a3  | solute carrier family 29 (nucleoside transporters), member 3                               | 0.38 |
| Slc35a2  | solute carrier family 35 (UDP-galactose transporter), member A2                            | 0.52 |
| Slc37a4  | solute carrier family 37 (glucose-6-phosphate transporter), member 4                       | 0.51 |
| Slc38a4  | solute carrier family 38, member 4                                                         | 0.30 |
| Slc39a7  | solute carrier family 39 (zinc transporter), member 7                                      | 0.48 |
| Slc51b   | solute carrier family 51, beta subunit                                                     | 0.50 |
| Slc52a2  | solute carrier family 52, riboflavin transporter, member 2                                 | 0.45 |
| Smim1    | small integral membrane protein 1                                                          | 0.54 |
| Snapap   | SNAP-associated protein                                                                    | 0.55 |
| Snrpc    | small nuclear ribonucleoprotein polypeptide C                                              | 0.49 |
| Snx11    | sorting nexin 11                                                                           | 0.55 |
| Socs3    | suppressor of cytokine signaling 3                                                         | 0.48 |
| Sod2     | superoxide dismutase 2, mitochondrial                                                      | 0.50 |
| Sostdc1  | sclerostin domain containing 1                                                             | 0.05 |
| Spa17    | sperm autoantigenic protein 17                                                             | 0.46 |
| Sparc    | secreted protein, acidic, cysteine-rich (osteonectin)                                      | 0.43 |
| Spata24  | spermatogenesis associated 24                                                              | 0.48 |
| Spcs3    | signal peptidase complex subunit 3 homolog ( <i>S. cerevisiae</i> )                        | 0.53 |
| Sqle     | squalene epoxidase                                                                         | 0.42 |
| Srebf1   | sterol regulatory element binding transcription factor 1                                   | 0.52 |
| Srebf2   | sterol regulatory element binding transcription factor 2                                   | 0.55 |
| Srsf1    | serine/arginine-rich splicing factor 1                                                     | 0.39 |
| Srsf1    | serine/arginine-rich splicing factor 1                                                     | 0.39 |
| Srsf10   | serine/arginine-rich splicing factor 10                                                    | 0.45 |
| Srsf2    | serine/arginine-rich splicing factor 2                                                     | 0.46 |
| Srsf3    | serine/arginine-rich splicing factor 3                                                     | 0.44 |
| Srsf7    | serine/arginine-rich splicing factor 7                                                     | 0.57 |
| Ssr1     | signal sequence receptor, alpha                                                            | 0.54 |
| Stard4   | StAR-related lipid transfer (START) domain containing 4                                    | 0.33 |
| Stt3b    | STT3, subunit of the oligosaccharyltransferase complex, homolog B ( <i>S. cerevisiae</i> ) | 0.55 |
| Sub1     | SUB1 homolog ( <i>S. cerevisiae</i> )                                                      | 0.48 |
| Sucla2   | succinate-CoA ligase, ADP-forming, beta subunit                                            | 0.46 |
| Syne4    | spectrin repeat containing, nuclear envelope family member 4                               | 0.21 |
| Taf10    | TAF10 RNA polymerase II, TATA box binding protein (TBP)-associated factor                  | 0.40 |
| Taf9b    | TAF9B RNA polymerase II, TATA box binding protein (TBP)-associated factor                  | 0.51 |
| Tagln    | transgelin                                                                                 | 0.53 |
| Tax1bp3  | Tax1 (human T-cell leukemia virus type I) binding protein 3                                | 0.48 |
| Tbc1d7   | TBC1 domain family, member 7                                                               | 0.49 |
| Tceanc   | transcription elongation factor A (SII) N-terminal and central domain containing           | 0.55 |
| Tcf25    | transcription factor 25 (basic helix-loop-helix)                                           | 0.50 |
| Tead1    | TEA domain family member 1                                                                 | 0.57 |
| Tecpr1   | tectonin beta-propeller repeat containing 1                                                | 0.33 |
| Ten1     | TEN1 telomerase capping complex subunit                                                    | 0.36 |

|          |                                                                                                  |      |
|----------|--------------------------------------------------------------------------------------------------|------|
| Tex19.1  | testis expressed 19.1                                                                            | 0.37 |
| Tex26    | testis expressed 26                                                                              | 0.39 |
| Tgm1     | transglutaminase 1 (K polypeptide epidermal type I, protein-glutamine-gamma-glutamyltransferase) | 0.50 |
| Tgm6     | transglutaminase 6                                                                               | 0.44 |
| Thap7    | THAP domain containing 7                                                                         | 0.53 |
| Tia1     | TIA1 cytotoxic granule-associated RNA binding protein                                            | 0.43 |
| Timm8b   | translocase of inner mitochondrial membrane 8 homolog b (yeast)                                  | 0.55 |
| Tk1      | thymidine kinase 1, soluble                                                                      | 0.48 |
| Tle1     | transducin-like enhancer of split 1 (E(sp1) homolog, Drosophila)                                 | 0.47 |
| Tlr2     | toll-like receptor 2                                                                             | 0.38 |
| Tm9sf4   | transmembrane 9 superfamily protein member 4                                                     | 0.54 |
| Tmem128  | transmembrane protein 128                                                                        | 0.57 |
| Tmem18   | transmembrane protein 18                                                                         | 0.54 |
| Tmem183a | transmembrane protein 183A                                                                       | 0.54 |
| Tmem208  | transmembrane protein 208                                                                        | 0.49 |
| Tmem223  | transmembrane protein 223                                                                        | 0.45 |
| Tmem223  | transmembrane protein 223                                                                        | 0.45 |
| Tmem30a  | transmembrane protein 30A                                                                        | 0.56 |
| Tmem97   | transmembrane protein 97                                                                         | 0.49 |
| Tnnc1    | troponin C type 1 (slow)                                                                         | 0.25 |
| Tp53inp2 | tumor protein p53 inducible nuclear protein 2                                                    | 0.34 |
| Tpi1     | triosephosphate isomerase 1                                                                      | 0.53 |
| Tpi1     | triosephosphate isomerase 1                                                                      | 0.54 |
| Tpm1     | tropomyosin 1, alpha                                                                             | 0.47 |
| Tprkb    | Tp53rk binding protein                                                                           | 0.52 |
| Tra2b    | transformer 2 beta homolog (Drosophila)                                                          | 0.37 |
| Trim47   | tripartite motif-containing 47                                                                   | 0.57 |
| Trps1    | trichorhinophalangeal syndrome I                                                                 | 0.55 |
| Trpt1    | tRNA phosphotransferase 1                                                                        | 0.56 |
| Tsta3    | tissue specific transplantation antigen P35B                                                     | 0.38 |
| Ttc22    | tetratricopeptide repeat domain 22                                                               | 0.34 |
| Tuba1a   | tubulin, alpha 1A                                                                                | 0.33 |
| Tuba1b   | tubulin, alpha 1B                                                                                | 0.50 |
| Tuba1c   | tubulin, alpha 1C                                                                                | 0.44 |
| Tuba1c   | tubulin, alpha 1C                                                                                | 0.44 |
| Tuba3a   | tubulin, alpha 3A                                                                                | 0.53 |
| Tubgcp4  | tubulin, gamma complex associated protein 4                                                      | 0.57 |
| Tyms     | thymidylate synthetase                                                                           | 0.53 |
| Ube2i    | ubiquitin-conjugating enzyme E2I                                                                 | 0.57 |
| Ube2k    | ubiquitin-conjugating enzyme E2K                                                                 | 0.52 |
| Ube2l6   | ubiquitin-conjugating enzyme E2L 6                                                               | 0.40 |
| Ube2v1   | ubiquitin-conjugating enzyme E2 variant 1                                                        | 0.57 |
| Ubl4a    | ubiquitin-like 4A                                                                                | 0.44 |
| Ubox5    | U-box domain containing 5                                                                        | 0.49 |

|         |                                                                                          |      |
|---------|------------------------------------------------------------------------------------------|------|
| Ufd11   | ubiquitin fusion degradation 1 like (yeast)                                              | 0.44 |
| Ufm1    | ubiquitin-fold modifier 1                                                                | 0.52 |
| Ulk2    | Unc-51 like kinase 2 ( <i>C. elegans</i> )                                               | 0.42 |
| Unc50   | unc-50 homolog ( <i>C. elegans</i> )                                                     | 0.51 |
| Use1    | unconventional SNARE in the ER 1 homolog ( <i>S. cerevisiae</i> )                        | 0.51 |
| Usp4    | ubiquitin specific peptidase 4 (proto-oncogene)                                          | 0.56 |
| Usp9x   | ubiquitin specific peptidase 9, X-linked                                                 | 0.52 |
| Uxs1    | UDP-glucuronate decarboxylase 1                                                          | 0.49 |
| Vars    | valyl-tRNA synthetase                                                                    | 0.54 |
| Vav3    | vav 3 guanine nucleotide exchange factor                                                 | 0.47 |
| Vcp     | valosin-containing protein                                                               | 0.57 |
| Vimp    | VCP-interacting membrane protein                                                         | 0.38 |
| Vps45   | vacuolar protein sorting 45 homolog ( <i>S. cerevisiae</i> )                             | 0.52 |
| Wbscr22 | Williams Beuren syndrome chromosome region 22                                            | 0.51 |
| Wdr18   | WD repeat domain 18                                                                      | 0.37 |
| Wdr35l  | WD repeat domain 35-like                                                                 | 0.49 |
| Wdr78   | WD repeat domain 78                                                                      | 0.40 |
| Wls     | wntless homolog ( <i>Drosophila</i> )                                                    | 0.52 |
| Wnt2    | wingless-type MMTV integration site family member 2                                      | 0.32 |
| Ybey    | ybeY metallopeptidase                                                                    | 0.45 |
| Yif1a   | Yip1 interacting factor homolog A ( <i>S. cerevisiae</i> )                               | 0.45 |
| Yif1b   | Yip1 interacting factor homolog B ( <i>S. cerevisiae</i> )                               | 0.56 |
| Yipf4   | Yip1 domain family, member 4                                                             | 0.56 |
| Yme111  | YME1-like 1 ( <i>S. cerevisiae</i> )                                                     | 0.43 |
| Ywhaz   | tyrosine 3-monooxygenase/tryptophan 5-monooxygenase activation protein, zeta polypeptide | 0.49 |
| Zbtb1   | zinc finger and BTB domain containing 1                                                  | 0.46 |
| Zbtb6   | zinc finger and BTB domain containing 6                                                  | 0.57 |
| Zdhhc20 | zinc finger, DHHC-type containing 20                                                     | 0.45 |
| Zfp207  | zinc finger protein 207                                                                  | 0.50 |
| Zfp7    | zinc finger protein 7                                                                    | 0.30 |
| Zic2    | Zic family member 2                                                                      | 0.31 |
| Zic5    | Zic family member 5                                                                      | 0.42 |
| Zmat2   | zinc finger, matrin type 2                                                               | 0.29 |

## Legend to Figures

**Supplementary figure 1: Characterization of Mn/ MPP<sup>+</sup> and 3-NPA neurotoxicity in N27 cells.** N27 cells were exposed to increasing concentrations of 3-NPA (0-8 mM) for 24 h (A) and 48 h (B) and its toxicity was assessed by measuring the cell viability by MTT dye reduction assay. Cell viability assay revealed a dose and time dependent increase in cell death upon 3-NPA treatment. Similarly, N27 cells treated with Mn (C) and MPP<sup>+</sup> (D) also showed concentration-dependent increase in cell death at 48 h. LD<sub>50</sub> concentration of 3-NPA/ Mn/ MPP<sup>+</sup> was found to be 4 mM, 150 μM and 250 μM respectively (n= 6 trials per experiment; \*p< 0.05, \*\*p < 0.01, \*\*\*p< 0.001, \*\*\*\*p< 0.0001). Assessment of gross morphology of N27 cells treated with 2 mM and 4 mM 3-NPA for 48h. N27 cells were cultured on PLL coated coverslips and treated with 3-NPA at LD<sub>50</sub> and subjected to H & E staining. Representative images of control and 3-NPA treated N27 cells taken at 20X magnification (E) showed prominent changes including loss of cellular processes accompanied by nuclear condensation along with flattening of cells in comparison with their respective control (n= 3 coverslips per group). The insets correspond to magnified images from a field of the same plate but different from the one shown in the 20X image.

**Supplementary figure 2. Mitochondrial dysfunction in 3-NPA treated N27 cells.** 3-NPA induced reduction in mitochondrial CII activity (100 % activity= 15μg/μL/min) (A) as measured by reduction in absorbance of DCIP at 600nm, along with increased ADP/ ATP (B) and NAD/ NADH (D) at LD<sub>50</sub>. Dose dependent decrease in mitochondrial membrane potential as demonstrated by JC1 assay also indicated compromised mitochondrial and cellular energy status upon 3-NPA treatment in N27 cells (C) (n= 6 trials per experiment; \*p< 0.05, \*\*p < 0.01, \*\*\*p< 0.001).

**Supplementary figure 3. Ultrastructural evidences of mitochondrial dysfunction in the 3-NPA cell model.** In comparison to untreated N27 cells that showed normal mitochondrial morphology (A-i), 3-NPA treated cells showed morphological hallmarks of mitochondrial dysfunction at both 2 mM (B-i) and 4 mM concentrations (C-i, ii). Mitochondrial dysfunction was predominantly characterized by presence of elongated mitochondria (B-i) at 2mM 3-NPA, enlarged mitochondria with abnormal cristae (C-i). 3-NPA treatment also showed extensive vacuolations (B-ii, C-ii) (n= 3 experiments per group). The arrows in the representative electron micrographs depict the described pathological features.

**Supplementary figure 4. Assessment of oxidative stress and antioxidant response induced in 3-NPA treated N27 cells.** 3-NPA showed concentration dependent increase in formation of ROS in terms of total hydroperoxides both at 24 h (A) and 48 h (B) of treatment highlighting its dose and time dependence along with increased levels of NO released from the cells (C), both of which were measured according to the manufacturer's instructions. Compromised glutathione dynamics as measured by OPT method, was indicated by decrease in GSH/ GSSG with increasing concentration and time (D- 24 h; E- 48 h) (n= 6 trials per experiment; \*p< 0.05, \*\*p < 0.01, \*\*\*p< 0.001, \*\*\*\*p< 0.0001).

**Supplementary figure 5. Assessment of quality of the microarray data.** mRNA from control and 3-NPA treated N27 cells was utilized for microarray analysis following its hybridization with rat whole genome array (Agilent technologies). Following hybridization, the array was scanned for differences in fluorescence intensities between the control and treatment groups and their qualitative differences were a direct indication of the gene expression. The box plots (A) showing normalized intensity across the duplicates, and principle component analysis (PCA) (D) revealed the data to be of high quality with reproducible results across duplicates. Fold change analysis is represented in the form of box plot (B) showing the median fold change in 3-NPA treatment and volcano plot depicting the upregulated (red) and downregulated (green) genes (C) (n= 2 replicates per group).

**Supplementary figure 6. Functional clustering of genes across Mn/ MPP<sup>+</sup>/ 3-NPA treatment groups.** Kmean clustering of dataset from Mn (A), MPP<sup>+</sup> (B) and 3-NPA (C) treatment showed maximum number of genes in CL6, CL3 and CL3 respectively, indicating the exclusivity of the dataset in 3-NPA treatment. Differentially expressed genes across the three groups as a fraction of their variability plotted as a Pareto graph showed 3-NPA treatment to have maximum effect in terms of gene expression (D).

**Supplementary figure 7. Gene ontology analysis of upregulated (A) and downregulated (B) genes in 3-NPA treated N27 cells showed them to be categorizing into various functional groups including mitochondrial, synaptic and autophagic genes.**

**Supplementary figure 8. *In silico* analysis and network interpretation of differentially expressed transcripts.** Heatmap cluster of drug treated cells according to the pre-defined, ‘canonical’ sub-systems (A) (generated by MATLAB, version 2015b). Pathway map of the N27 cell line specific Pentose sugar metabolism co-set (generated by Escher; URL- <https://escher.github.io>). This pathway was markedly reduced in MPP<sup>+</sup> treated cells, differentiating it from the other neurotoxin (and non-treated) N27 cells (B).

**Supplementary figure 9.** Complete blot of LC3 upon 3-NPA (i, corresponds to figure 4D) and Mn/ MPP<sup>+</sup> (ii, corresponds to figure 4D) treatment along with their corresponding replicates (iii). Complete blot of LC3 upon CQ+ 3-NPA co- treatment (iv, corresponds to figure 4F). For most of the blots, care was taken to retain the full length blot for hybridization of antibody and acquisition of images. In experiments where the primary antibody availability was limited, the nitrocellulose membrane containing the transferred protein was cut based on the molecular weight so as to retain only the areas corresponding to the proteins of interest prior to the treatment with the desired primary antibody or to perform anti  $\beta$ - actin western. The trials correspond to individual experiments (biological replicates). The lanes labeled with text in red have been selected for inclusion in the main figure. The area shown

by red boxes correspond to the respective cropped versions in the main figure.

**Supplementary figure 10.** Complete blot of p62 in 3-NPA, Mn and MPP<sup>+</sup> treatment (i, corresponds to figure 4I) with their corresponding replicates (iii- iv). Expression level of p62 upon CQ+ 3-NPA co- treatment (v, corresponds to figure 4F) and its replicate (vi). For most of the blots care was taken to retain the full length blot for hybridization of antibody and acquisition of images. In experiments where the primary antibody availability was limited, the nitrocellulose membrane containing the transferred protein was cut based on the molecular weight so as to retain only the areas corresponding to the proteins of interest prior to the treatment with the desired primary antibody or to perform anti  $\beta$ - actin western. The trials correspond to individual experiments (biological replicates). The lanes labeled with text in red have been selected for inclusion in the main figure. The area shown by red boxes correspond to the respective cropped versions in the main figure.

**Supplementary figure 11.** Complete blot for LAMP1 (I, corresponds to figure 4K) and its replicate upon Mn/ MPP<sup>+</sup> and 3-NPA treatment. Complete blot depicting the expression levels of AMPK (ii, corresponds to figure 5A), pAMPK (iii, corresponds to figure 5A) and mTOR (iv, corresponds to figure 5A) with their corresponding replicates (C= control, T= 3-NPA treated). For most of the blots care was taken to retain the full length blot for hybridization of antibody and acquisition of images. In experiments where the primary antibody availability was limited, the nitrocellulose membrane containing the transferred protein was cut based on the molecular weight so as to retain only the areas corresponding to the proteins of interest prior to the treatment with the desired primary antibody or to perform anti  $\beta$ - actin western. The trials correspond to individual experiments (biological replicates). The lanes labeled with text in red have been selected for inclusion in the main figure. The area shown by red boxes correspond to the respective cropped versions in the main figure.

**Supplementary figure 12.** Complete blot for mTORC1 components and its downstream

targets including RPTOR (i, corresponds to figure 5D), PRAS40 (ii, corresponds to figure 5D), S6K1 (iii, corresponds to figure 5D) and EIF4Ebp1 (iv, corresponds to figure 5D) with their replicates (v) (C= control, T= 3-NPA treated). For most of the blots care was taken to retain the full length blot for hybridization of antibody and acquisition of images. In experiments where the primary antibody availability was limited, the nitrocellulose membrane containing the transferred protein was cut based on the molecular weight so as to retain only the areas corresponding to the proteins of interest prior to the treatment with the desired primary antibody or to perform anti  $\beta$ - actin western. The trials correspond to individual experiments (biological replicates). The lanes labeled with text in red have been selected for inclusion in the main figure. The area shown by red boxes correspond to the respective cropped versions in the main figure.

**Supplementary figure 13.** Complete blot depicting the phosphorylation status of mTORC1 components and its downstream targets including pPRAS40 (i, corresponds to figure 5D), pS6K1 (ii, corresponds to figure 5D) and pEIF4Ebp1 (iii) with their replicates (iv, corresponds to figure 5D) (C= control, T= 3-NPA treated). For most of the blots care was taken to retain the full length blot for hybridization of antibody and acquisition of images. In experiments where the primary antibody availability was limited, the nitrocellulose membrane containing the transferred protein was cut based on the molecular weight so as to retain only the areas corresponding to the proteins of interest prior to the treatment with the desired primary antibody or to perform anti  $\beta$ - actin western. The trials correspond to individual experiments (biological replicates). The lanes labeled with text in red have been selected for inclusion in the main figure. The area shown by red boxes correspond to the respective cropped versions in the main figure.

**Supplementary figure 14.** Complete blot for mTORC2 components and its downstream targets including RICTOR (i, corresponds to figure 5G), mSIN1 (ii, corresponds to figure 5G)



and AKT (iii, corresponds to figure 5G) with their respective replicates (C= control, T= 3-NPA treated). For most of the blots care was taken to retain the full length blot for hybridization of antibody and acquisition of images. In experiments where the primary antibody availability was limited, the nitrocellulose membrane containing the transferred protein was cut based on the molecular weight so as to retain only the areas corresponding to the proteins of interest prior to the treatment with the desired primary antibody or to perform anti  $\beta$ - actin western. The trials correspond to individual experiments (biological replicates). The lanes labeled with text in red have been selected for inclusion in the main figure. The area shown by red boxes correspond to the respective cropped versions in the main figure.

**Supplementary figure 15.** Complete blot depicting the phosphorylation status of mTORC2 components and its downstream targets including pmSIN1 (i, corresponds to figure 5G), pAKT(T308) (ii, corresponds to figure 5G) and pAKT(S473) (iii, corresponds to figure 5G) with their respective replicates (C= control, T= 3-NPA treated). For most of the blots care was taken to retain the full length blot for hybridization of antibody and acquisition of images. In experiments where the primary antibody availability was limited, the nitrocellulose membrane containing the transferred protein was cut based on the molecular weight so as to retain only the areas corresponding to the proteins of interest prior to the treatment with the desired primary antibody or to perform anti  $\beta$ - actin western. The trials correspond to individual experiments (biological replicates). The lanes labeled with text in red have been selected for inclusion in the main figure. The area shown by red boxes correspond to the respective cropped versions in the main figure.

**Supplementary figure 16.** Complete blot of autophagic marker BECN1 (i, corresponds to figure 6A) in 3-NPA toxicity along with its dose (ii, corresponds to figure 6D) and time dependence (iv, corresponds to figure 6H) with their respective replicates (iii). Complete blot for caspase 9 with its replicated upon 3-NPA treatment (v, corresponds to figure 6A) (C=

control, T= 3-NPA treated). For most of the blots care was taken to retain the full length blot for hybridization of antibody and acquisition of images. In experiments where the primary antibody availability was limited, the nitrocellulose membrane containing the transferred protein was cut based on the molecular weight so as to retain only the areas corresponding to the proteins of interest prior to the treatment with the desired primary antibody or to perform anti  $\beta$ - actin western. The trials correspond to individual experiments (biological replicates). The lanes labeled with text in red have been selected for inclusion in the main figure. The area shown by red boxes correspond to the respective cropped versions in the main figure.

**Supplementary figure 17.** Complete blot for apoptotic markers including BCL2 (i, corresponds to figure 6A) and caspase-3 (vii, corresponds to figure 6A) along with their replicates. Dose and time dependence of expression of apoptotic marker BCL2 (ii- iii, corresponds to figure 6D and H) and autophagic marker p62 (iv, vi) with their replicates (v, corresponds to figure 6D and H) following 3-NPA treatment (C= control, T= 3-NPA treated). For most of the blots care was taken to retain the full length blot for hybridization of antibody and acquisition of images. In experiments where the primary antibody availability was limited, the nitrocellulose membrane containing the transferred protein was cut based on the molecular weight so as to retain only the areas corresponding to the proteins of interest prior to the treatment with the desired primary antibody or to perform anti  $\beta$ - actin western. The trials correspond to individual experiments (biological replicates). The lanes labeled with text in red have been selected for inclusion in the main figure. The area shown by red boxes correspond to the respective cropped versions in the main figure.

**Supplementary figure 18.** Complete blot depicting BDNF expression upon 3-NPA treatment in N27 cells (i, corresponds to figure 7A). Expression level of p62 (ii, corresponds to figure 7C) and LAMP1 (iii, corresponds to figure 7C) upon BDNF and 3-NPA co-treatment. Complete blot of AKT (iv, corresponds to figure 7G) and its phosphorylation at S473 (v,

corresponds to figure 7G) during BDNF and 3-NPA co-treatment (C= control, T= 3-NPA treated). For most of the blots care was taken to retain the full length blot for hybridization of antibody and acquisition of images. In experiments where the primary antibody availability was limited, the nitrocellulose membrane containing the transferred protein was cut based on the molecular weight so as to retain only the areas corresponding to the proteins of interest prior to the treatment with the desired primary antibody or to perform anti  $\beta$ - actin western. The trials correspond to individual experiments (biological replicates). The lanes labeled with text in red have been selected for inclusion in the main figure. The area shown by red boxes correspond to the respective cropped versions in the main figure.

**Supplementary figure 19.** Representative blots of  $\beta$ - actin depicting equal load used as loading control and for protein normalization (i- ii, correspond to figure 4D; iii correspond to figure 4F; iv correspond to figure 4K, v correspond to figure 4I; vi correspond to figure 5A; vii correspond to figure 5D; viii correspond to figure 5G; ix correspond to figure 6A; x correspond to figure 6D; xi correspond to figure 7A; xii correspond to figure 6H; xiii correspond to figure 7C; xiv correspond to figure 7G) (C= control, T= 3-NPA treated). The images correspond to the nitrocellulose membrane containing the transferred protein which was cut so as to retain only the area corresponding to the protein of interest prior to hybridization with the primary antibody. The trials correspond to individual experiments (biological replicates). The lanes labeled with text in red have been selected for inclusion in the main figure. The area shown by red boxes correspond to the respective cropped versions in the main figure.

**Supplementary spreadsheets have been enclosed as a separate MS- Excel file.**

Supplementary figure 1

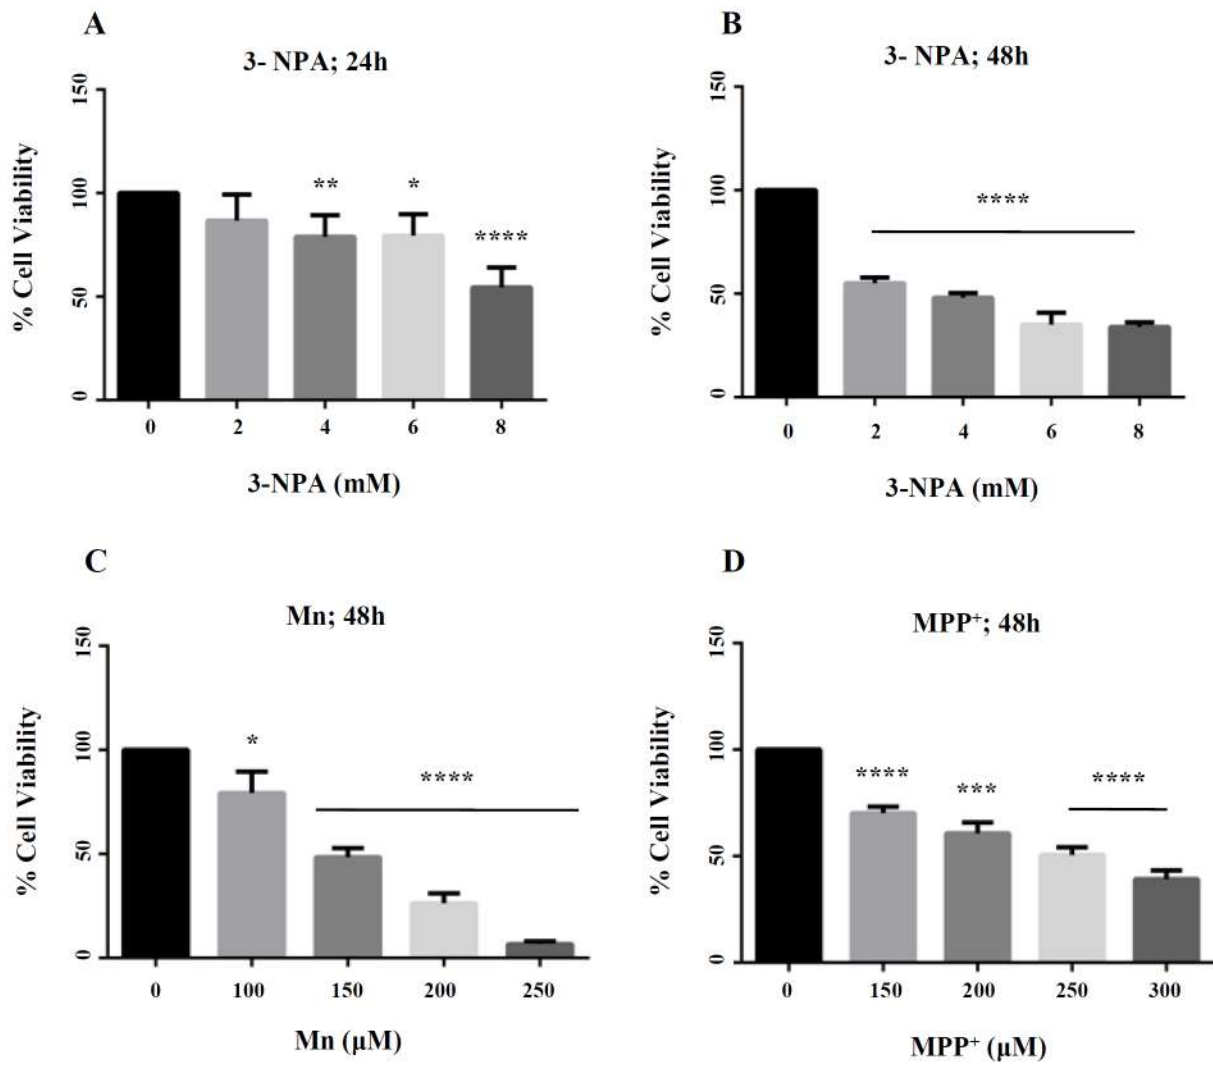

E

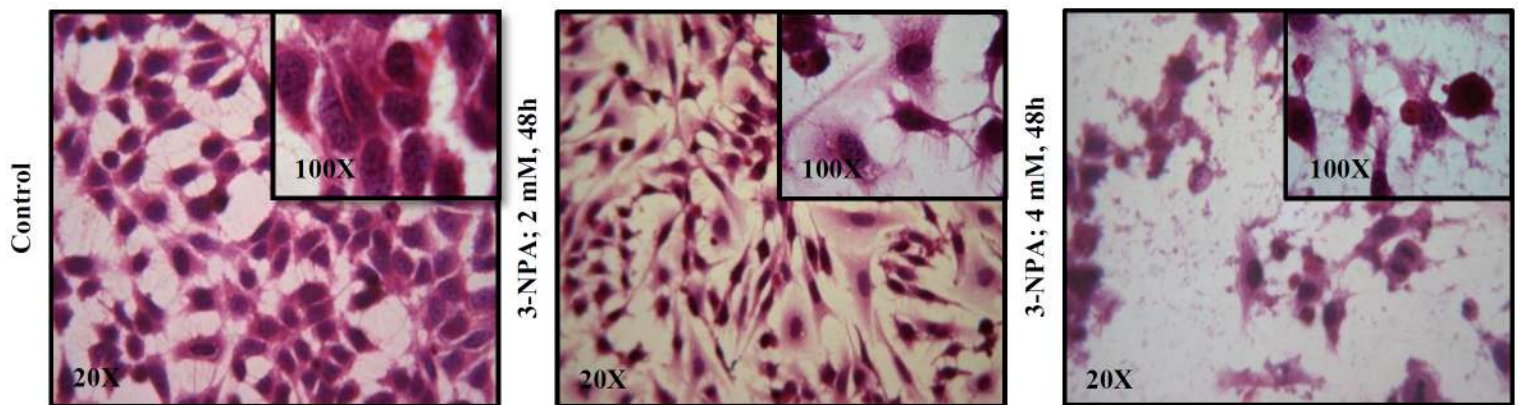

Supplementary figure 2

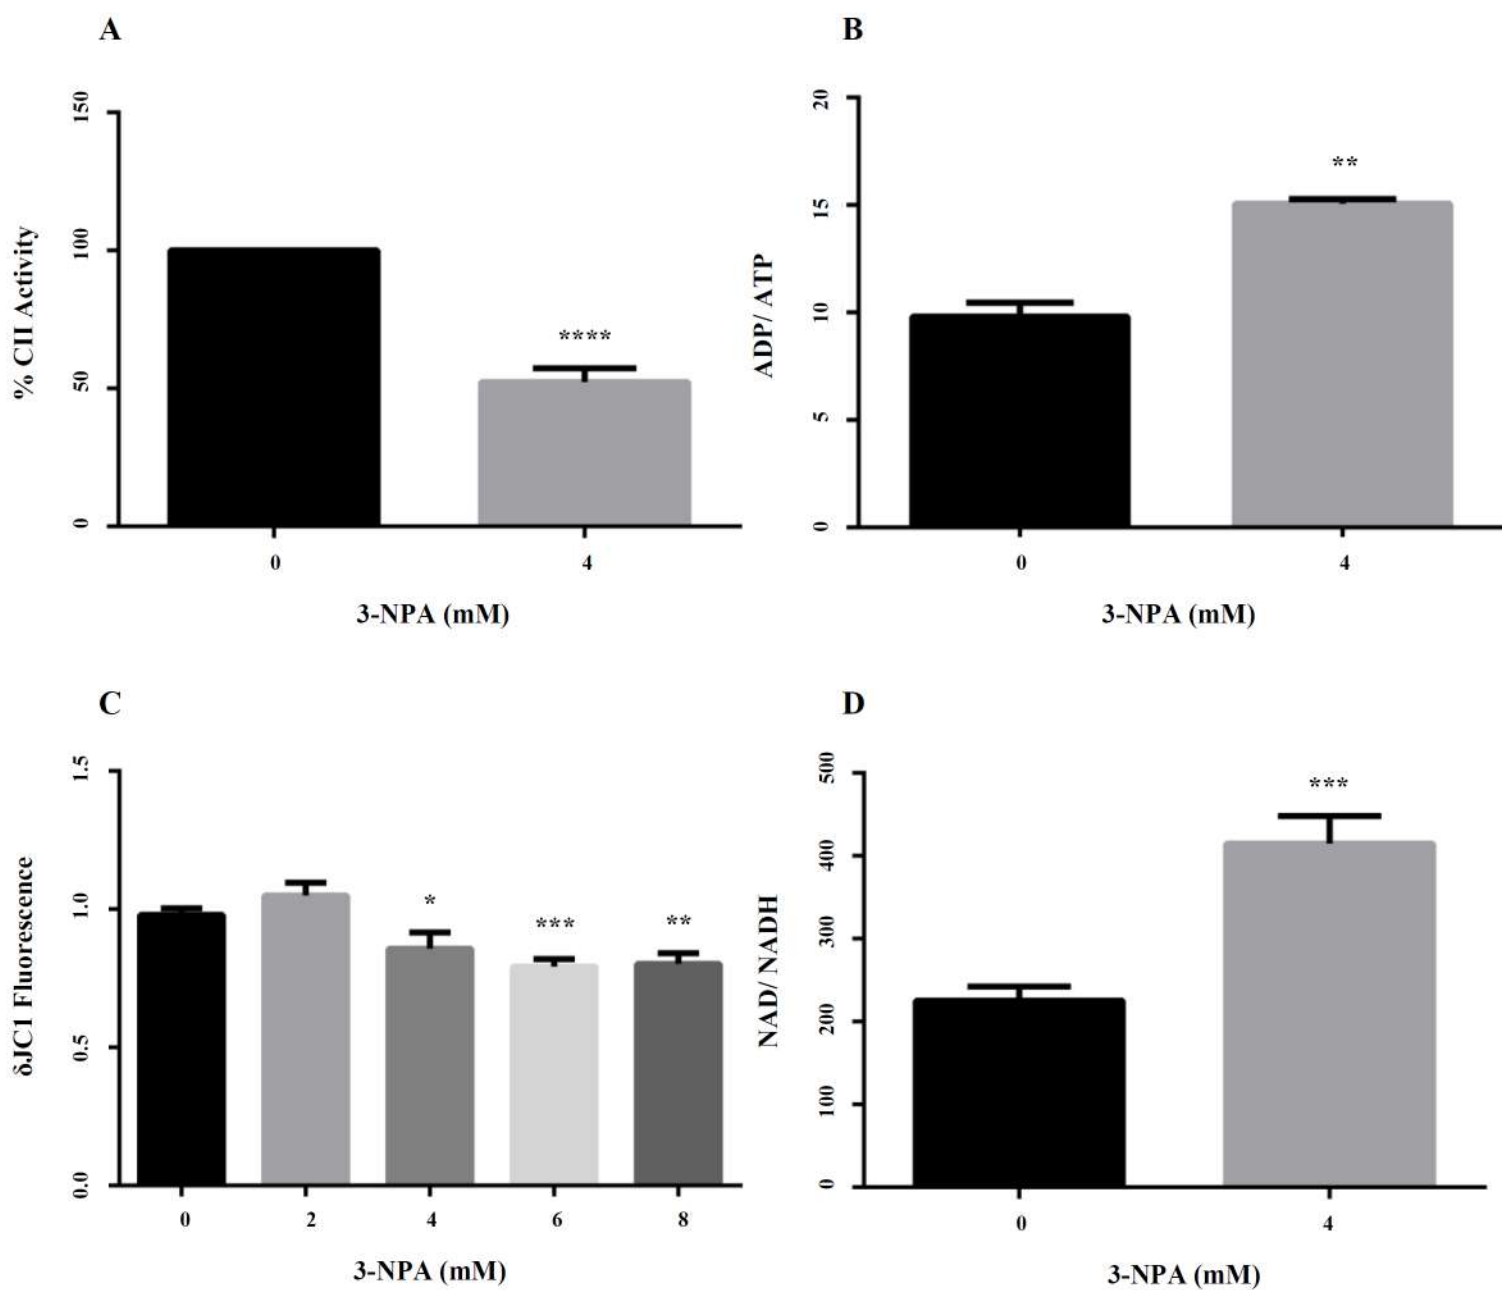

Supplementary figure 3

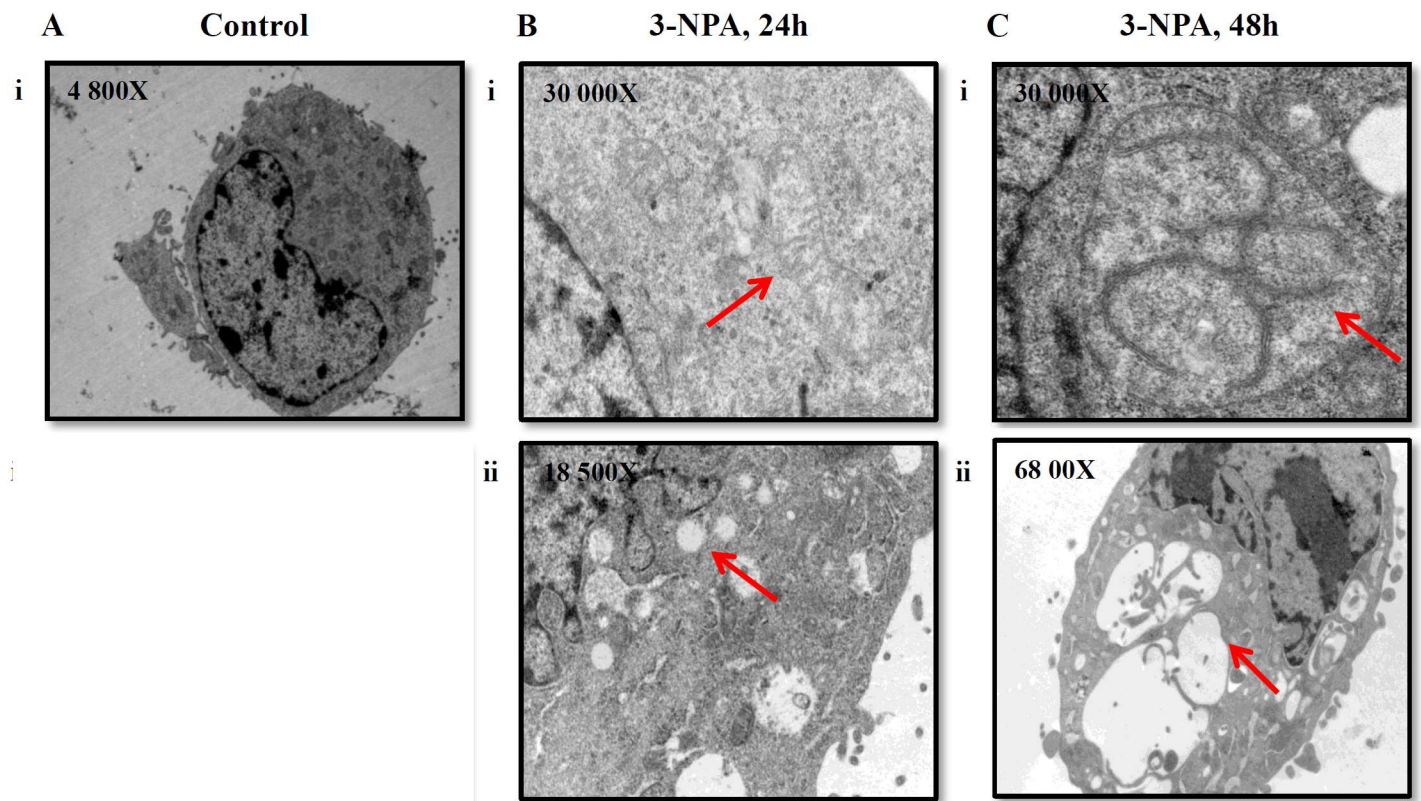

Supplementary figure 4

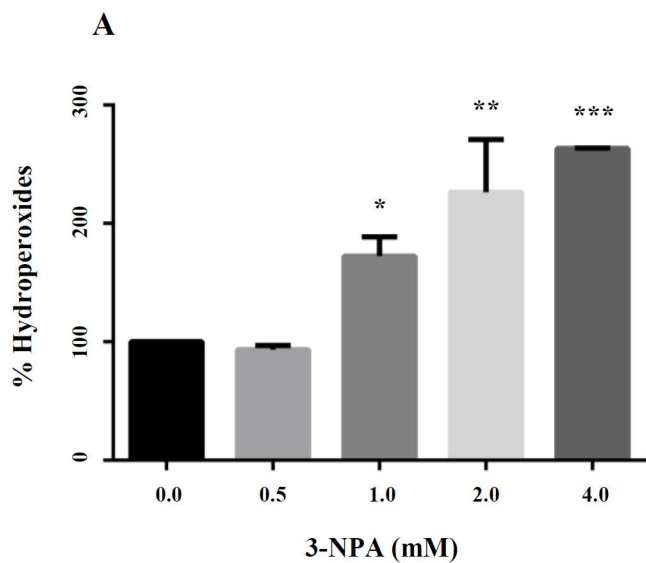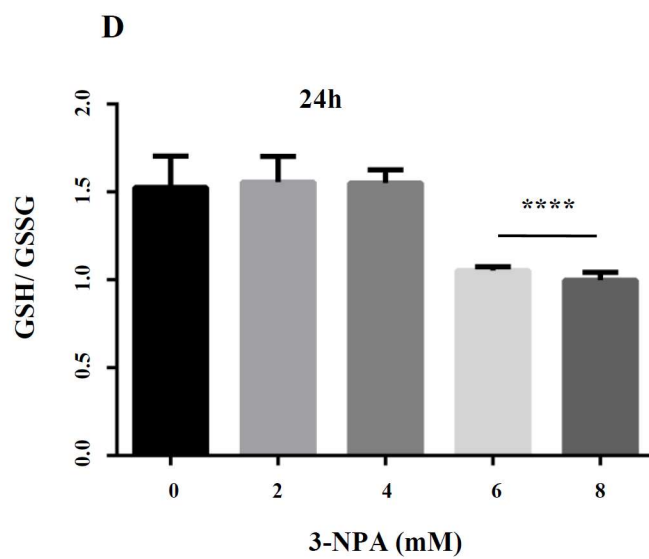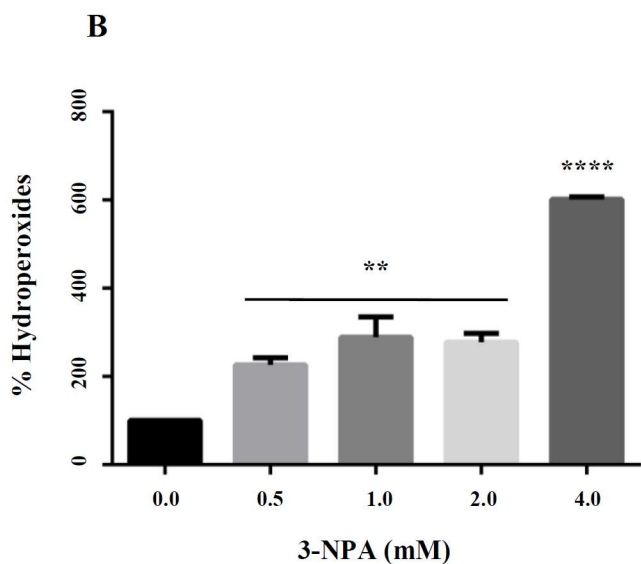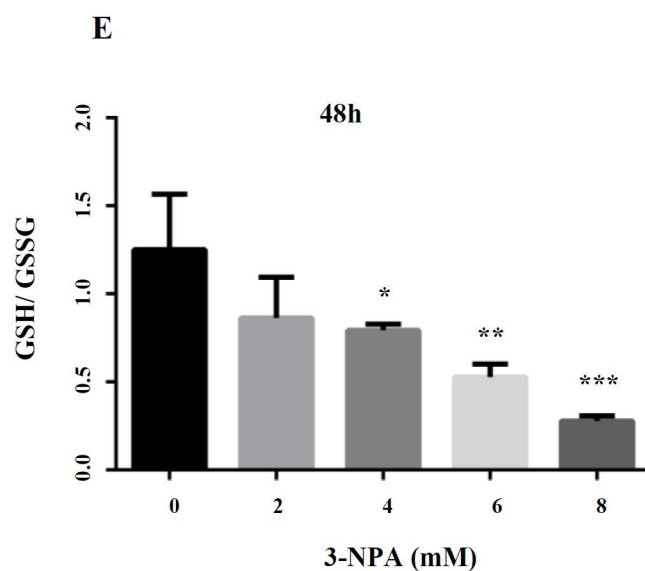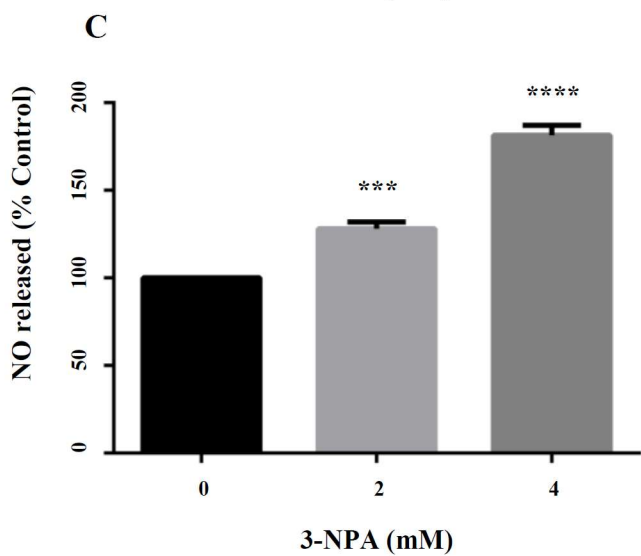

Supplementary figure 5

**A**

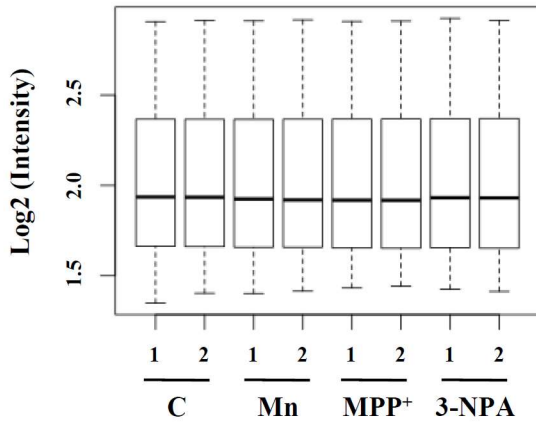

**B**

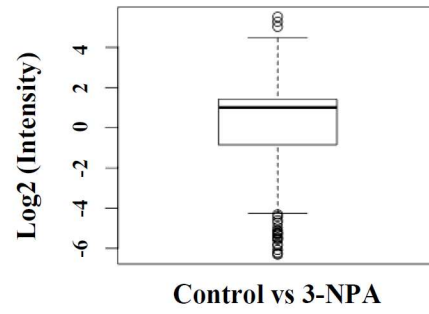

**C**

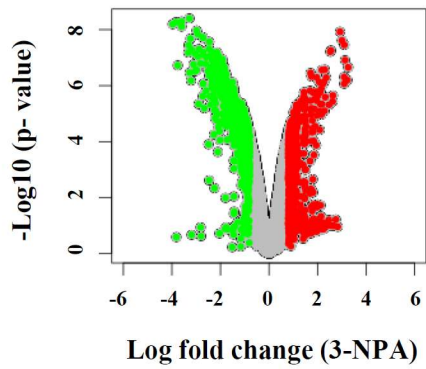

**D**

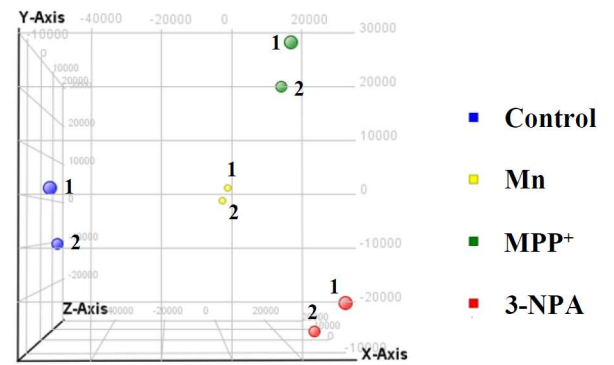



## Supplementary figure 6

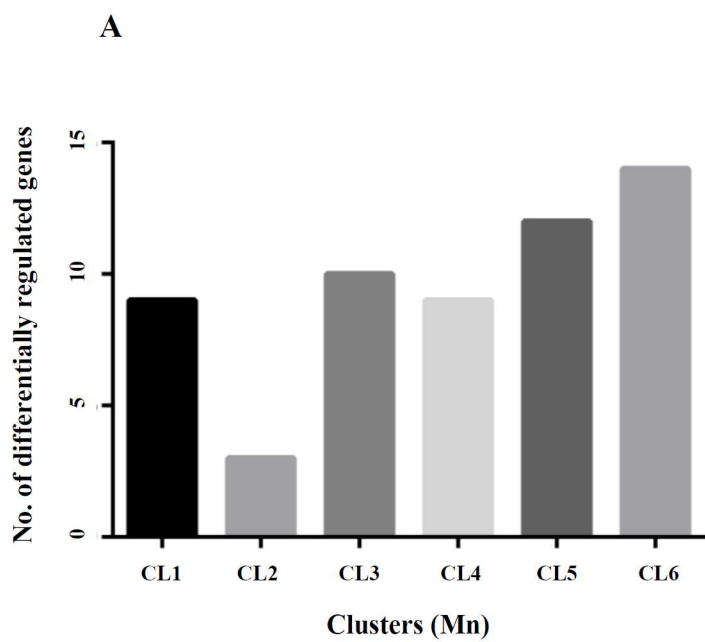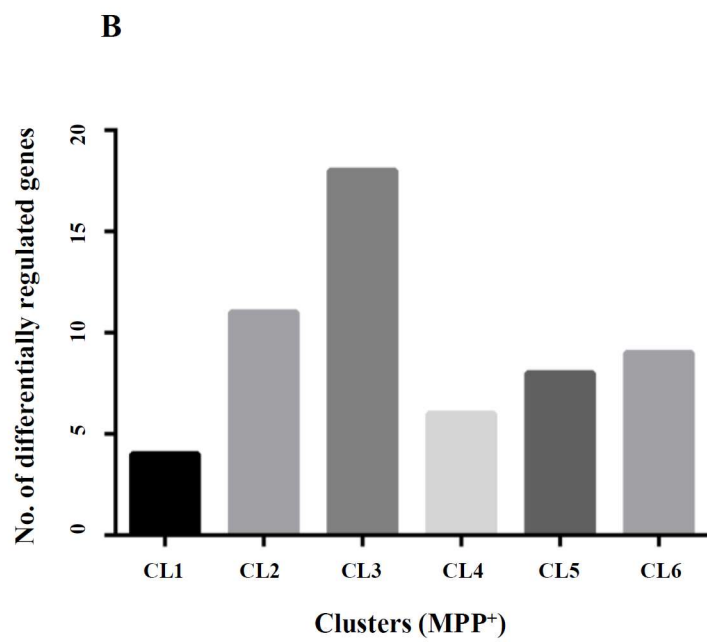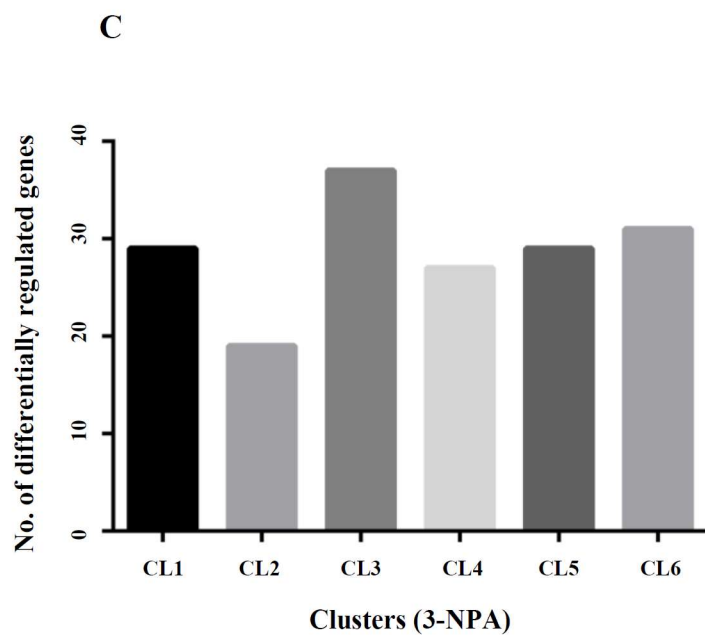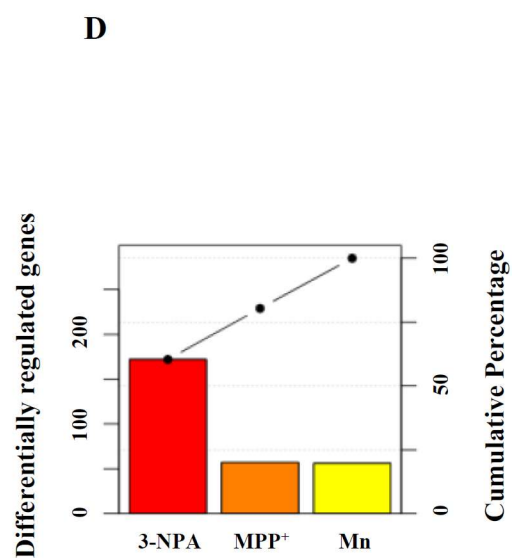

## Supplementary figure 7

**A**

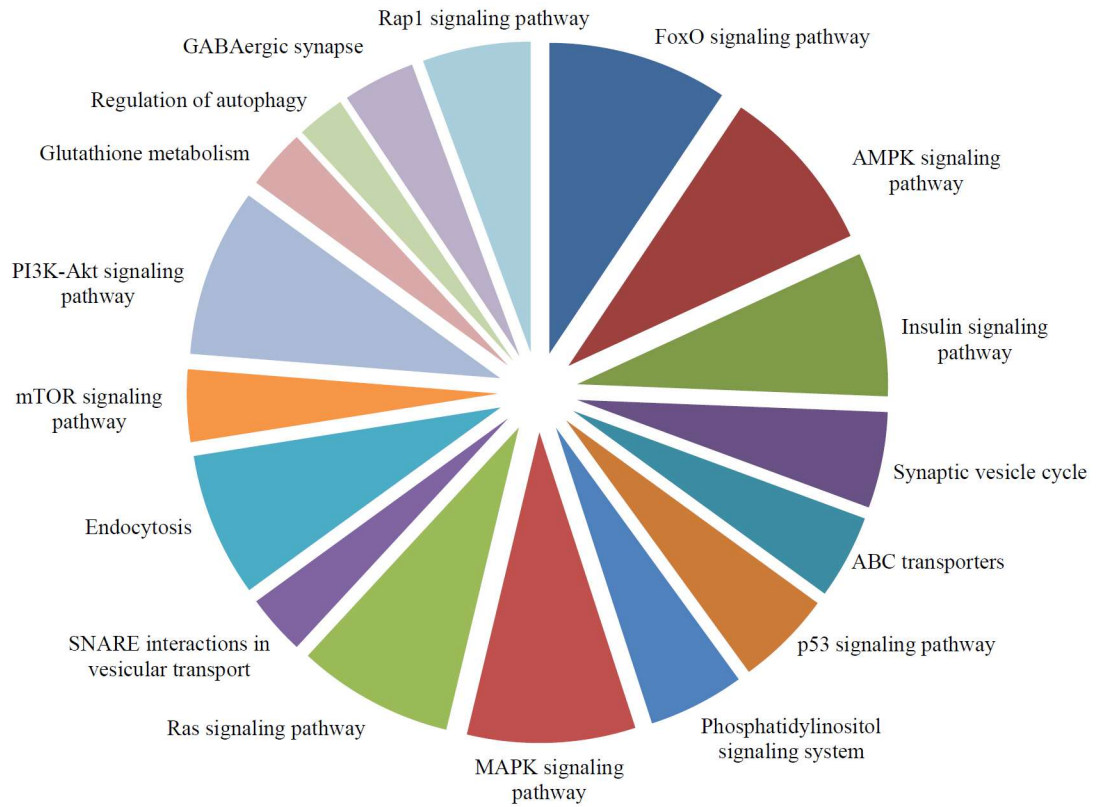

**B**

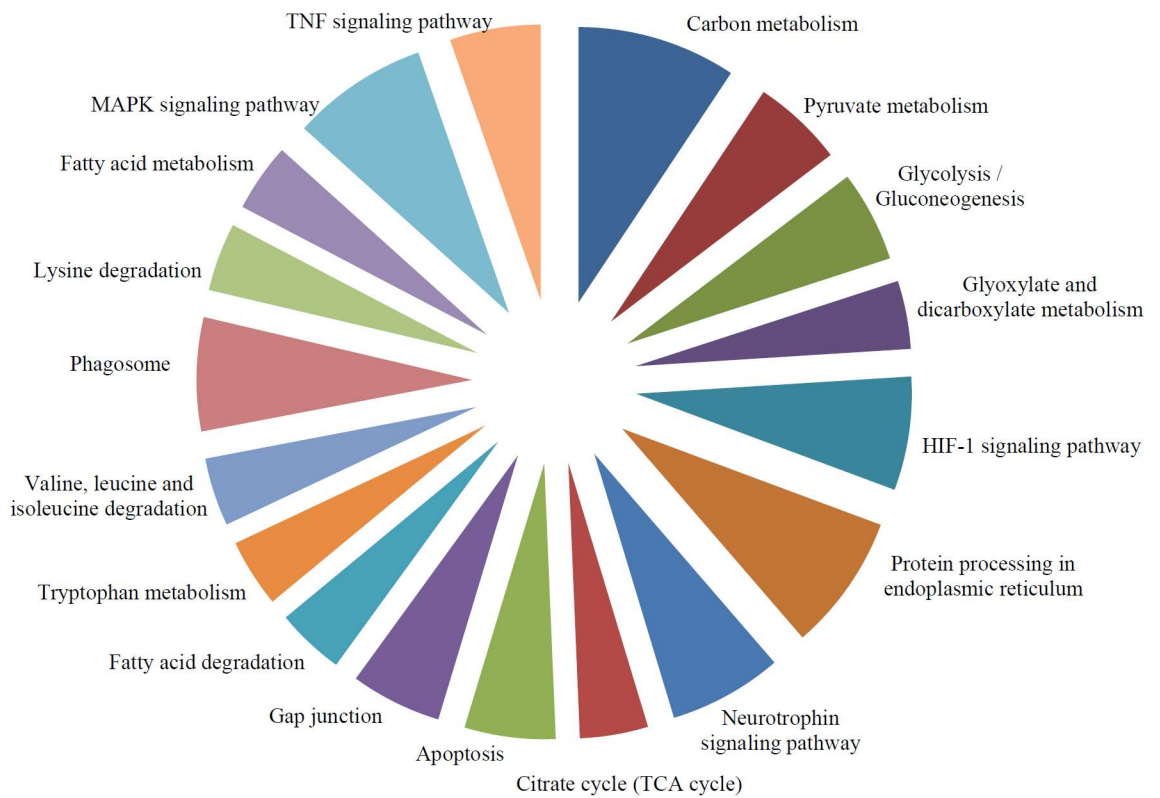

Supplementary figure 8

A

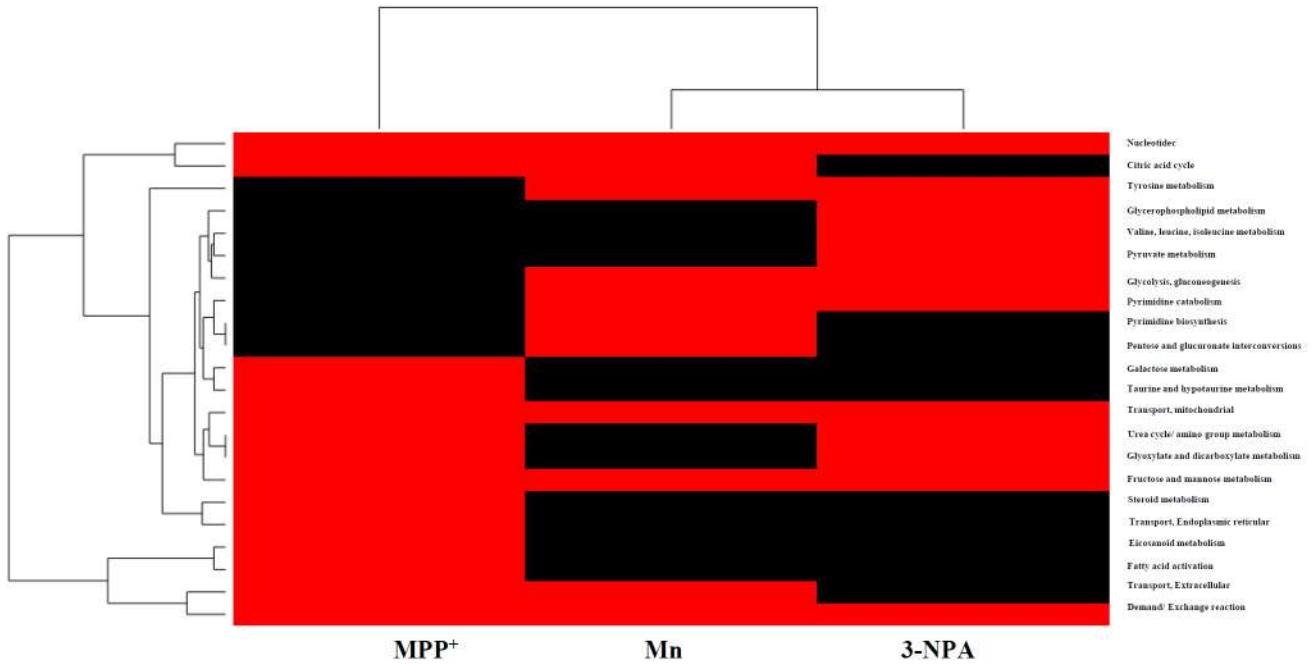

B

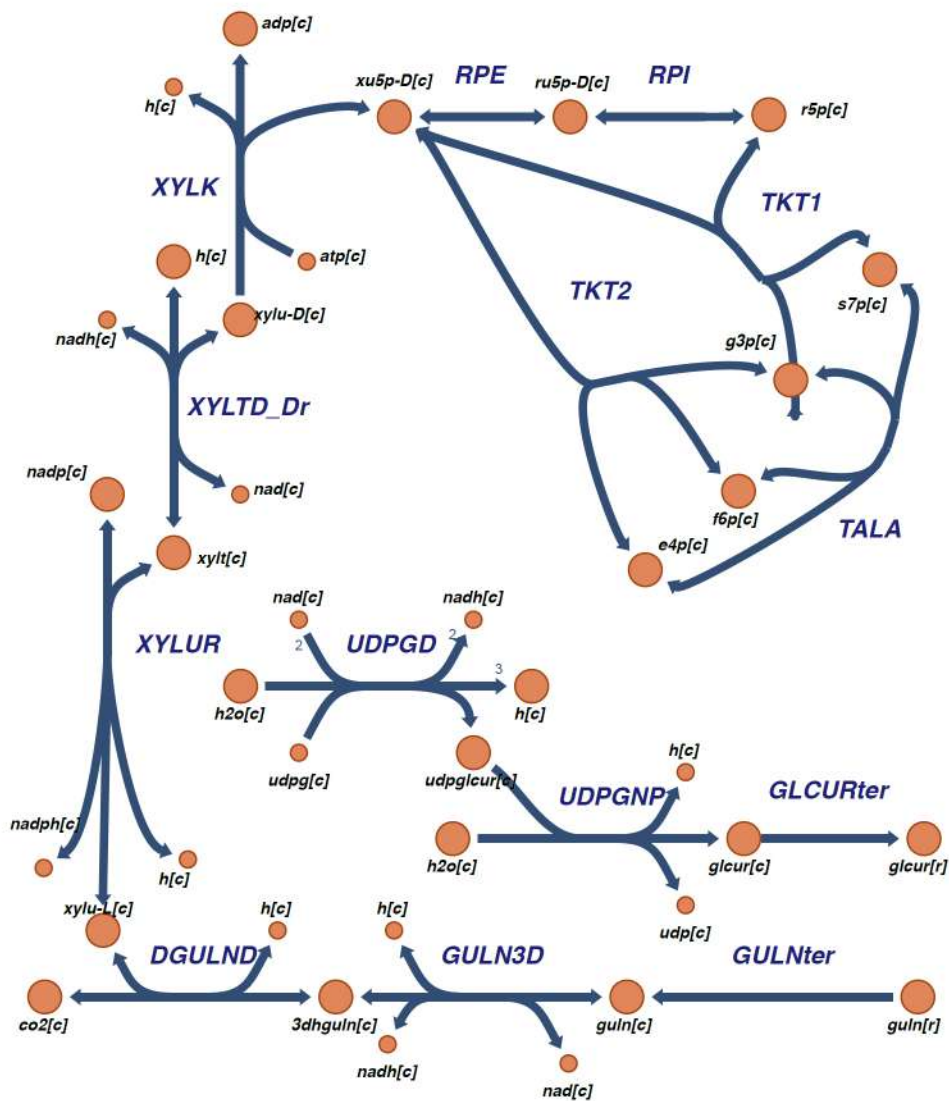

# Supplementary figure 9

i

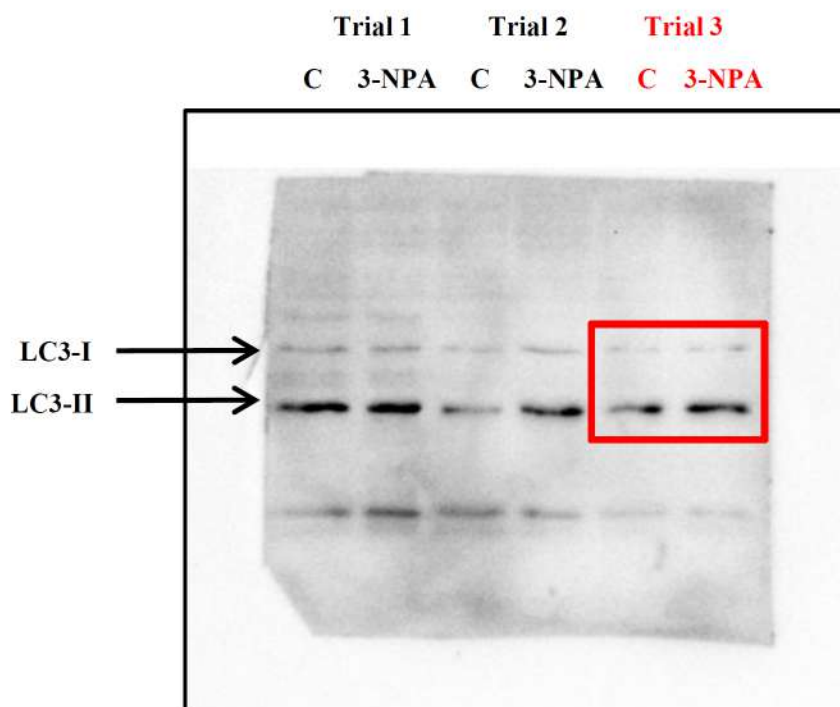

ii

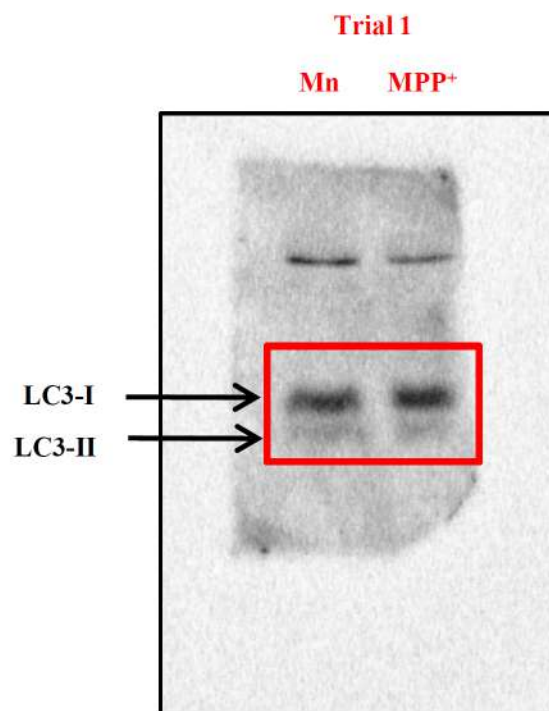

iii

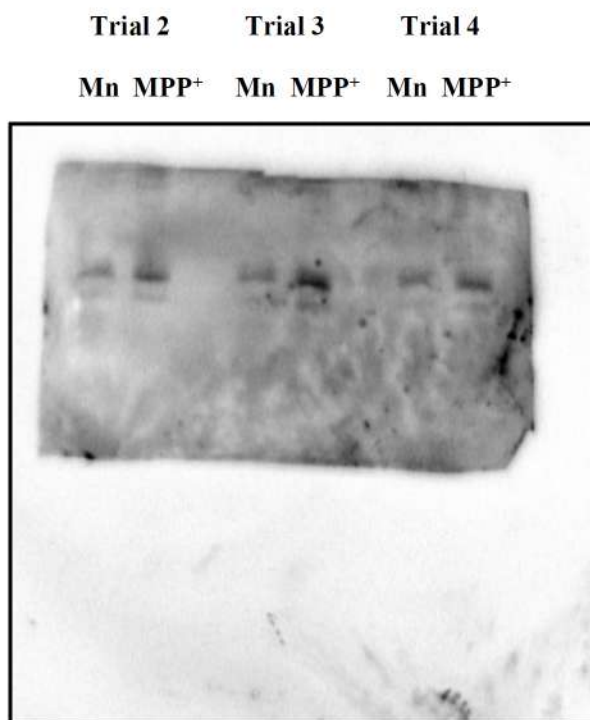

iv

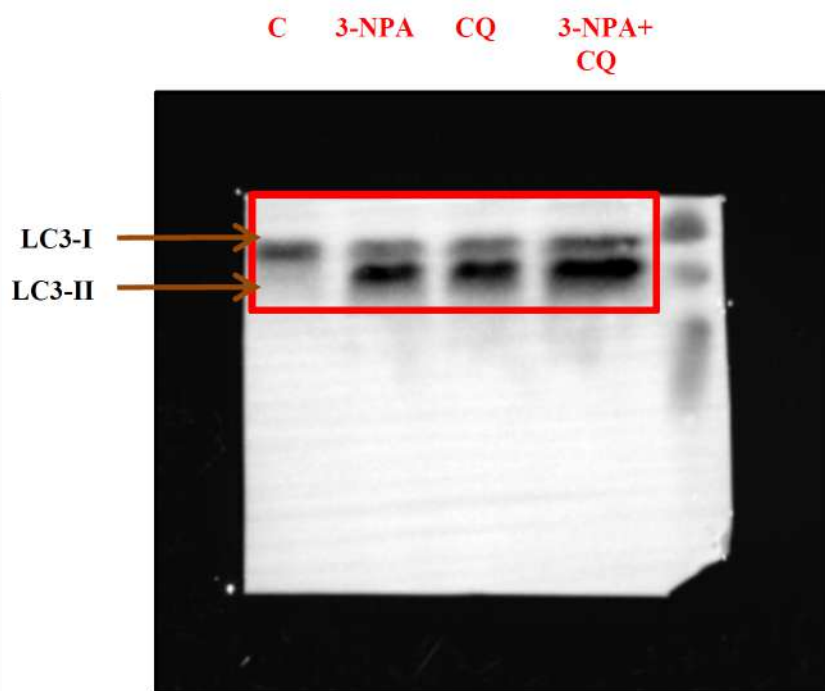

# Supplementary figure 10

i

**Trial 1**  
C Mn MPP<sup>+</sup> 3-NPA

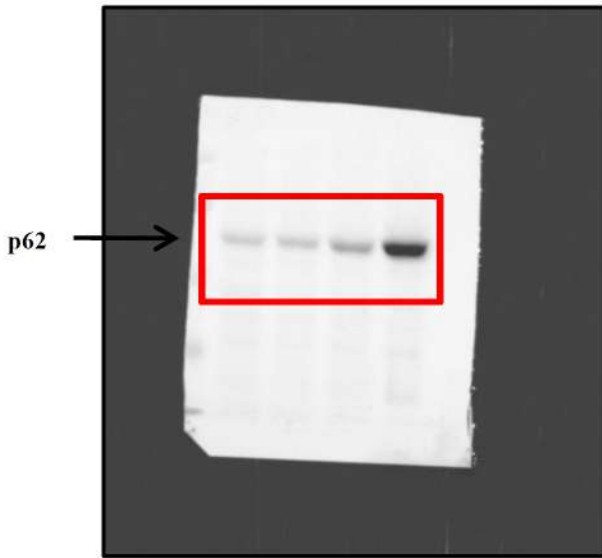

ii

C Mn MPP<sup>+</sup> 3-NPA

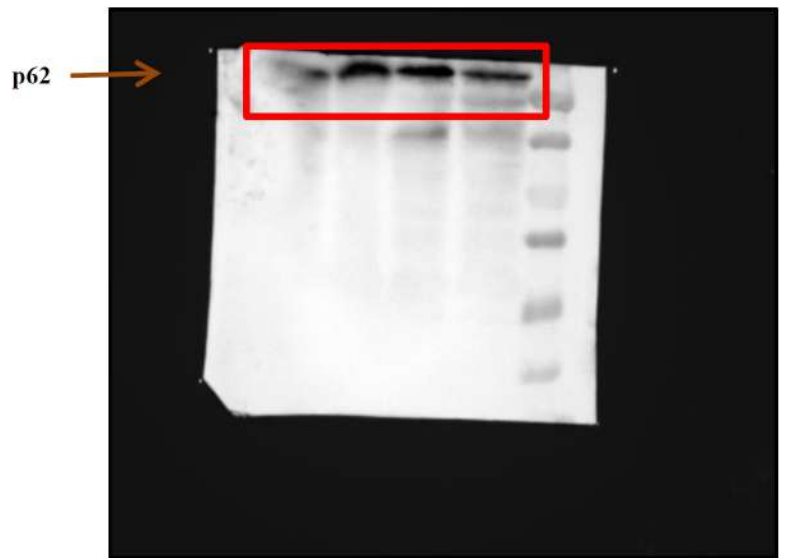

iii

**Trial 2**  
C Mn MPP<sup>+</sup>

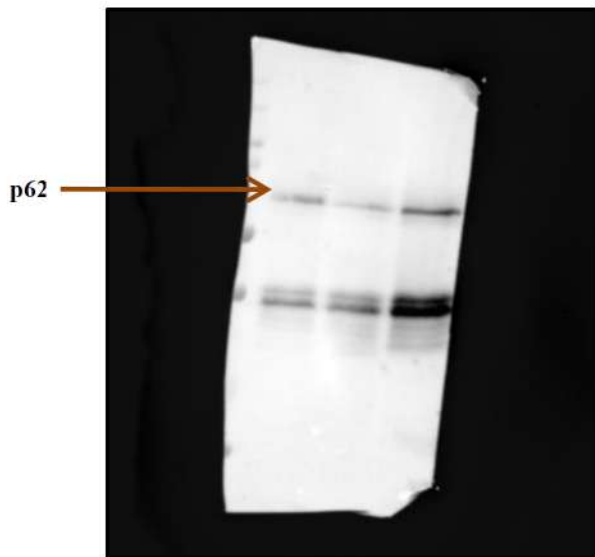

iv

**Trial 3**    **Trial 4**    **Trial 5**  
C 3-NPA    C 3-NPA    C 3-NPA

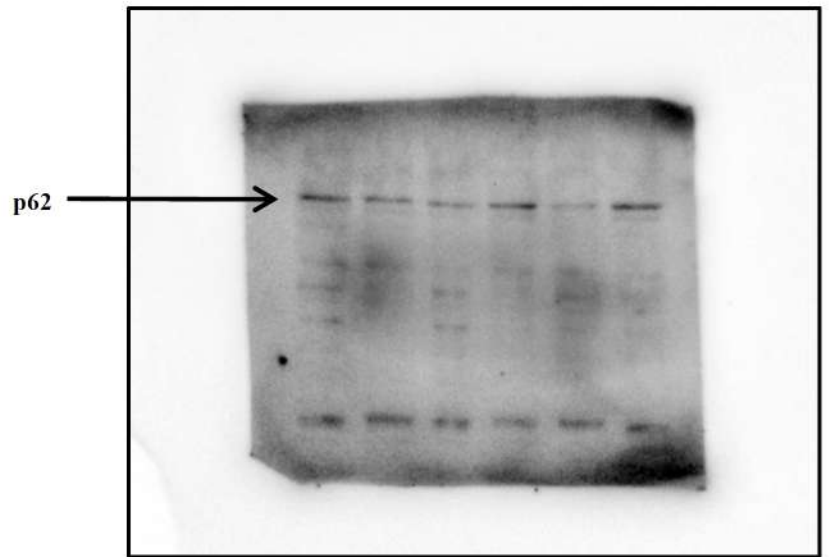

v

**Trial 1**  
C 3-NPA CQ 3-NPA+CQ

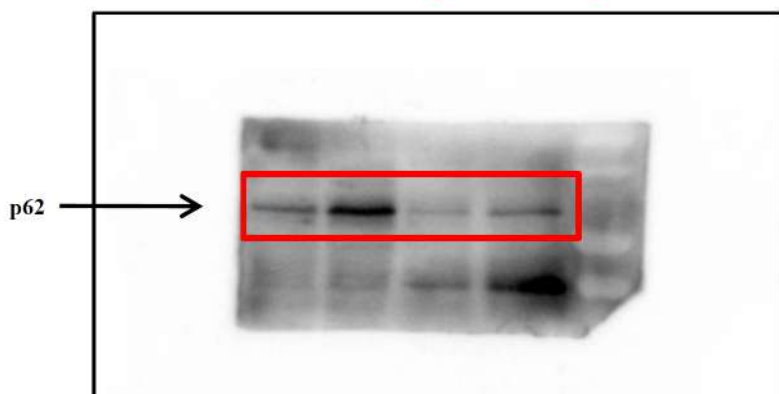

vi

**Trial 2**  
C 3-NPA CQ 3-NPA+CQ

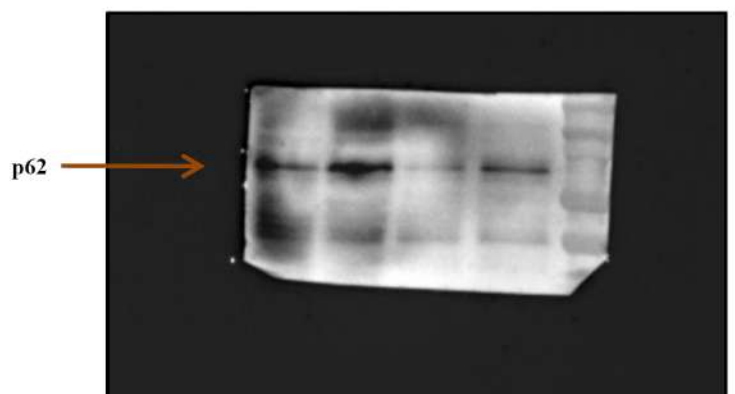

# Supplementary figure 11

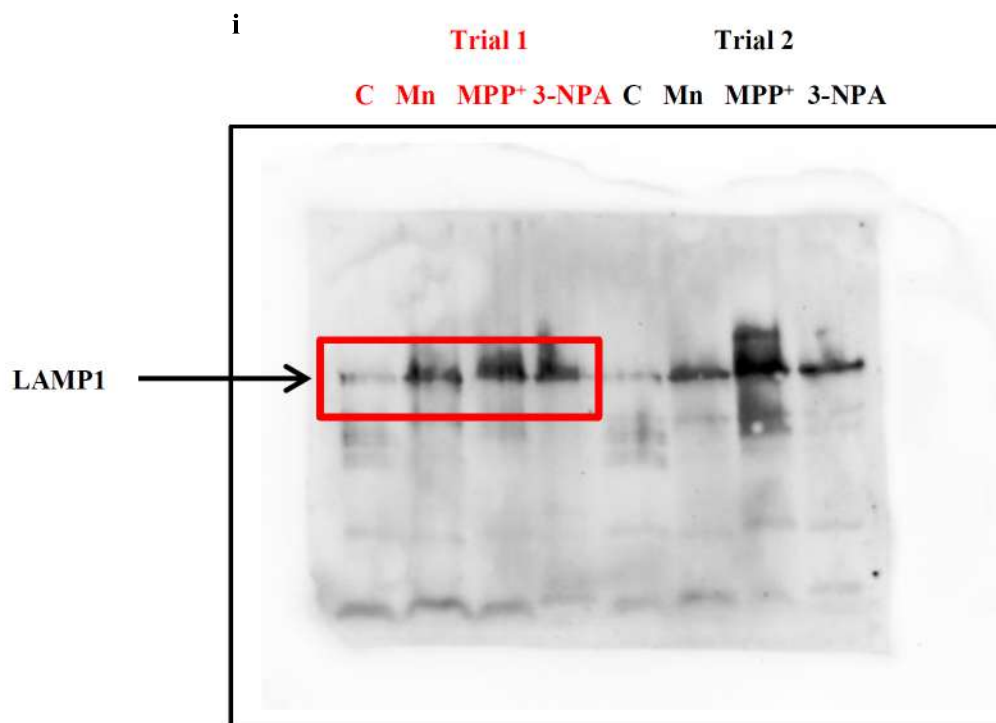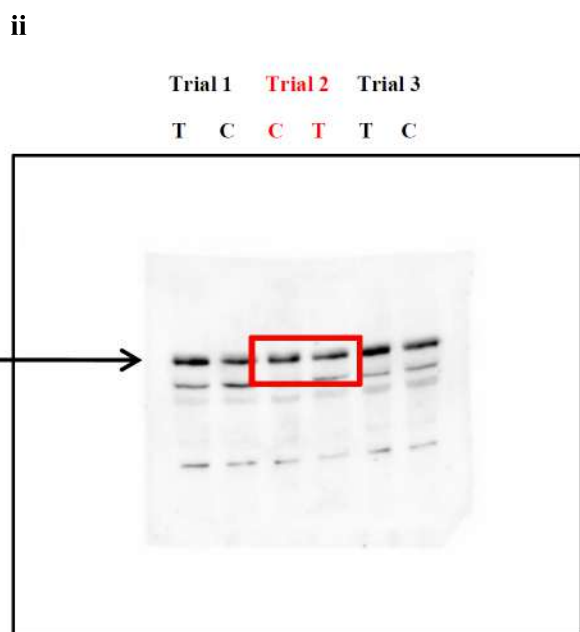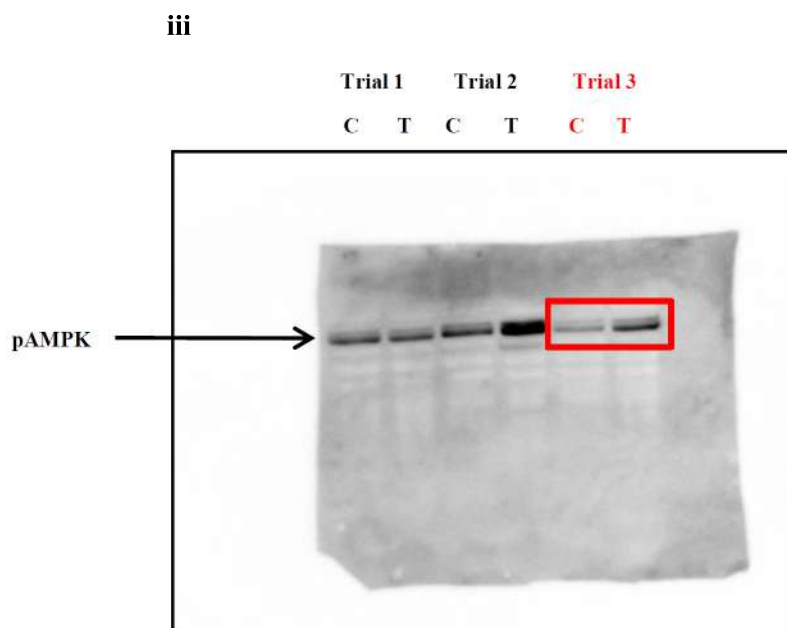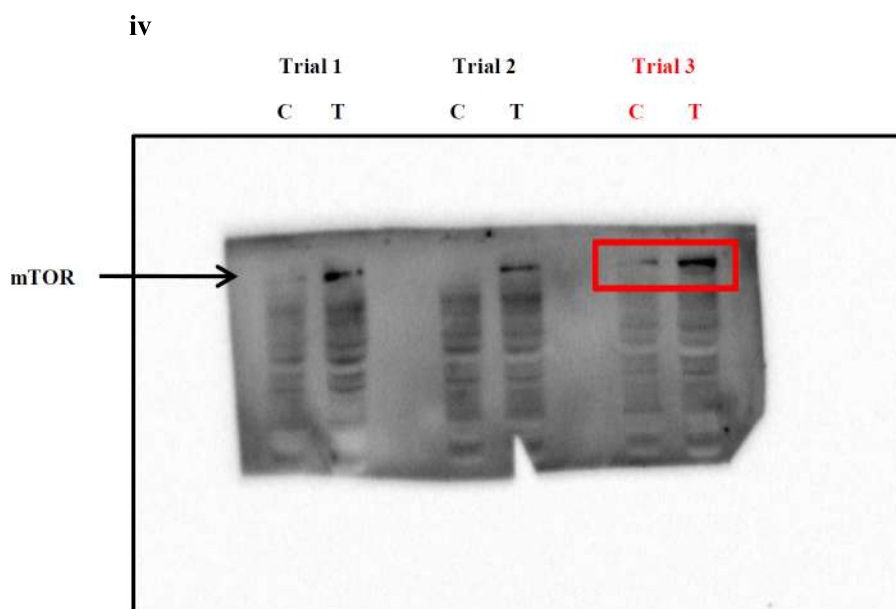



# Supplementary figure 12

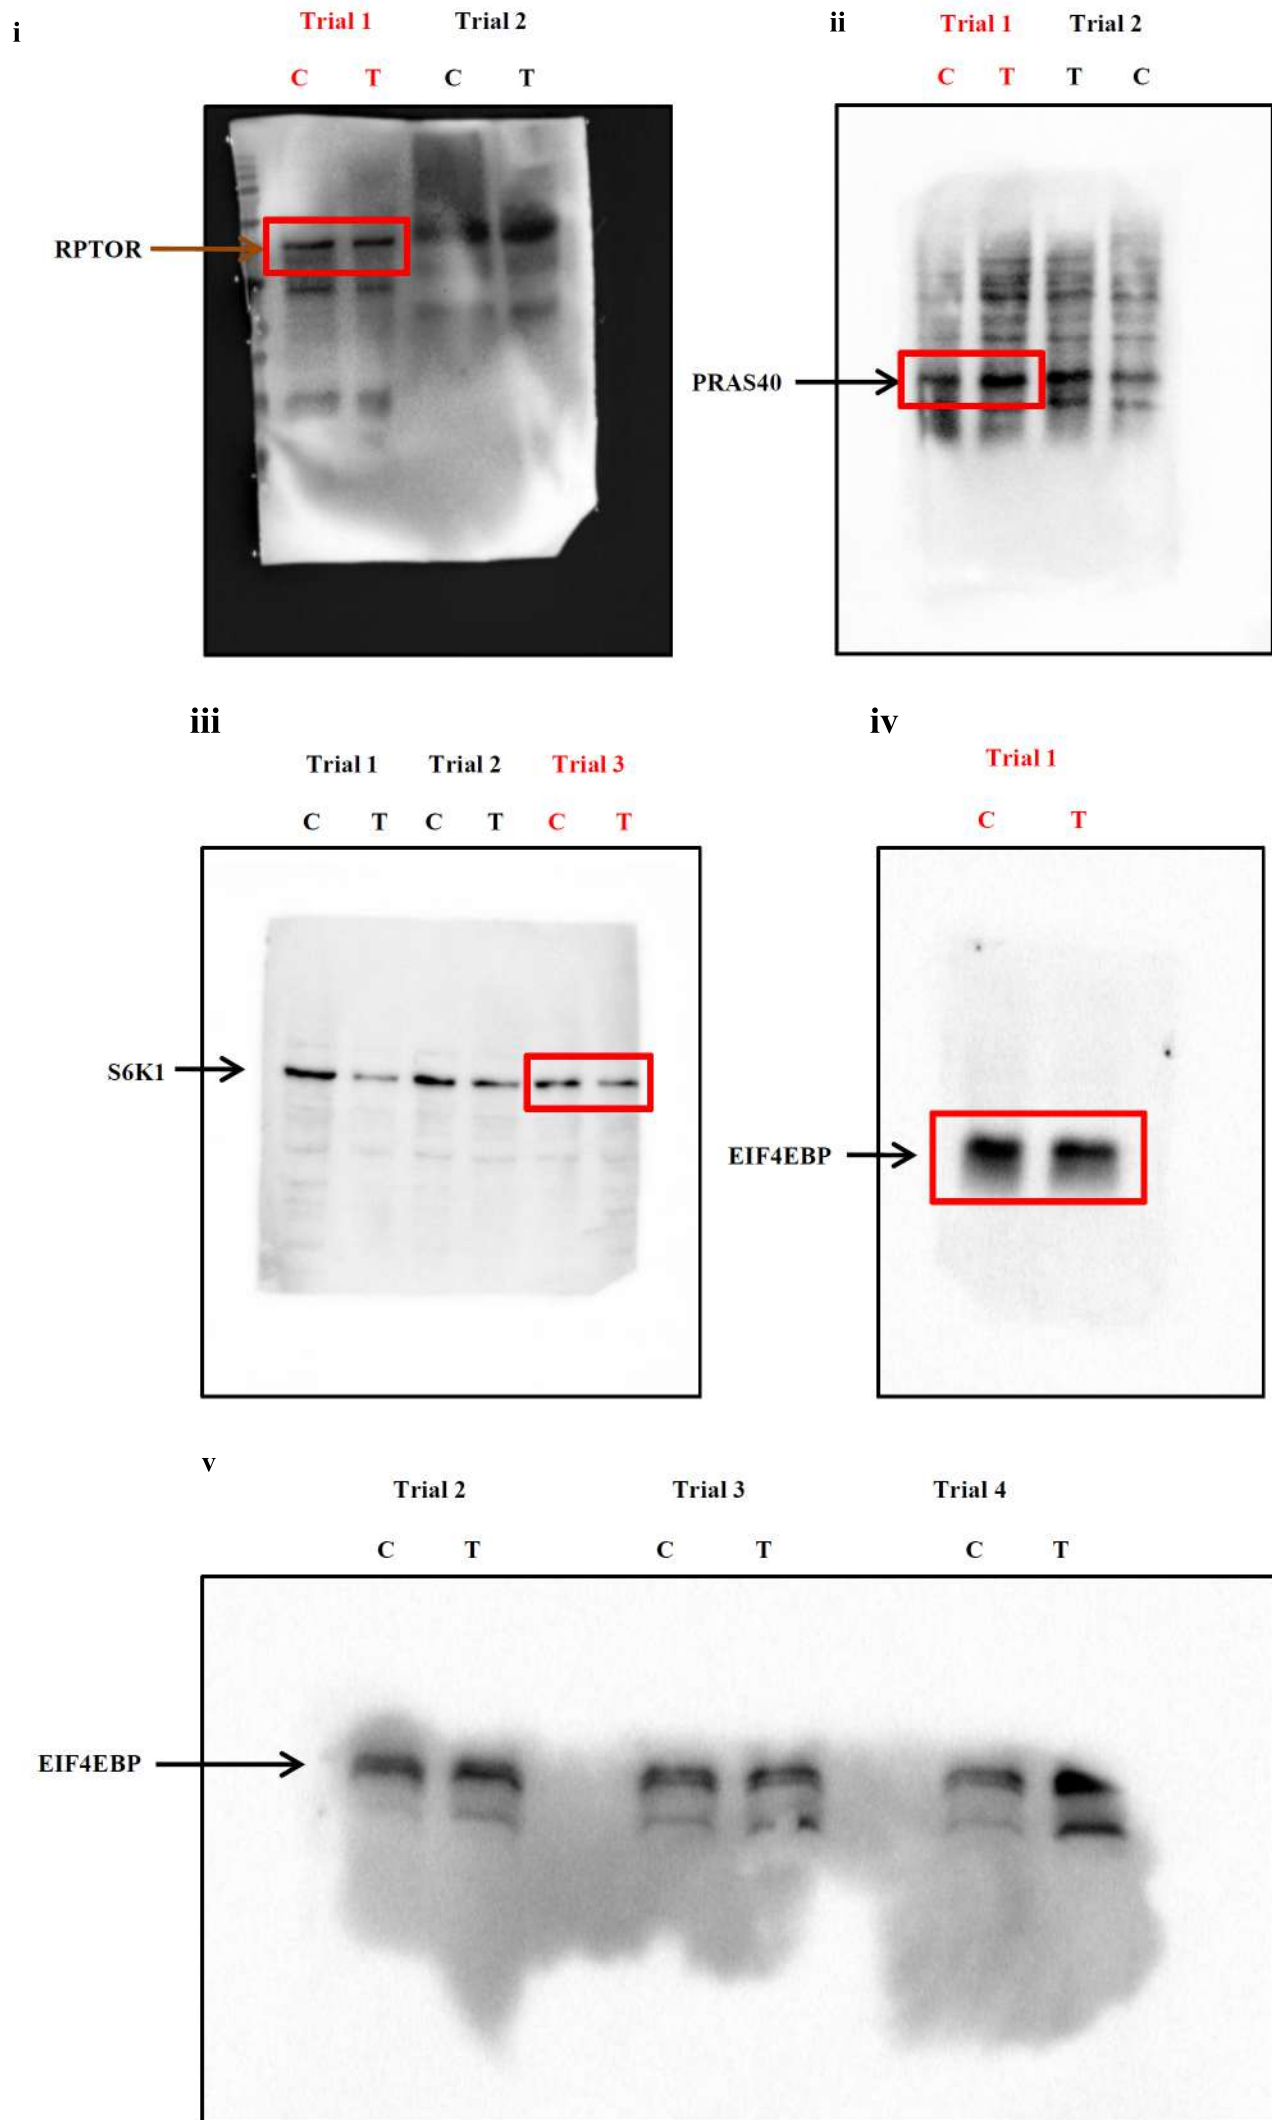

# Supplementary figure 13

i

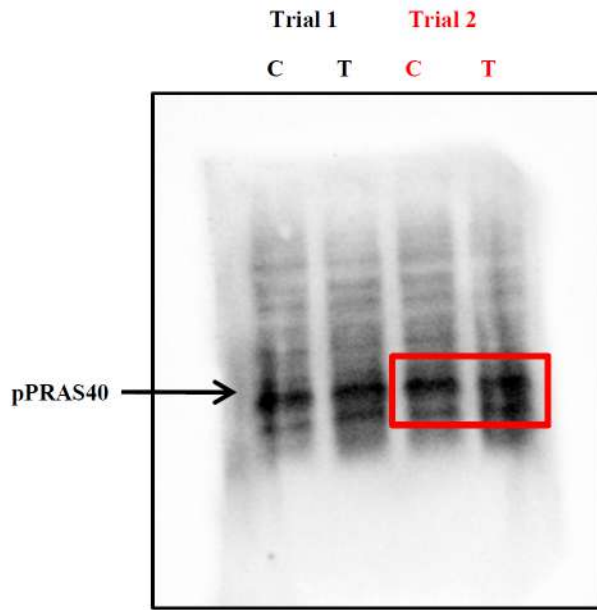

ii

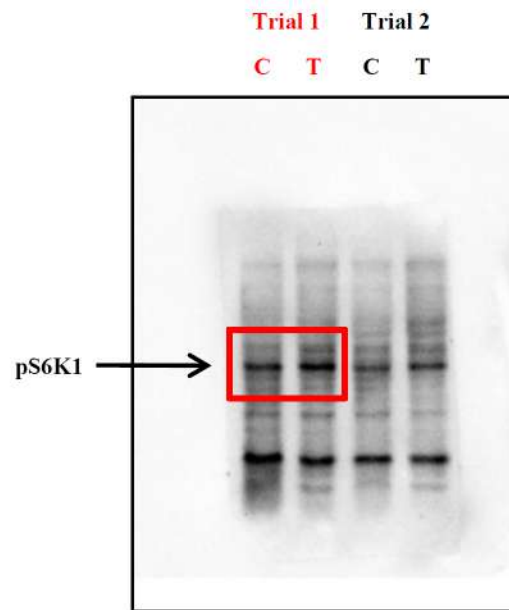

iii

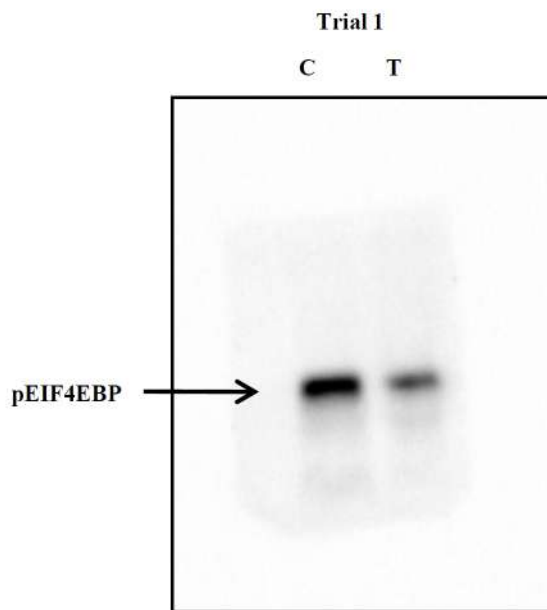

iv

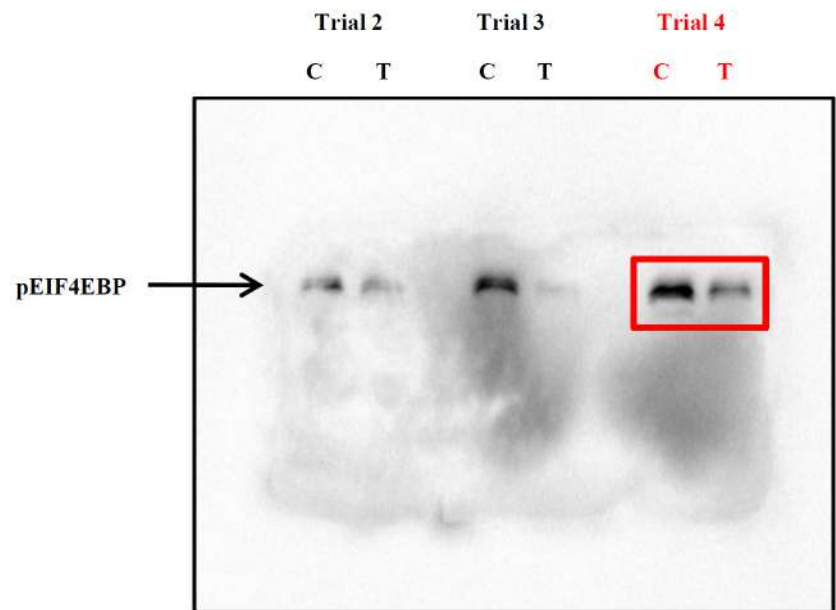



# Supplementary figure 14

**i**

**Trial 1**    Trial 2    Trial 3  
**C** **T**    C T    C T

RICTOR

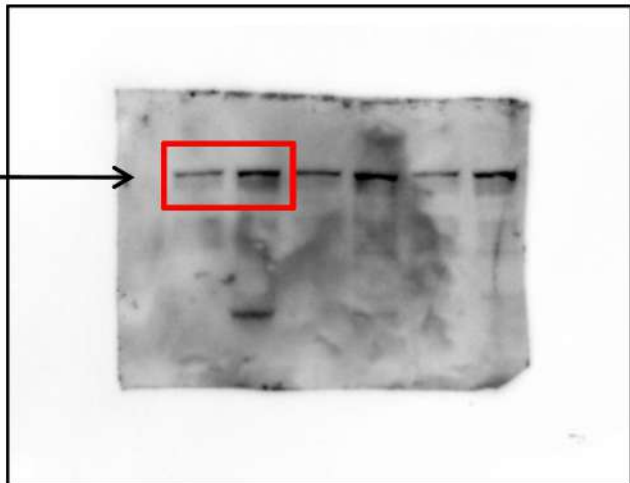

**ii**

Trial 1    Trial 2    **Trial 3**  
C T    C T    **C T**

mSIN1

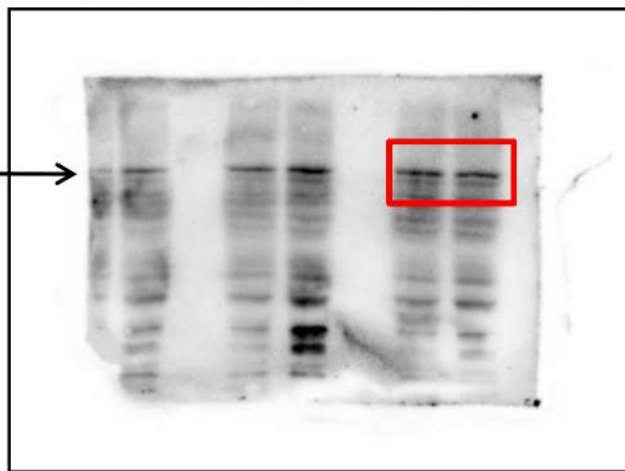

**iii**

**Trial 1**    Trial 2    Trial 3  
**C** **T**    C T    C T

AKT

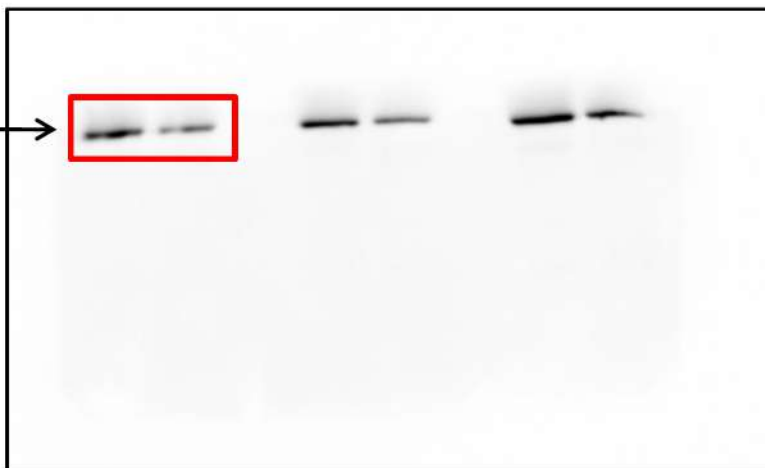

# Supplementary figure 15

**i**

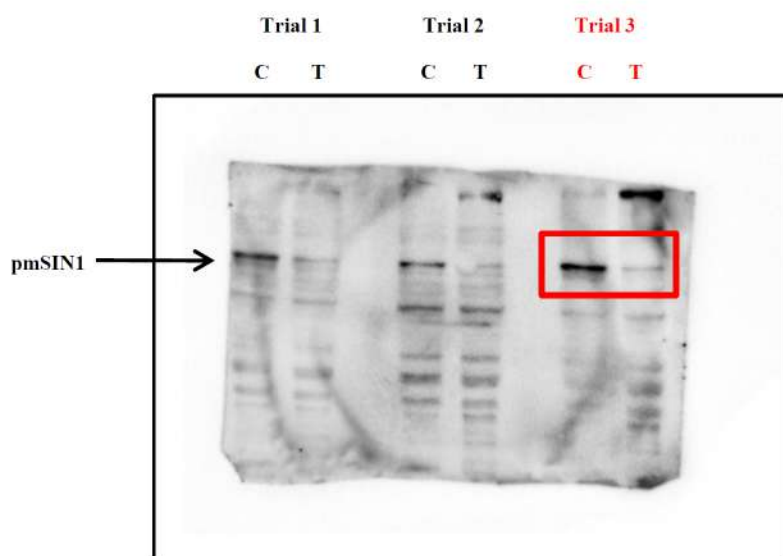

**ii**

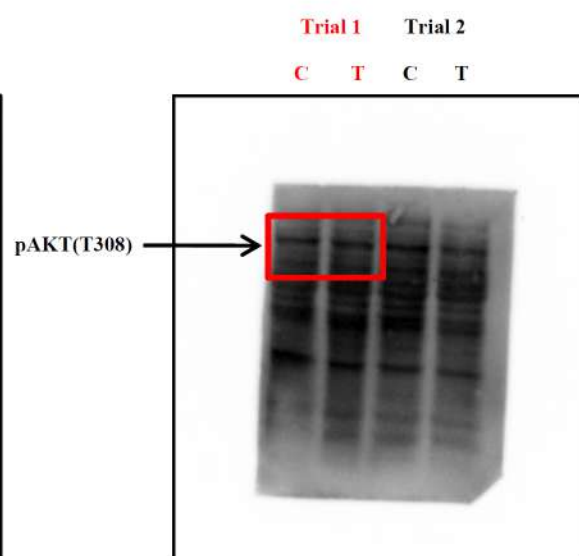

**iii**

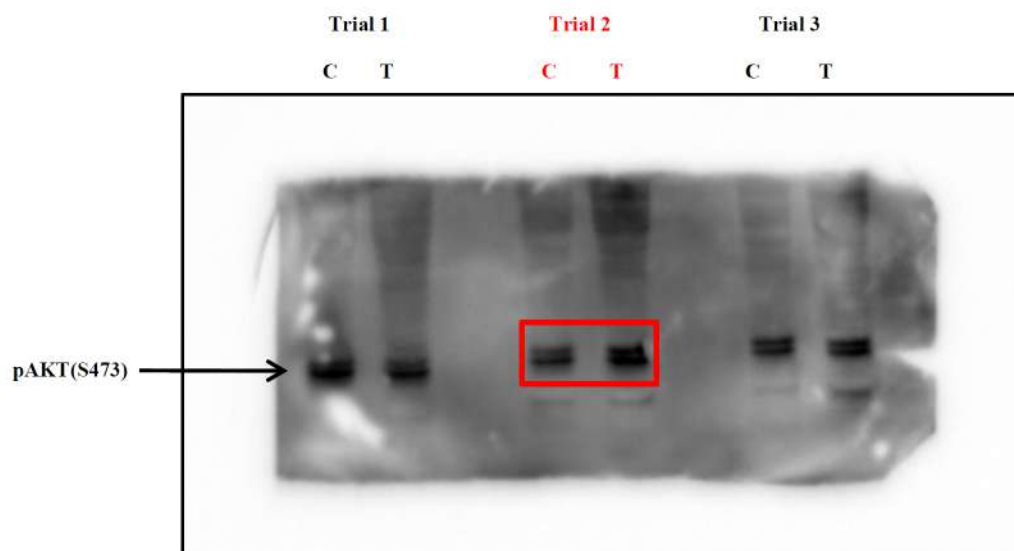

# Supplementary figure 16

i

Trial 1 Trial 2 Trial 3  
C T C T C T

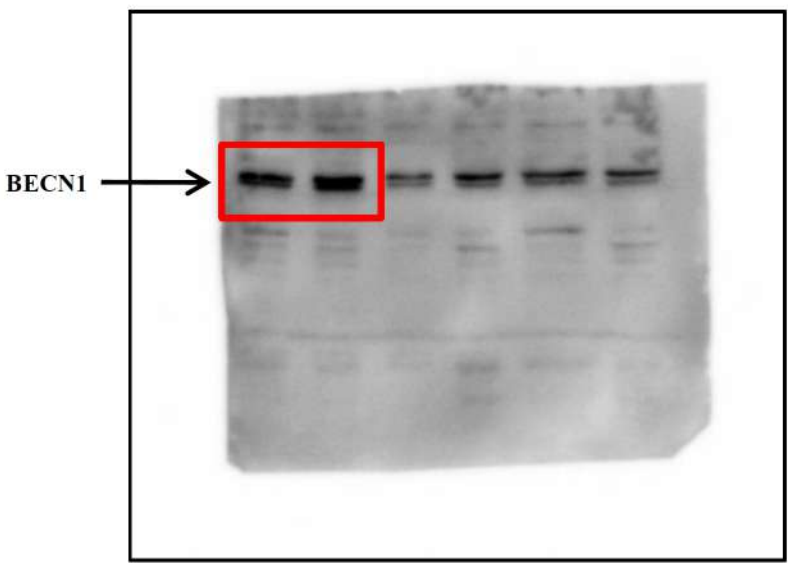

ii

Trial 1  
0 0.5 2 4

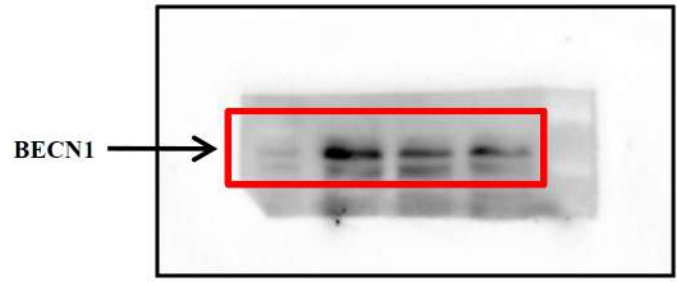

iii

Trial 2  
0 0.5 2 4

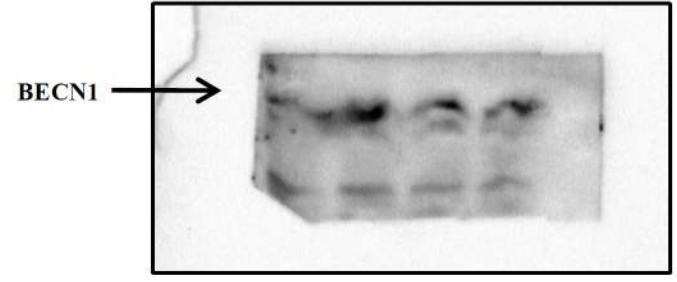

iv

0 6 24 48

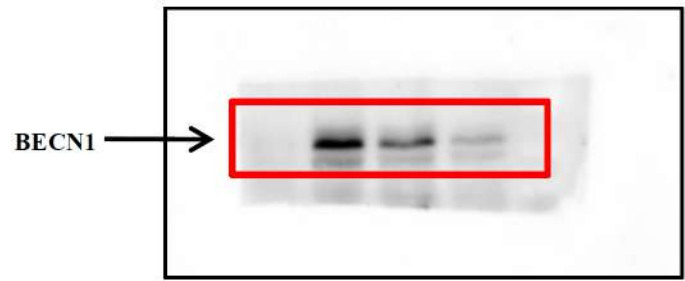

v

Trial 1 Trial 2 Trial 3  
C T C T C T

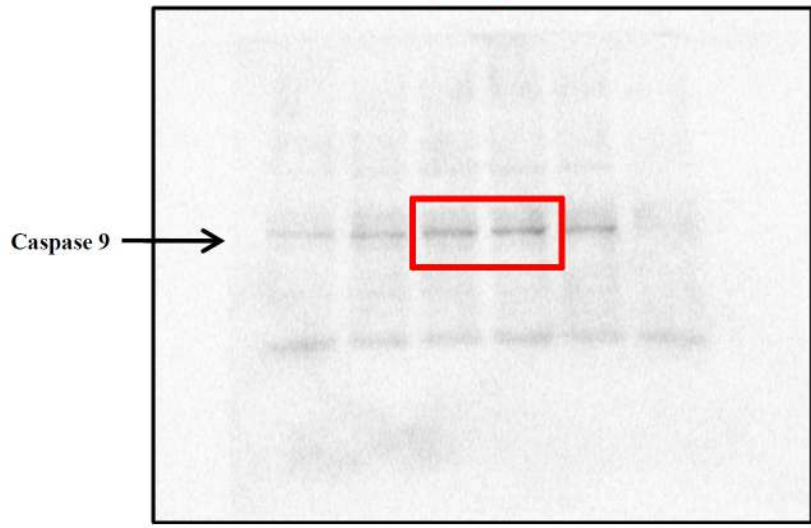

# Supplementary figure 17

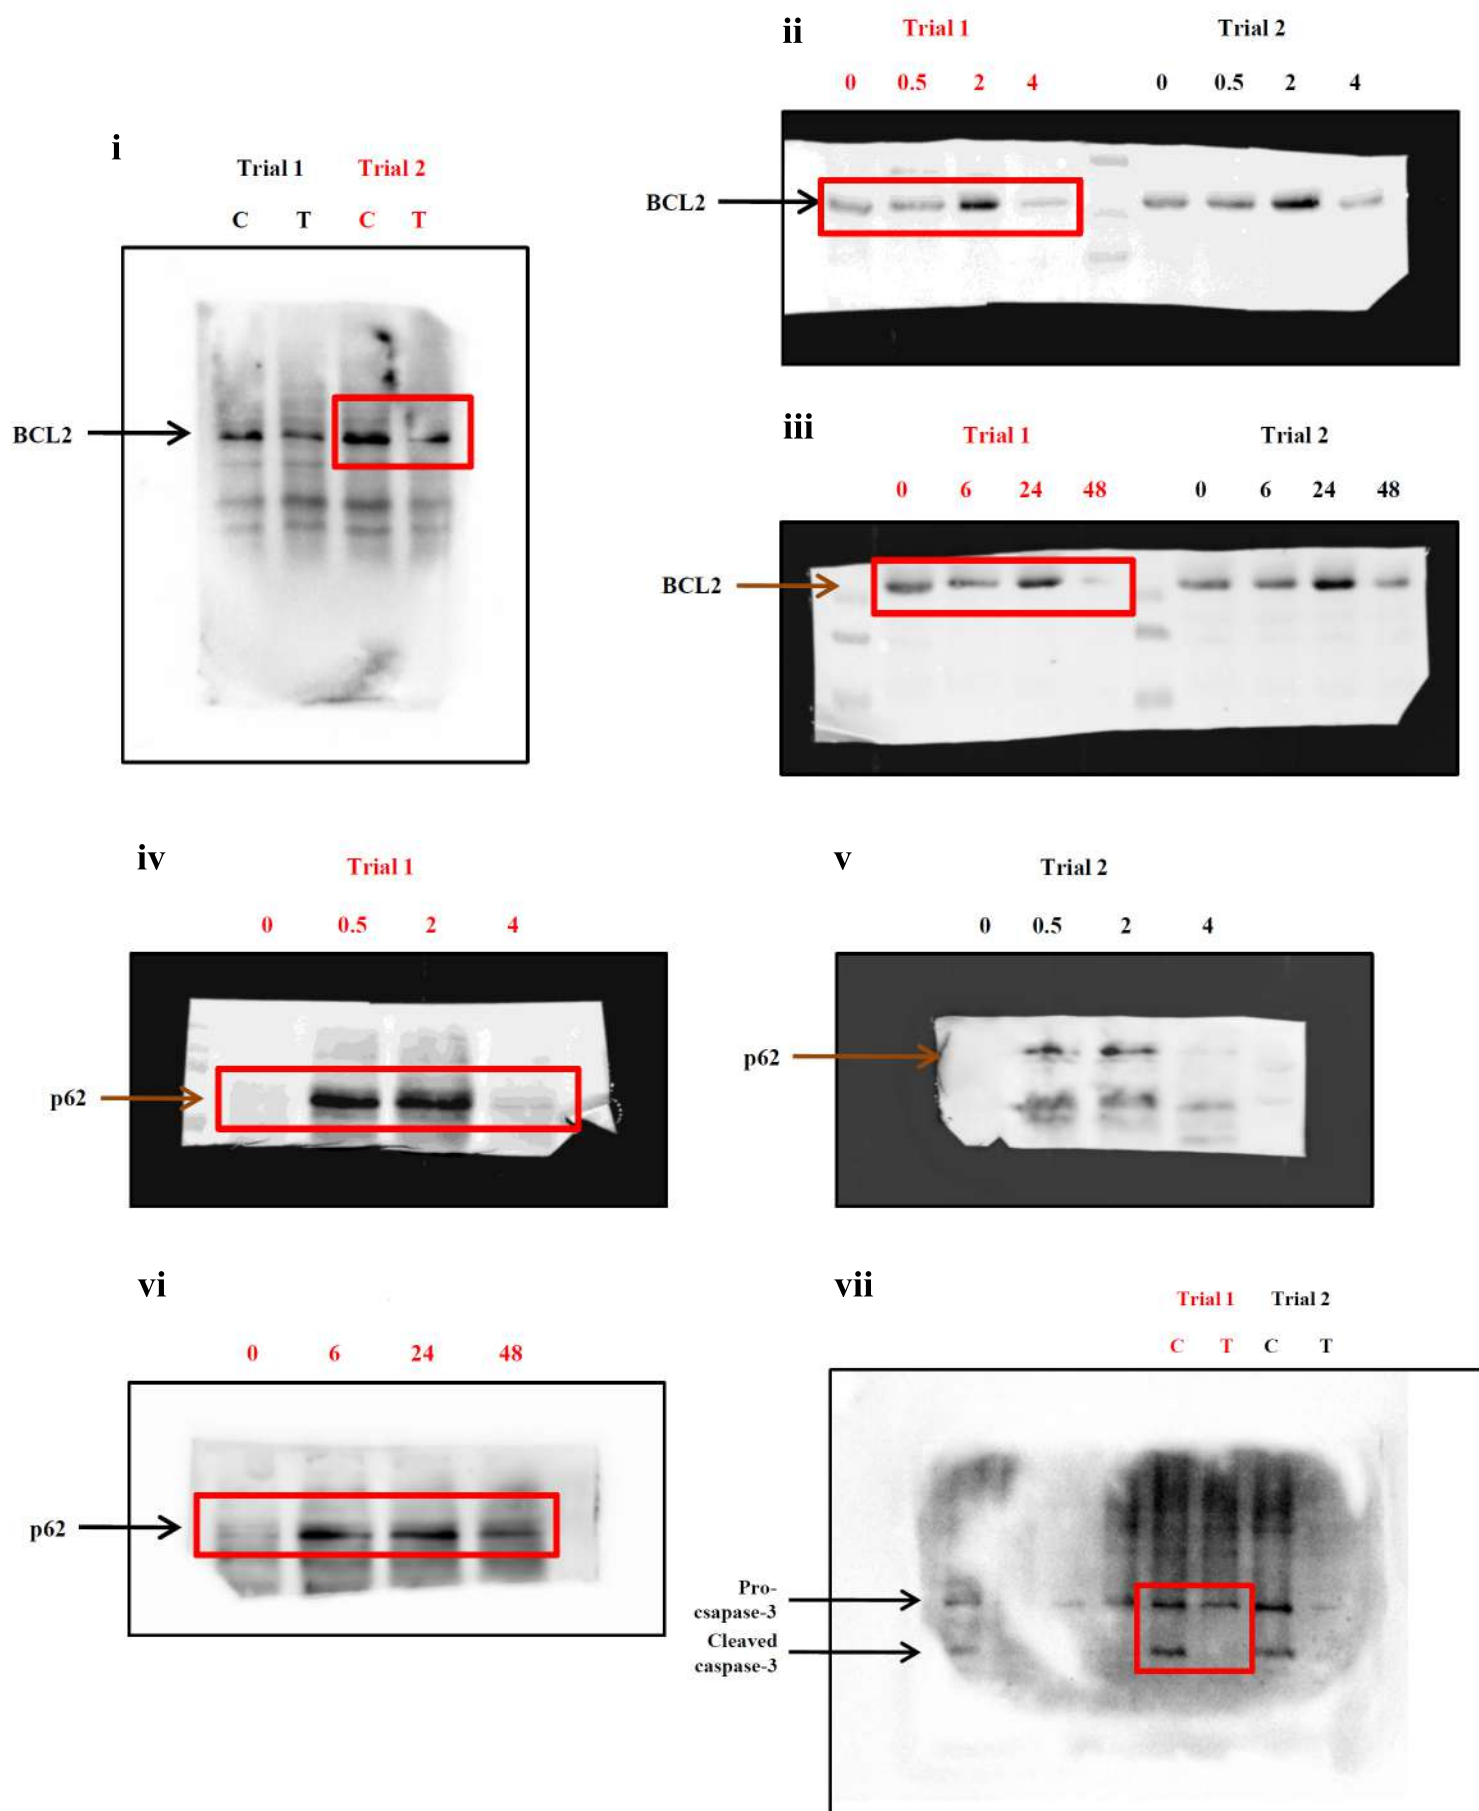

# Supplementary figure 18

ii

i

Trial 1 Trial 2 Trial 3  
C T C T C T

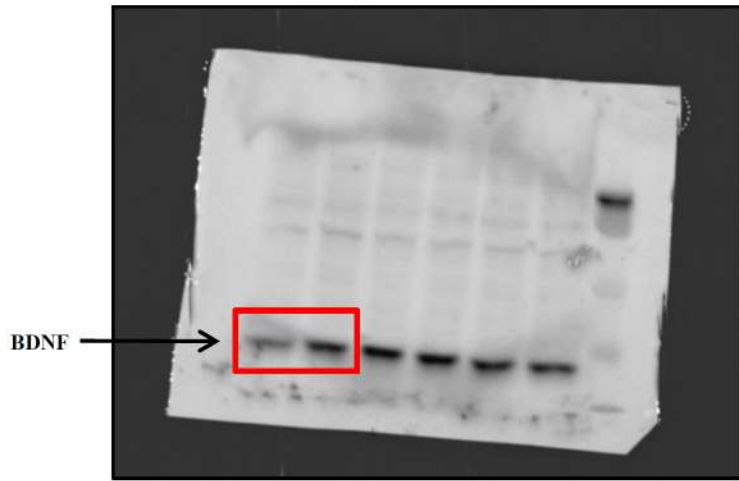

Trial Trial  
BDNF+ 3-NPA C C 3-NPA BDNF+  
3-NPA 3-NPA

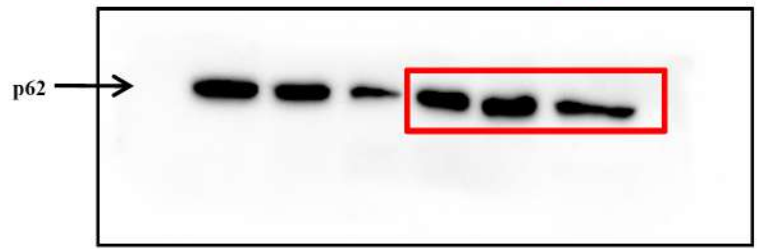

iii

Trial 1 Trial 2  
C 3-NPA BDNF+ C 3-NPA BDNF+  
3-NPA 3-NPA

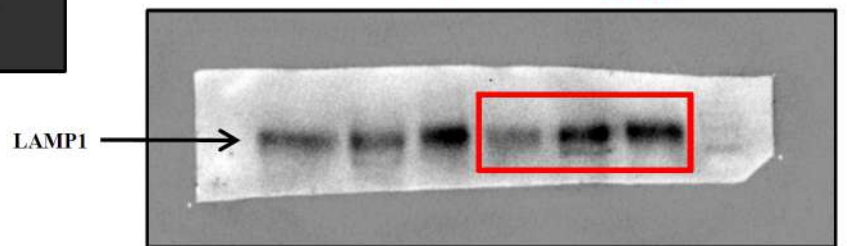

iv

Trial 1 Trial 2  
C BDNF BDNF+ C BDNF BDNF+  
3-NPA 3-NPA 3-NPA

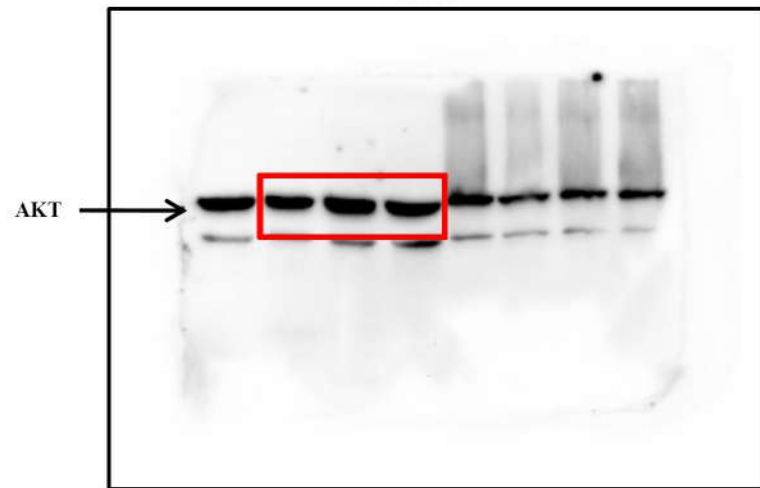

v

Trial 1 Trial 2  
C BDNF BDNF+ C BDNF BDNF+  
3-NPA 3-NPA 3-NPA

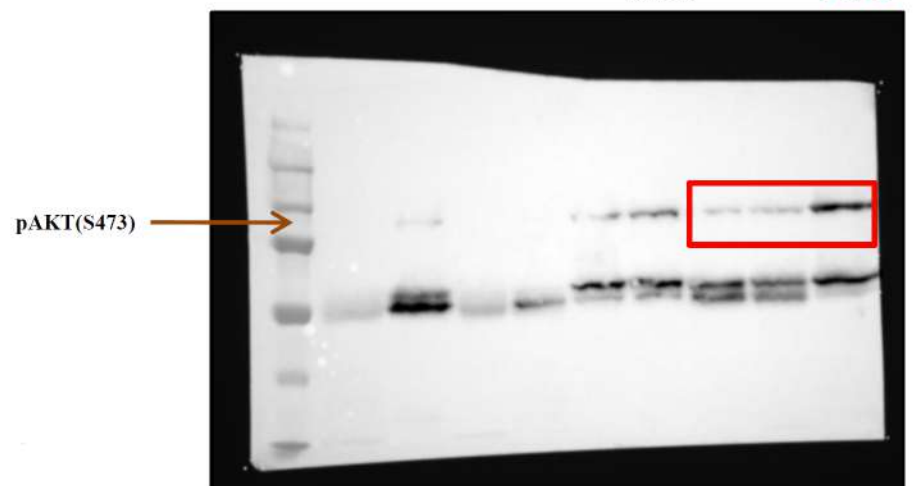

Supplementary figure 19

**i**

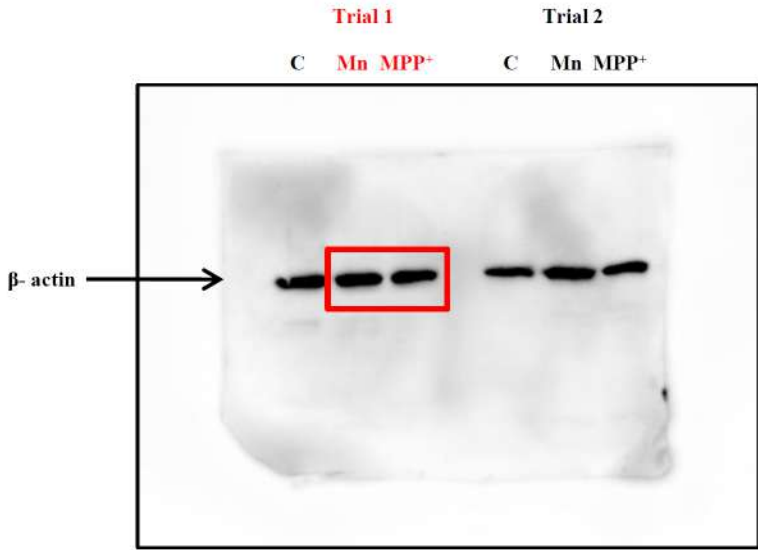

**ii**

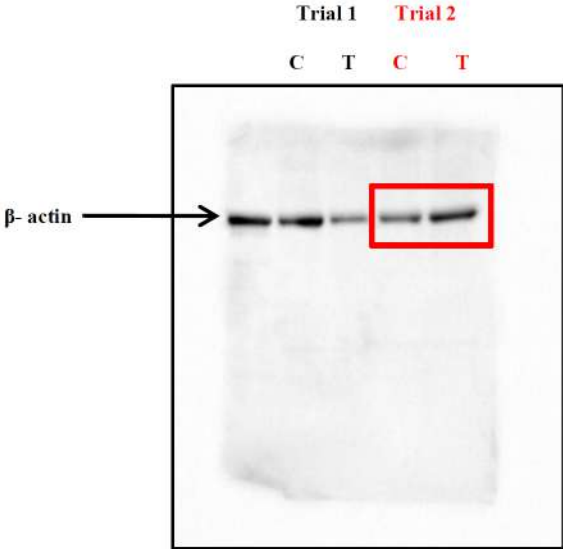

**iii**

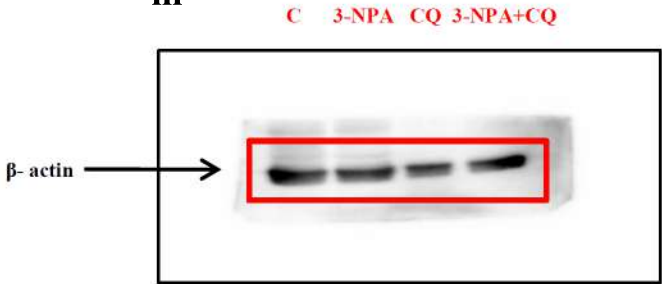

**iv**

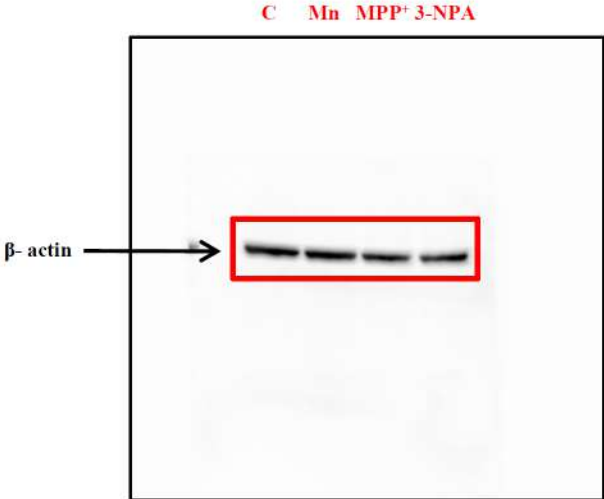

**v**

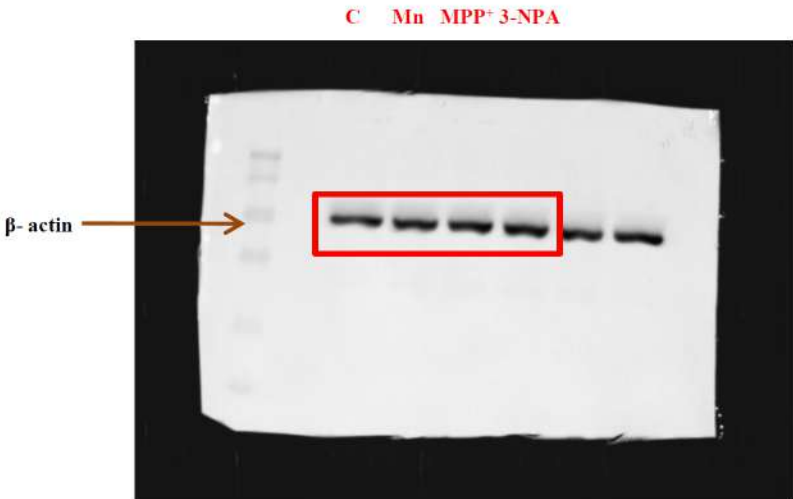

vi

Trial 1      Trial 2      Trial 3  
C T      C T      C T

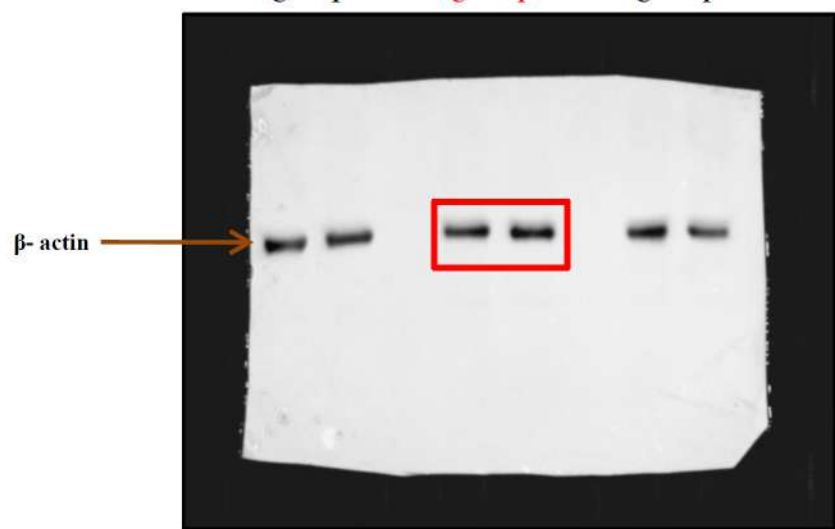

vii

Trial 1      Trial 2  
C T      C T

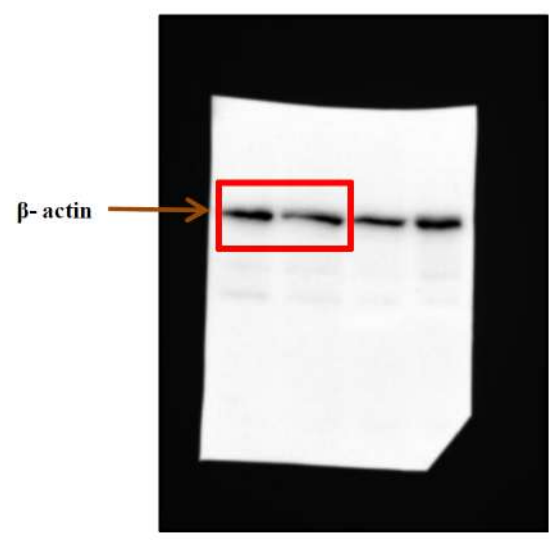

viii

Trial 1      Trial 2      Trial 3  
C T      C T      C T

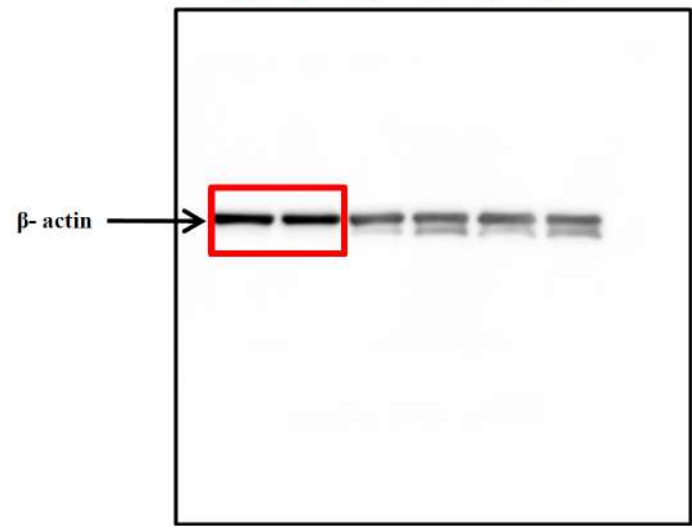

ix

C T

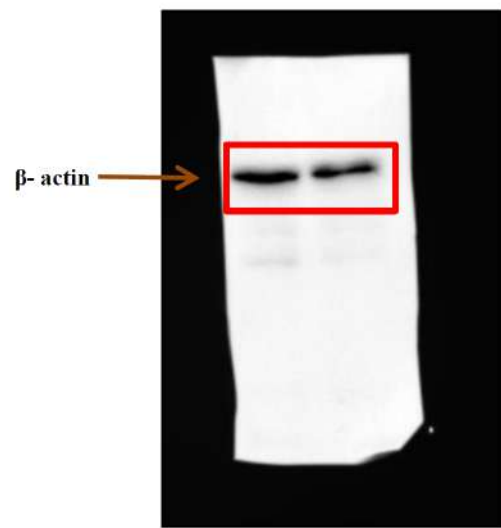

X

Trial 1      Trial 2  
0 0.5 2 4      0 0.5 2 4

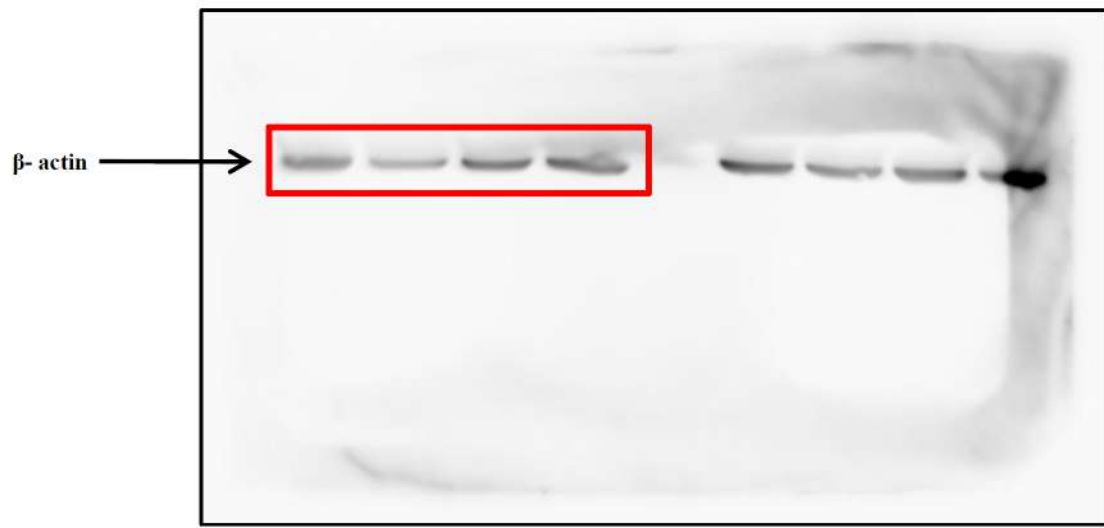

**xi**

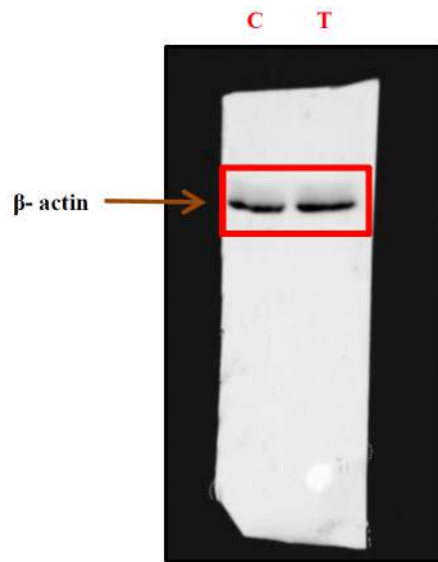

**xii**

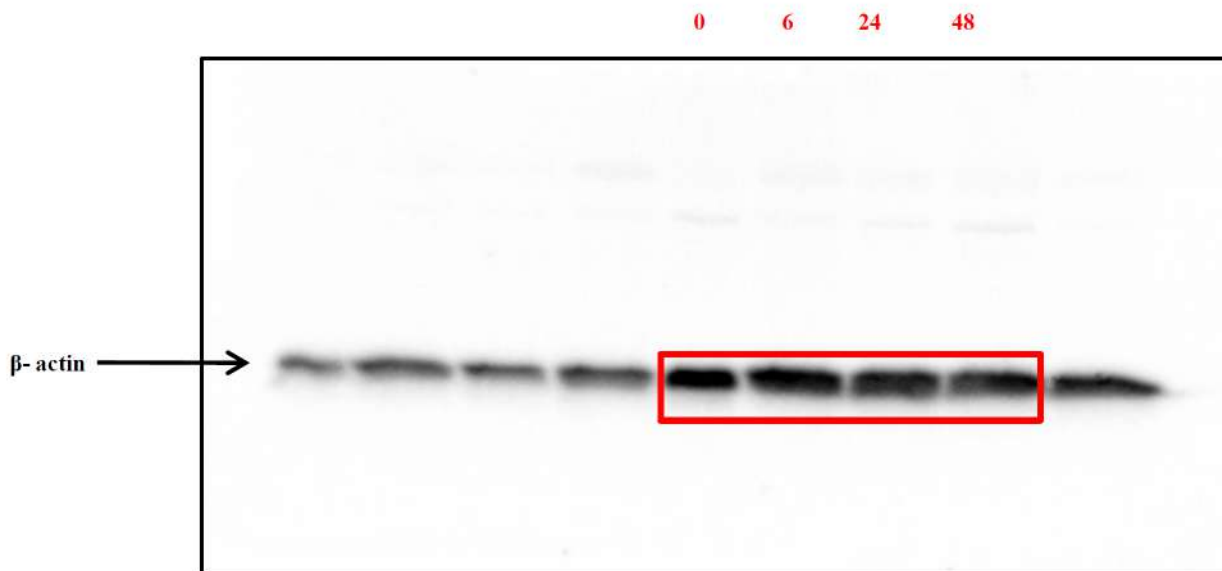

**xiii**

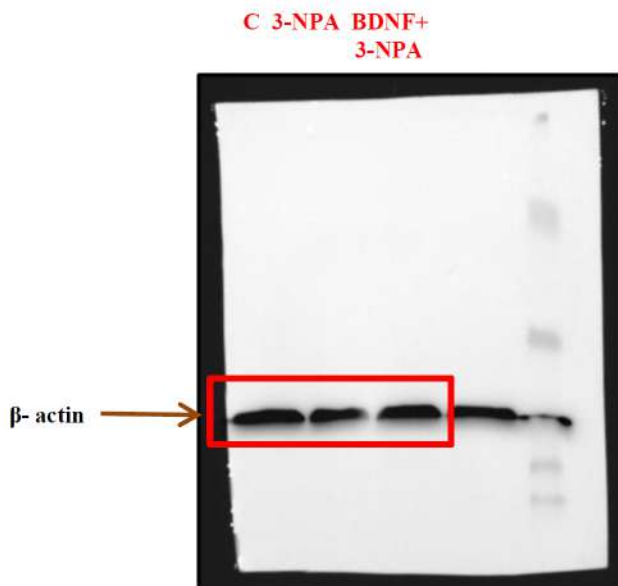

**xiv**

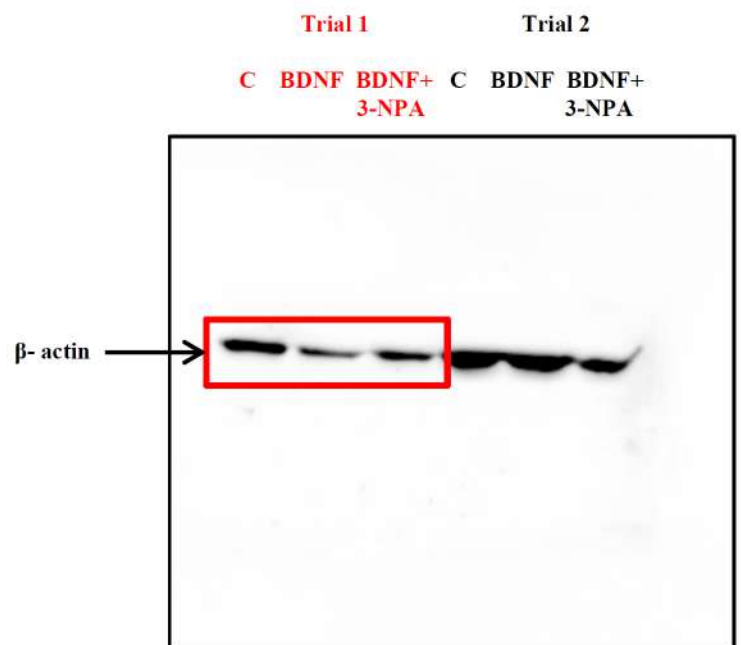

Supplement: 41598_2020_79339_MOESM1_ESM.pdf [file 41598_2020_79339_MOESM1_ESM.pdf]
